# Supplementary material for: Weight loss, insulin resistance, and study design confound results in a meta-analysis of animal models of fatty liver
Source: eLife. 2020 Oct 16;9:e56573. doi: 10.7554/eLife.56573 (PMC7647398; doi:10.7554/eLife.56573)
Supplement: Figure 1—source data 1. — Details and raw data of all studies included in the meta-analysis. This data can be used with the R code found in Supplementary Methods to run all analyses. [file elife-56573-fig1-data1.xlsx]

## Sheet: Sheet1
ID	Study	Title of Paper	Models	Model_simple	Background	Background_simple	Protocol	Randomisation	Blinding	Power_calculation	Qual_score	Chol_per	FructGluc_per	Sucr_kcal	Fat_kcal	Sex	Paper	Intervention	Drug_dose	Unit	Drug dose (long)	Indiv_drug_class_3	Drug_Class_new_1_all	Age_start	Duration	Age_end	Wt_Int	Wt_Pla	Wt_change	Gluc_Int	Gluc_Pla	Gluc_change	Insul_Int	Insul_Pla	Insul_change	TG_Int_Mean_abs	TG_Int_SD_abs	TG_Int_size	TG_Pla_Mean_abs	TG_Pla_SD_abs	TG_Pla_size	Stea_Int_Mean	Stea_Int_SD	Stea_Int_size	Stea_Pla_Mean	Stea_Pla_SD	Stea_Pla_size	LobIn_Int_Mean	LobIn_Int_SD
1087	Provenzano 2014	n-3 polyunsaturated fatty acids worsen inflammation and fibrosis in experimental nonalcoholic steatohepatitis	Methionine and choline deficient diet / MCD	Methionine and choline deficient diet / MCD	BALB/c	BALB/c	1	1	1	0	3					M	Provenzano 2014_2	n-3 PUFA			25mg	PUFA (Fish oil)	Omega-3 polyunsaturated fatty acids (mix)	2	8	4	13.29	16.4	0.810366													1.5	0.76	8	1.25	0.46	8
1909	Park 2016	Statins Increase Mitochondrial and Peroxisomal Fatty Acid Oxidation in the Liver and Prevent Non-Alcoholic Steatohepatitis in Mice	Methionine and choline deficient diet / MCD	Methionine and choline deficient diet / MCD	C57BL/6N	C57BL/6N	1	0	1	0	2					M	Park 2016_1	Atorvastatin	15	mg/kg	15 mg/kg/day	Statin (Atorvastatin)	Statin	2	6	3.5	14.34	15.61	0.918642							0.00968486	0.00223709	8	0.0182936	0.00723119	2	0.736842	0.565685	8	2.10526	0.75	2	0.444444	0.565685
869	Kita 2012	Metformin Prevents and Reverses Inflammation in a Non-Diabetic Mouse Model of Nonalcoholic Steatohepatitis	MCD + HFD (MCDHF)	MCD + HFD (MCDHF)	C57BL/6?	C57BL/6?	1	0	1	0	2				60	M	Kita 2012	Metformin	37.5	mg/kg	37.5 mg/kg	Metformin	Biguanide	2	8	4	14.6	15.2	0.960526	2.84	3.54	0.80226	74.25	82.5	0.9	0.011299	0.0282475	25	0.0265526	0.0202139	20							2.5	2.5
223	Valdecantos 2017	A Novel Glucagon-Like Peptide 1/Glucagon Receptor Dual Agonist Improves Steatohepatitis and Liver Regeneration in Mice	Methionine and choline deficient diet / MCD	Methionine and choline deficient diet / MCD	C57BL/6?	C57BL/6?	0	0	0	0	0					M	Valdecantos 2017_2	G49	2.2	mg/kg	4.4mg/kg every 2 days	G49	GLP-1 agonist	2.1	3	2.85	14.7	16.25	0.904615	4.44	5.22	0.850575	114	30	3.8	0.101691	0.0186433	11	0.305073	0.149147	11	0.6	0.33	11	2.8	0.33	11	0.2	0.33
2617	Ji 2015	Resveratrol ameliorates hepatic steatosis and inflammation in methionine/cholinedeficient diet-induced steatohepatitis through regulating autophagy	Methionine and choline deficient diet / MCD	Methionine and choline deficient diet / MCD	C57BL/6?	C57BL/6?	1	1	0	0	2					M	Ji 2015_1	Resveratrol	175	mg/kg	100, 250 mg/kg	Polyphenol (Resveratrol)	Polyphenol (Resveratrol)	1.75	4	2.75	14.7	13.7	1.07299							0.00610146	0.00079093	20	0.011638	0.00180784	10
1909	Park 2016	Statins Increase Mitochondrial and Peroxisomal Fatty Acid Oxidation in the Liver and Prevent Non-Alcoholic Steatohepatitis in Mice	Methionine and choline deficient diet / MCD	Methionine and choline deficient diet / MCD	C57BL/6N	C57BL/6N	1	0	1	0	2					M	Park 2016_4	Fluvastatin	15	mg/kg	15 mg/kg/day	Statin (Fluvastatin)	Statin	2	6	3.5	14.82	15.61	0.949391							0.00766718	0.00255667	8	0.0182936	0.00723119	2	0.451128	0.424264	8	2.10526	0.75	2	0.506173	0.424264
1087	Provenzano 2014	n-3 polyunsaturated fatty acids worsen inflammation and fibrosis in experimental nonalcoholic steatohepatitis	Methionine and choline deficient diet / MCD	Methionine and choline deficient diet / MCD	BALB/c	BALB/c	1	1	1	0	3					M	Provenzano 2014_1	n-3 PUFA			25mg	PUFA (Fish oil)	Omega-3 polyunsaturated fatty acids (mix)	2	4	3	14.85	14.82	1.00202													1.11	0.6	9	1.38	0.52	8
1909	Park 2016	Statins Increase Mitochondrial and Peroxisomal Fatty Acid Oxidation in the Liver and Prevent Non-Alcoholic Steatohepatitis in Mice	Methionine and choline deficient diet / MCD	Methionine and choline deficient diet / MCD	C57BL/6N	C57BL/6N	1	0	1	0	2					M	Park 2016_2	Pitavastatin	15	mg/kg	15 mg/kg/day	Statin (Pitavastatin)	Statin	2	6	3.5	14.89	15.61	0.953876							0.00928132	0.00223709	8	0.0182936	0.00723119	2	0.556391	0.424264	8	2.10526	0.75	2	0.407407	0.424264
5414	Middleton 2018	BET Inhibition Improves NASH and Liver Fibrosis	HFD + STZ	HFD + STZ	C57BL/6?	C57BL/6?	1	1	1	1	4				60	M	Middleton 2018_2	Telmisartan	10	mg/kg	10mg/kg	ARB (Telmisartan)	Angiotensin Receptor Blocker	2.25	3	3	14.9	17	0.876471	20.2	22.3	0.90583	75	60	1.25
1909	Park 2016	Statins Increase Mitochondrial and Peroxisomal Fatty Acid Oxidation in the Liver and Prevent Non-Alcoholic Steatohepatitis in Mice	Methionine and choline deficient diet / MCD	Methionine and choline deficient diet / MCD	C57BL/6N	C57BL/6N	1	0	1	0	2					M	Park 2016_3	Rosuvastatin	15	mg/kg	15 mg/kg/day	Statin (Rosuvastatin)	Statin	2	6	3.5	14.96	15.61	0.95836							0.00928132	0.00255667	8	0.0182936	0.00723119	2	1.08271	0.282843	8	2.10526	0.75	2	0.654321	0.565685
5438	Nakashima 2018	Anti-fibrotic activity of Euglena gracilis and paramylon in a mouse model of non-alcoholic steatohepatitis	HFD + STZ	HFD + STZ	C57BL/6J	C57BL/6J	0	1	0	0	1				57	M	Nakashima 2018	Telmisartan	10	mg/kg	10 mg/kg	ARB (Telmisartan)	Angiotensin Receptor Blocker	1.25	3.85714	2.21429	15	17	0.882353	59.496	37.074	1.60479				0.0310723	0.00820248	6	0.0478324	0.0136651	6	0.66	0.52	6	1	0.1	6	1	0.89
1909	Park 2016	Statins Increase Mitochondrial and Peroxisomal Fatty Acid Oxidation in the Liver and Prevent Non-Alcoholic Steatohepatitis in Mice	Methionine and choline deficient diet / MCD	Methionine and choline deficient diet / MCD	C57BL/6N	C57BL/6N	1	0	1	0	2					M	Park 2016_5	Simvastatin	15	mg/kg	15 mg/kg/day	Statin (Simvastatin)	Statin	2	6	3.5	15.13	15.61	0.96925							0.011568	0.00415459	8	0.0182936	0.00723119	2	0.992481	0.424264	8	2.10526	0.75	2	0.728395	0.282843
1561	Gil‑Ramirez 2016	Modulation of cholesterol‑related gene expression by ergosterol and ergosterol‑enriched extracts obtained from Agaricus bisporus	High Cholesterol Diet	High Cholesterol Diet	C57BL/6JRj	C57BL/6?	1	1	0	0	2	2				M	Gil‑Ramirez 2016_1	Simvastatin			0.025% diet	Statin (Simvastatin)	Statin	2.5	4	3.5	15.48	18.97	0.816025							0.000881322	0.000203382	8	0.00420323	0.000689239	3
5249	Ou 2018	Silybin Alleviates Hepatic Steatosis and Fibrosis in NASH Mice by Inhibiting Oxidative Stress and Involvement with the Nf-Œ∫B Pathway	Methionine and choline deficient diet / MCD	Methionine and choline deficient diet / MCD	C57BL/6?	C57BL/6?	1	1	0	0	2					M	Ou 2018	Silymarin	105	mg/kg	105 mg/kg	Silymarin	Silymarin	1.5	8	3.5	16	13.5	1.18519							0.39	0.05	6	0.69	0.08	6
5013	Oniciu 2018	Gemcabene downregulates inflammatory, lipid-altering and cell-signaling genes in the STAM‚Ñ¢ model of NASH	HFD + STZ	HFD + STZ	C57BL/6?	C57BL/6?	1	0	1	0	2				57	M	Oniciu 2018	Telmisartan	10	mg/kg	10 mg/kg/day	ARB (Telmisartan)	Angiotensin Receptor Blocker	1.5	3	2.25	16.6	19.5	0.851282	47.508	32.412	1.46575										0.857143	0.377964	7	1	0.1	8	0.857143	0.690066
5414	Middleton 2018	BET Inhibition Improves NASH and Liver Fibrosis	HFD + STZ	HFD + STZ	C57BL/6?	C57BL/6?	1	1	1	1	4				60	M	Middleton 2018_1	Telmisartan	10	mg/kg	10mg/kg	ARB (Telmisartan)	Angiotensin Receptor Blocker	1.5	3	2.25	17	18	0.944444	32	28.63	1.11771										1	0.55	14	1.58	0.62	31	1.57	0.76
141	Klein 2013	Linagliptin Alleviates Hepatic Steatosis and Inflammation in a Mouse Model of Non-Alcoholic Steatohepatitis.	HFD + STZ	HFD + STZ	C57BL/6?	C57BL/6?	1	0	1	0	2			7	57	M	Klein 2013_3	Linagliptin	20	mg/kg	10, 30 mg/kg	DPP4 inhibitor (Linagliptin)	DPP4 inhibitor	1.2	4	2.2	17.15	17.3	0.991329	31.67	27.05	1.17079
141	Klein 2013	Linagliptin Alleviates Hepatic Steatosis and Inflammation in a Mouse Model of Non-Alcoholic Steatohepatitis.	HFD + STZ	HFD + STZ	C57BL/6?	C57BL/6?	1	0	1	0	2			7	57	M	Klein 2013_1	Linagliptin	5.5	mg/kg	1, 10 mg/kg	DPP4 inhibitor (Linagliptin)	DPP4 inhibitor	1.4	2	1.9	17.8	17.2	1.03488	27.195	29.18	0.931974
4987	Al-Fayoumi 2018	Pilot study of the antifibrotic effects of the multikinase inhibitor pacritinib in a mouse model of liver fibrosis	HFD + STZ	HFD + STZ	C57BL/6J	C57BL/6J	1	0	0	0	1				60	M	Al-Fayoumi 2018	Telmisartan	10	mg/kg	10mg/kg	ARB (Telmisartan)	Angiotensin Receptor Blocker	1.5	3	2	18	19.7	0.913706													0.5	0.534522	7	1.25	0.46291	8	0.875	0.57735
616	Lee 2014	Exendin-4 Regulates Lipid Metabolism and Fibroblast Growth Factor 21 in Hepatic Steatosis.	High Fat Diet / HFD	High Fat Diet / HFD	C57BL/6J	C57BL/6J	1	1	0	0	2				45	M	Lee 2014	Exendin-4	0.0042	mg/kg	1 nmol/kg/day	GLP-1 agonist (Exenatide)	GLP-1 agonist	1.5	10	4	18	21.1	0.853081							0.26138	0.0248956	8	0.364641	0.0311275	8
5244	Bae 2018	Gypenoside UL4-Rich Gynostemma pentaphyllum Extract Exerts a Hepatoprotective Effect on Diet-Induced Nonalcoholic Fatty Liver Disease	Methionine and choline deficient diet / MCD	Methionine and choline deficient diet / MCD	C57BLS/J	C57BL/6?	1	1	0	0	2					M	Bae 2018	Silymarin	100	mg/kg	100 mg/kg	Silymarin	Silymarin	2.25	8	4.25	18.5	17.2	1.07558							0.672291	0.142367	10	0.881322	0.178524	10
223	Valdecantos 2017	A Novel Glucagon-Like Peptide 1/Glucagon Receptor Dual Agonist Improves Steatohepatitis and Liver Regeneration in Mice	Methionine and choline deficient diet / MCD	Methionine and choline deficient diet / MCD	C57BL/6?	C57BL/6?	0	0	0	0	0					M	Valdecantos 2017_1	G49	2.2	mg/kg	4.4mg/kg every 2 days	G49	GLP-1 agonist	2.1	2	2.6	18.8	20	0.94							0.101691	0.0562118	11	0.192083	0.112424	11	0.1	0.1	11	2.6	0.66	11	0.3	0.66
767	Ishikawa 2014	L-Carnitine Prevents Progression of Non-Alcoholic Steatohepatitis in a Mouse Model with Upregulation of Mitochondrial Pathway	HFD + STZ	HFD + STZ	C57BL/6J	C57BL/6J	1	1	1	0	3				60	M	Ishikawa 2014_1	L-carnitine			0.0028	L-carnitine	Carnitine	2	4	3	19	20	0.95	32.75	23.59	1.3883				0.0146887	0.0146887	6	0.0248578	0.0203382	3	1.1	0.8	6	2	0.6	3	0.8	0.4
2580	Pais 2014	In Vivo Efficacy Study of Milk Thistle Extract (ETHIS-094 TM ) in STAM TM Model of Nonalcoholic Steatohepatitis	HFD + STZ	HFD + STZ	C57BL/6?	C57BL/6?	1	0	0	0	1				57	M	Pais 2014_1	Silymarin	750	mg/kg	500, 1000 mg/kg	Silymarin	Silymarin	1	4	2	19.5	19.5	1													0.8	0.447	10	1.4	0.5477	5	2	0.1
767	Ishikawa 2014	L-Carnitine Prevents Progression of Non-Alcoholic Steatohepatitis in a Mouse Model with Upregulation of Mitochondrial Pathway	HFD + STZ	HFD + STZ	C57BL/6J	C57BL/6J	1	1	1	0	3				60	M	Ishikawa 2014_2	Vitamin E (α-tocopherol)	0.01	%	0.0001	Vitamin E	Vitamin E	2	4	3	19.5	20	0.975	31.91	23.59	1.35269				0.0124289	0.0135588	6	0.0248578	0.0203382	3	1.6	0.4	6	2	0.6	3	0.9	0.3
1561	Gil‑Ramirez 2015	Modulation of cholesterol‑related gene expression by ergosterol and ergosterol‑enriched extracts obtained from Agaricus bisporus	High Cholesterol Diet	High Cholesterol Diet	C57BL/6JRj	C57BL/6?	1	1	0	0	2	2				M	Gil‑Ramirez 2015_2	Ezetimibe	0.005	%	0.005% wt/wt	Ezetimibe	Cholesterol Absorption Inhibitor	2.5	4	3.5	19.52	18.97	1.02899							0.000994312	0.000587548	8	0.00420323	0.000689239	3
4966	Kruger 2018	Prolonged cenicriviroc therapy reduces hepatic fibrosis despite steatohepatitis in a diet-induced mouse model of nonalcoholic steatohepatitis	CDAA + HFD (CDAHFD)	CDAA + HFD (CDAHFD)	C57BL/6N	C57BL/6N	0	0	1	0	1				60	M	Kruger 2018_2	Cenicriviroc	25	mg/kg	20, 30 mg/kg	Cenicriviroc	CCR2/CCR5 antagonist	1.5	14	5	20	22	0.909091	9.68475	9.29625	1.04179										2.9	0.15	16	3	0.1	8	3	0.1
4966	Kruger 2018	Prolonged cenicriviroc therapy reduces hepatic fibrosis despite steatohepatitis in a diet-induced mouse model of nonalcoholic steatohepatitis	CDAA + HFD (CDAHFD)	CDAA + HFD (CDAHFD)	C57BL/6N	C57BL/6N	0	0	1	0	1				60	M	Kruger 2018_1	Cenicriviroc	20	mg/kg	10, 30 mg/kg	Cenicriviroc	CCR2/CCR5 antagonist	1.5	4	2.5	20	21	0.952381	11.2387	10.2952	1.09164										2.7	0.3	22	2.6	0.4	12	2.8	0.2
1816	Hirako 2010	Effect of concomitantly used fish oil and cholesterol on lipid metabolism	Fish oil and cholesterol diet	Fish oil and cholesterol diet	C57BL/6J	C57BL/6J	1	0	0	0	1	2			47	F	Hirako 2010_1	n-3 PUFA (Fish Oil)	16.5	%	80, 250 g/kg	PUFA (Fish oil)	Omega-3 polyunsaturated fatty acids (mix)	2	8	4	20.645	21.49	0.960679	8.85	10	0.885				0.00165	0.0003	10	0.0095	0.0013	5
1039	Orime 2016	Lipid-lowering agents inhibit hepatic steatosis in a non-alcoholic steatohepatitis-derived hepatocellular carcinoma mouse model	HFD + STZ	HFD + STZ	Not stated	Not stated	1	0	0	0	1					M	Orime 2016_3	Ezetimibe	0.005	%	0.005% wt/wt	Ezetimibe	Cholesterol Absorption Inhibitor	1.75	4	2.75	21	22	0.954545	21.09	24.6975	0.853933	82.5	117	0.705128	0.0485857	0.0415125	6	0.090392	0.0249143	2	2	0.1	6	3	0.49	2
1039	Orime 2016	Lipid-lowering agents inhibit hepatic steatosis in a non-alcoholic steatohepatitis-derived hepatocellular carcinoma mouse model	HFD + STZ	HFD + STZ	Not stated	Not stated	1	0	0	0	1					M	Orime 2016_2	Fenofibrate	0.1	%	0.1% wt/wt	Fibrate (Fenofibrate)	Fibrates	1.75	4	2.75	21.3	22	0.968182	21.0345	24.6975	0.851685	103.5	117	0.884615	0.0497156	0.022146	6	0.090392	0.0249143	2	2	0.1	6	3	0.49	2
3712	Le 2012	DOCOSAHEXAENOIC ACID AND ARACHIDONIC ACID PREVENT ESSENTIAL FATTY ACID DEFICIENCY AND HEPATIC STEATOSIS	High Fat Diet / HFD	High Fat Diet / HFD	C57BL/6?	C57BL/6?	1	0	1	0	2				60		Le 2012_1	Docosahexaenoic acid + Arachadonic acid (20:1)	2.17	%	0.21, 2.1, 4.2%	Docosahexaenoic acid + Arachadonic acid (20:1)	Omega-3 polyunsaturated fatty acids (mix)	1.1	9	3.35	21.5	22.5	0.955556													0.666667	0.513333	15	2.6	0.55	5
4507	Miyata 2017	Fish oil feeding reverses hepatomegaly and disrupted hepatic function due to the lack of FXR signaling	FXR knock-out	FXR knock-out	C57BL/6N	C57BL/6N	1	0	0	0	1					F	Miyata 2017	Fish oil	2	%	0.02	PUFA (Fish oil)	Omega-3 polyunsaturated fatty acids (mix)	3.75	4	4.75	21.5	22	0.977273							0.0418063	0.011299	6	0.0768332	0.0045196	6
2069	Jojima 2016	Empagliflozin (an SGLT2 inhibitor), alone or in combination with linagliptin (a DPP-4 inhibitor), prevents steatohepatitis in a novel mouse model of non-alcoholic steatohepatitis and diabetes	HFD + STZ	HFD + STZ	C57BL/6J	C57BL/6J	1	0	0	0	1				59	M	Jojima 2016 _2	Linagliptin	10	mg/kg	10 mg/kg	DPP4 inhibitor (Linagliptin)	DPP4 inhibitor	1.5	3	2.25	21.6	21.9	0.986301	26.5845	26.1239	1.01763				0.0586269	0.0313322	6	0.120452	0.0261102	3	0.8	0.4	6	1.3	0.5	3	2.2	0.4
538	Siddiqui 2015	Comparative Study of the Modulation of FructoseSucrose-Induced Hepatic Steatosis by Mixed Lipid Formulations Varying in Unsaturated Fatty Acid Content.	High Sucrose diet	High Sucrose diet	C57BL/6?	C57BL/6?	1	1	0	0	2					M	Siddiqui 2015_2	Fish oil			0.9 ng	PUFA (Fish oil)	Omega-3 polyunsaturated fatty acids (mix)	1.6	0.5	1.725	21.73	22.26	0.97619							0.00045196	0.000126327	5	0.00079093	0.000252653	5
2069	Jojima 2016	Empagliflozin (an SGLT2 inhibitor), alone or in combination with linagliptin (a DPP-4 inhibitor), prevents steatohepatitis in a novel mouse model of non-alcoholic steatohepatitis and diabetes	HFD + STZ	HFD + STZ	C57BL/6J	C57BL/6J	1	0	0	0	1				59	M	Jojima 2016 _1	Empagliflozin	10	mg/kg	10 mg/kg	Empagliflozin	SGLT2 inhibitor	1.5	3	2.25	21.8	21.9	0.995434	17.7212	26.1239	0.678351				0.0447696	0.0130551	6	0.120452	0.0261102	3	1	0.1	6	1.3	0.5	3	1.3	0.5
1039	Orime 2016	Lipid-lowering agents inhibit hepatic steatosis in a non-alcoholic steatohepatitis-derived hepatocellular carcinoma mouse model	HFD + STZ	HFD + STZ	Not stated	Not stated	1	0	0	0	1					M	Orime 2016_1	Rosuvastatin			0.01% wt/wt	Statin (Rosuvastatin)	Statin	1.75	4	2.75	22	22	1	23.0325	24.6975	0.932584	87	117	0.74359	0.0689239	0.0193778	6	0.090392	0.0249143	2	3	0.73	6	3	0.49	2
538	Siddiqui 2015	Comparative Study of the Modulation of FructoseSucrose-Induced Hepatic Steatosis by Mixed Lipid Formulations Varying in Unsaturated Fatty Acid Content.	Fructose	High fructose	C57BL/6?	C57BL/6?	1	1	0	0	2		15			M	Siddiqui 2015_1	Fish oil			0.9 ng	PUFA (Fish oil)	Omega-3 polyunsaturated fatty acids (mix)	1.6	0.5	1.725	22.45	22.26	1.00854							0.00045196	0.000126327	5	0.000960415	0.000252653	5
997	Xu 2015b	Diet rich in Docosahexaenoic Acid/ Eicosapentaenoic Acid robustly ameliorates hepatic steatosis and insulin resistance in seipin deficient lipodystrophy mice	SKO deficient	SKO deficient	C57BL/6?	C57BL/6?	1	1	0	0	2					M	Xu 2015b	Docosahexaenoic acid + eicosapentaenoic acid	2	%	20 g/kg	PUFA (Omega-3 supplement)	Omega-3 polyunsaturated fatty acids (mix)	2	12	5	23	23	1	8.05	13.6	0.591912	1125	1950	0.576923	0.09	0.0288	18	0.143	0.0383	18
1907	Ushio 2013	Ezetimibe prevents hepatic steatosis induced by a high-fat but not a high-fructose diet	Fructose	High fructose	CBA/JN	CBA/JN	1	0	0	0	1					M	Ushio 2013 _2	Ezetimibe	0.008	%	Diet supplemented with 0.008% wt/wt ezetimibe	Ezetimibe	Cholesterol Absorption Inhibitor	1	4	2	23	22.4	1.02679	5.1615	6.3825	0.808696	21	34.8	0.603448	0.0150653	0.00395383	6	0.0156034	0.00395383	6
3373	Zhu 2017b	Treatment with the SGLT2 inhibitor luseogliozin improves nonalcoholic Open Access steatohepatitis in a rodent model with diabetes mellitus	HFD + STZ + Nicotinamide	HFD + STZ + Nicotinamide	C57BL/6J	C57BL/6J	1	0	0	0	1				40	M	Zhu 2017b	Luseogliflozin			0.1% in food	Luseogliflozin	SGLT2 inhibitor	1	8	3	23.5	25	0.94	11.1	14.43	0.769231	35.25	34.5	1.02174	0.0418063	0.0276768	6	0.11073	0.0276768	6
3831	Chao 2000	Adipose tissue is required for the antidiabetic, but not for the hypolipidemic, effect of thiazolidinediones	A-ZIP/F-1 transgenic mouse	A-ZIP/F-1 transgenic mouse	FVB/N	FVB/N	1	0	0	0	1					F	Chao 2000	Troglitazone			0.012 mg/gdiet, for a dose of∼3 mg/kg/d;	Troglitazone	Thiazolidinediones	1.5	2	2	23.7	23.9	0.991632	47.6745	51.5595	0.92465	14850	16950	0.876106	0.281	0.0514393	6	0.279	0.0832827	6
1802	Tsuchiya 2017	Pharmacological evaluation of pioglitazone and candesartan cilexetil in a novel mouse model of non-alcoholic steatohepatitis, modified choline-deficient, amino acid-defined diet fed low-density lipoprotein receptor knockout mice	LDL receptor knockout (LDLR-KO) + Modified choline-deficient amino acid-defined (mCDAA) diet	LDL receptor knockout (LDLR-KO) + Modified choline-deficient amino acid-defined (mCDAA) diet	Not stated	Not stated	1	1	1	0	3					M	Tsuchiya 2017_2	Candesartan cilexetil	3	mg/kg	3 mg/kg	Candesartan cilexetil	Angiotensin Receptor Blocker	1.75	7	3.5	23.8	24.6	0.96748	8.36385	8.6025	0.972258				0.412413	0.101691	10	0.45196	0.101691	5
268	Kamada 2013	Pitavastatin ameliorated the progression of steatohepatitis in ovariectomized mice fed a high fat and high cholesterol diet	Ovariectomy + HFHC	Ovariectomy + HFHC	C57BL/6J	C57BL/6J	1	0	0	0	1	1.25			31	F	Kamada 2013	Pitavastatin			5ppm in diet	Statin (Pitavastatin)	Statin	2.5	6	4	23.93	24.04	0.995424	5.19	7.99	0.649562	21	27.9	0.752688	0.090844	0.0177394	6	0.0758163	0.0316372	6	2.8	0.2	6	2.8	0.2	6	1.5	0.3
4506	Wang 2018b	Tauroursodeoxycholic acid inhibits intestinal inflammation and barrier disruption in mice with non-alcoholic fatty liver disease	High Fat Diet / HFD	High Fat Diet / HFD	C57BL/6J	C57BL/6J	1	1	1	0	3				60	M	Wang 2018b	TUDCA	1000	mg/kg	1000 mg/kg_x0001_	Tauroursodeoxycholic acid (TUDCA)	Tauroursodeoxycholic acid (TUDCA)	20	4	21	24	30	0.8	5.5	7	0.785714	34.5	46.5	0.741935	0.095	0.00735	6	0.12	0.012	6	1.3	0.49	6	2.1	1.2	9	1.3	0.49
16	Li 2017a	1,25(OH)2D3 attenuates hepatic steatosis by inducing autophagy in mice	High Fat Diet / HFD	High Fat Diet / HFD	C57BL/6?	C57BL/6?	1	0	0	0	1				40	M	Li 2017a	1,25(OH)2D3 (1,25-VD3)	1	ng/kg	1 ng/kg	Vitamin D	Vitamin D	1	4	2	24	28	0.857143							0.0007	2e-05	5	0.002	0.00067	5
3731	Liu 2014a	Metformin prevents hepatic steatosis by regulating the expression of adipose differentiation-related protein	Leptin Deficiency (ob/ob)	Leptin Deficiency (ob/ob)	C57BL/6?	C57BL/6?	1	1	0	0	2					M	Liu 2014a	Metformin	75	mg/kg	75 mg/kg/day	Metformin	Biguanide	2.25	4	3.25	24	31.5	0.761905	5.99	11.11	0.539154				0.0158186	0.00319584	8	0.0511334	0.00319584	8
5020	Shao 2018	Exenatide Delays the Progression of Nonalcoholic Fatty Liver Disease in C57BL/6 Mice, Which May Involve Inhibition of the NLRP3 Inflammasome through the Mitophagy Pathway	STZ + High fat diet (+ high chol & high sucrose)	STZ + High fat diet (+ high chol & high sucrose)	C57BL/6?	C57BL/6?	0	1	0	0	1	2.5		17	22	M	Shao 2018	Exenatide	0.02	mg/kg	10ug/kg twice daily	GLP-1 agonist (Exenatide)	GLP-1 agonist	4.5	4	5.5	24	28	0.857143	9.28	15.62	0.59411				0.2	0.025	10	0.4	0.05	10
229	Van Rooyen 2013	Pharmacological cholesterol lowering reverses fibrotic NASH in obese, diabetic mice with metabolic syndrome	High Fat + High Cholesterol Diet	High Fat + High Cholesterol Diet	Not stated	Not stated	1	0	1	0	2	0.2				F	Van Rooyen 2013_6	Atorvastatin	20	mg/kg	20 mg/kg/day	Statin (Atorvastatin)	Statin	5	8	7	24.5	26.6	0.921053	5.9	6.61	0.892587	13.5	15	0.9	0.045083	0.00731847	8	0.112877	0.0584839	4	0.2	0.282843	8	0.2	0.282843	4	0.1	0.282843
4706	Patel 2018	Coagonist of glucagon-like peptide-1 and glucagon receptors ameliorates nonalcoholic fatty liver disease	CDAA + HFD (CDAHFD)	CDAA + HFD (CDAHFD)	C57BL/6J	C57BL/6J	1	1	0	0	2				60	M	Patel 2018_1	Exenatide	0.1	mg/kg	100ug/kg	GLP-1 agonist (Exenatide)	GLP-1 agonist	2	8	4	24.5	25.5	0.960784	2.4	2.3	1.04348				0.0107341	0.00090392	6	0.0158186	0.0022598	6	2.5	0.3	6	3	0.4	6
2377	Xu 2014b	SIRT1 Mediates the Effect of GLP-1 Receptor Agonist Exenatide on Ameliorating Hepatic Steatosis	High Fat Diet / HFD	High Fat Diet / HFD	C57BL/6J	C57BL/6J	1	1	0	0	2				60	M	Xu 2014b	exenatide	0.1008	mg/kg	24 nmol/kg	GLP-1 agonist (Exenatide)	GLP-1 agonist	3	8	5	24.5	31.5	0.777778	10.1	11.55	0.874459	326.079	356.982	0.913433	0.0158	0.0064	9	0.0237	0.00311	9
548	Afrin 2017	Curcumin Ameliorates Liver Damage and Progression of Nash in Nash-Hcc Mouse Model Possibly by Modulating Hmgb1-Nf-Kappab Translocation.	HFD + STZ	HFD + STZ	C57BL/6J	C57BL/6J	1	1	1	0	3				57	M	Afrin 2017	Curcumin	100	mg/kg	100 mg/kg	Curcumin	Curcumin	2.3	4	3.3	24.6	20.7	1.18841	20.1465	27.084	0.743852										1	0.1	6	2	0.1	6	2	0.1
1579	Monteiro 2013	Oils rich in α-linolenic acid independently protect against characteristics of fatty liver disease in the Δ6-desaturase null mouse	High Fat + High Cholesterol Diet	High Fat + High Cholesterol Diet	C57BL/6J	C57BL/6J	1	0	0	0	1	2			30	M	Monteiro 2013_3	Alpha-linoleic acid	31.5	%	8, 55%	Alpha-linoleic acid	Alpha-linoleic acid	1	8	3	24.7	24.2	1.02066							0.237279	0.0875672	14	0.254227	0.0734435	3	2.05	0.745455	14	2	0.727273	3	1.05	0.381818
1579	Monteiro 2013	Oils rich in α-linolenic acid independently protect against characteristics of fatty liver disease in the Δ6-desaturase null mouse	High Fat + High Cholesterol Diet	High Fat + High Cholesterol Diet	C57BL/6J	C57BL/6J	1	0	0	0	1	2			30	M	Monteiro 2013_2	EPA/DHA	30	%	0.3	PUFA (Omega-3 supplement)	Omega-3 polyunsaturated fatty acids (mix)	1	20	6	24.9	33.9	0.734513							0.090392	0.022598	10	0.259877	0.067794	5	0.3	0.109091	10	2.7	0.981818	5	0.001	0.1
4711	Zhou 2017a	Engineered FGF19 eliminates bile acid toxicity and lipotoxicity leading to resolution of steatohepatitis and fibrosis in mice	High fat, fructose, cholesterol	High fat, fructose, cholesterol	C57BL/6J	C57BL/6J	1	0	1	0	2	2	20		40	M	Zhou 2017a	M70				M70	FGF19 analogue	4	34	12.5	25	41.5	0.60241	6.8265	10.8225	0.630769	37.5	165	0.227273	0.022598	0.0135588	9	0.186434	0.0271176	9	0.7	0.6	9	3	0.1	9	1	0.1
2784	Brown 2008	Inhibition of Stearoyl-Coenzyme A Desaturase 1 Dissociates Insulin Resistance and Obesity From Atherosclerosis	ApoB100-only, LDL-receptor knockout (Apob100/100 LDLr-/-) + SFA-enriched fat	ApoB100-only, LDL-receptor knockout (Apob100/100 LDLr-/-) + SFA-enriched fat	129SvJae-C57BL6?	Mixed	1	0	0	0	1	0.1			29	M	Brown 2008	SCD-1 oligonucleotides	7.14	mg/kg	7.14 mg/kg	SCD-1 oligonucleotides	SCD-1 inhibitor	1.5	20	6.5	25	40	0.625	5.8275	6.105	0.954545	78	172.5	0.452174	0.114685	0.0159768	8	1.63835	0.63906	8
3442	Kim 2012a	An active metabolite of oltipraz (M2) increases mitochondrial fuel oxidation and inhibits lipogenesis in the liver by dually activating AMPK	High Fat Diet / HFD	High Fat Diet / HFD	C57BL/6J	C57BL/6J	1	0	0	0	1				60	M	Kim 2012a_1	Oltipraz M2	20	mg/kg	10, 30 mg/kg/day	LXR inhibitor (Oltipraz)	LXR inhibition	2.25	4	3.25	25	32	0.78125	6.46575	10.545	0.613158				0.0440661	0.011186	16	0.0734435	0.022372	8
1802	Tsuchiya 2017	Pharmacological evaluation of pioglitazone and candesartan cilexetil in a novel mouse model of non-alcoholic steatohepatitis, modified choline-deficient, amino acid-defined diet fed low-density lipoprotein receptor knockout mice	LDL receptor knockout (LDLR-KO) + Modified choline-deficient amino acid-defined (mCDAA) diet	LDL receptor knockout (LDLR-KO) + Modified choline-deficient amino acid-defined (mCDAA) diet	Not stated	Not stated	1	1	1	0	3					M	Tsuchiya 2017_1	Pioglitazone	10	mg/kg	10 mg/kg	Thiazolidinediones (Pioglitazone)	Thiazolidinediones	1.75	7	3.5	25.7	25.5	1.00784	9.95115	10.4784	0.949682				0.412413	0.101691	10	0.553651	0.090392	5
1738	Zhu 2016	Modulation Effect of Peroxisome Proliferator-Activated Receptor Agonists on Lipid Droplet Proteins in Liver	High Fat Diet / HFD	High Fat Diet / HFD	C57BL/6J	C57BL/6J	1	0	1	0	2				60	M	Zhu 2016_2	Fenofibrate	30	mg/kg	30 mg/kg	Fibrate (Fenofibrate)	Fibrates	1.2	20	6.2	25.8	28.4	0.908451	8.1	10.7	0.757009	156	267	0.58427	0.0075	0.0021166	7	0.0123	0.00185203	4
3886	Panjwani 2013	GLP-1 Receptor Activation Indirectly Reduces Hepatic Lipid Accumulation But Does Not Attenuate Development of Atherosclerosis in Diabetic Male ApoE􏰀/􏰀 Mice	ApoE knockout (ApoE -/-) + HFD + STZ	ApoE knockout (ApoE -/-) + HFD + STZ	Not stated	Not stated	1	1	1	1	4				45	M	Panjwani 2013_2	Taspoglutide			0.4 mg once monthly S/C microtablet suspension	Taspoglutide	GLP-1 agonist	3.25	12	6.25	26	28.5	0.912281	8.7	9.8	0.887755				0.15	0.02	8	0.26	0.05	4	1.6	0.3	8	1.9	0.3	4	2.12	0.21
234	Veiga 2017	Anti-obesogenic effects of WY14643 (PPAR-alpha agonist): Hepatic mitochondrial enhancement and suppressed lipogenic pathway in diet-induced obese mice	High Fat Diet / HFD	High Fat Diet / HFD	C57BL/6?	C57BL/6?	1	1	0	0	2				50	M	Veiga 2017	WY14643	2.5	mg/kg	2.5 mg/kg	WY14643	PPARalpha-delta agonist	5.5	4	6.5	26	34	0.764706	6.16	9.82	0.627291	874	1326	0.659125	0.0200896	0.00143497	5	0.0282362	0.00253098	5
1907	Ushio 2013	Ezetimibe prevents hepatic steatosis induced by a high-fat but not a high-fructose diet	High Fat Diet / HFD	High Fat Diet / HFD	CBA/JN	CBA/JN	1	0	0	0	1				46	M	Ushio 2013 _4	Ezetimibe	0.008	%	Diet supplemented with 0.008% wt/wt ezetimibe	Ezetimibe	Cholesterol Absorption Inhibitor	1	4	2	26.2	29.5	0.888136	4.4955	5.1615	0.870968	31.2	38.4	0.8125	0.0279785	0.00658971	6	0.0317448	0.00658971	6
1453	Ivanovic 2014	Lactobacillus rhamnosus LA68 ad Lactobacillus plantarum WCFS21 differently influence metabolic and immunological parameters in high fat diet-induced hypercholesterolemie and hepatic steatosis	High Fat Diet / HFD	High Fat Diet / HFD	C57BL/6?	C57BL/6?	1	0	0	0	1				42	M	Ivanovic 2014_1	Lactobacillus rhamnosus LA68			1.14*10(^9) CFU/d	Lactobacillus rhamnosus LA68	Lactobacillus sp.	1.75	16	5.75	26.4	30.3	0.871287													0.6	0.54	5	0.8	0.83	2
1453	Ivanovic 2014	Lactobacillus rhamnosus LA68 ad Lactobacillus plantarum WCFS21 differently influence metabolic and immunological parameters in high fat diet-induced hypercholesterolemie and hepatic steatosis	High Fat Diet / HFD	High Fat Diet / HFD	C57BL/6?	C57BL/6?	1	0	0	0	1				42	M	Ivanovic 2014_2	Lactobacillus plantarum WCFS21			1.14x10^9	Lactobacillus plantarum WCFS21	Lactobacillus sp.	1.75	16	5.75	26.5	30.3	0.874587													0.4	0.54	5	0.8	0.83	3
4942	Ma 2018b	Vildagliptin Can Alleviate Endoplasmic Reticulum Stress in the Liver Induced by a High Fat Diet	High Fat + High Cholesterol Diet	High Fat + High Cholesterol Diet	C57BL/6?	C57BL/6?	1	1	0	0	2	2			42	M	Ma 2018b	Vidagliptin	50	mg/kg	50 mg/Kg	Vidagliptin	DPP4 inhibitor	2	12	5	26.5	32	0.828125	7.46	9.06	0.8234	0.9918	1.3326	0.744259	0.14	0.02	10	0.23	0.072	10
2630	Yamamoto 2016b	Glucagon-like peptide-1 analogue prevents nonalcoholic steatohepatitis in non-obese mice	Leptin Receptor Deficiency (db/db) + MCD	Leptin Receptor Deficiency (db/db) + MCD	Not stated	Not stated	1	0	1	0	2					M	Yamamoto 2016b_2	Exenatide (Synthetic exendin-4)	0.02	mg/kg	0.02 mg/kg/day	GLP-1 agonist (Exenatide)	GLP-1 agonist	1.75	8	3.75	27	33	0.818182	5.217	7.3815	0.706767	165	630	0.261905	0.10847	0.060721	8	0.154796	0.099071	8
4361	Wang 2018a	Gliptin suppress inflammatory macrophage activation to mitigate inflammation, fibrosis, oxidative stress, and vascular dysfunction in models of nonalcoholic steatohepatitis and liver fibrosis	Methionine and choline deficient diet / MCD	Methionine and choline deficient diet / MCD	C57BL/6?	C57BL/6?	1	0	0	0	1					M	Wang 2018a_2	Sitagliptin	50	mg/kg	50 mg/kg	DPP4 inhibitor (Sitagliptin)	DPP4 inhibitor	3	6	4.5	27	27	1
4361	Wang 2018a	Gliptin suppress inflammatory macrophage activation to mitigate inflammation, fibrosis, oxidative stress, and vascular dysfunction in models of nonalcoholic steatohepatitis and liver fibrosis	Methionine and choline deficient diet / MCD	Methionine and choline deficient diet / MCD	C57BL/6?	C57BL/6?	1	0	0	0	1					M	Wang 2018a_1	Linagliptin	5	mg/kg	5 mg/kg	DPP4 inhibitor (Linagliptin)	DPP4 inhibitor	3	6	4.5	27.1	27	1.0037
4317	Glien 2011	Stimatulion of fat oxidation but no sustained reduction of hepatic lipids by prolonged pharmacological inhibition of acetyl CoA carboxylase	High Fat Diet / HFD	High Fat Diet / HFD	C57BL/6N	C57BL/6N	0	0	0	0	0				60	F	Glien 2011_1	SAR210 (ACC inhibitor)	30	mg/kg	30 mg/kg	SAR210 (ACC inhibitor)	ACC inhibitor	1.5	4	2.5	27.4	26.3	1.04183	9.23	8.49	1.08716	144	136.5	1.05495	0.0553651	0.00372867	8	0.0519754	0.0044857	8
1339	Zhang 2015b	Caffeine ameliorates high energy diet-induced hepatic steatosis: sirtuin 3 acts as a bridge in the lipid metabolism pathway	High Fat + High Sucrose	High Fat + High Sucrose	C57BL/6?	C57BL/6?	1	1	0	0	2				54	M	Zhang 2015b_1	Caffeine	15	mg/kg	10, 20 mg/kg/day	Caffeine	Methylxanthine	1	18	5.5	27.5	32.5	0.846154							0.045	0.03	16	0.12	0.04	8
262	Kuo 2016	Antcin K, a Triterpenoid Compound from Antrodia camphorata, Displays Antidiabetic and Antihyperlipidemic Effects via Glucose Transporter 4 and AMP-Activated Protein Kinase Phosphorylation in Muscles	High Fat Diet / HFD	High Fat Diet / HFD	C57BL/6J	C57BL/6J	1	1	0	0	2				45	M	Kuo 2016_2	Fenofibrate	250	mg/kg	250 mg/kg/day	Fibrate (Fenofibrate)	Fibrates	3	4	4	27.55	30.43	0.905357	5.38	7.44	0.723118	270	420	0.642857	0.0473	0.0138	4	0.0793	0.0189	9
3149	Hsiao 2008	Pioglitazone retrieves hepatic antioxidant DNA repair in a mice model of high fat diet	High Fat + High Sucrose	High Fat + High Sucrose	C57BL/6?	C57BL/6?	1	0	0	0	1			15	31	M	Hsiao 2008	Pioglitazone	100	mg/kg	100 mg/kg/day	Thiazolidinediones (Pioglitazone)	Thiazolidinediones	2.25	8	4.25	27.6	26	1.06154	8.1918	9.3906	0.87234				0.173553	0.153866	5	0.200557	0.155129	5
3960	Li 2014a	Lactoferrin Dampens High-Fructose Corn Syrup-Induced Hepatic Manifestations of the Metabolic Syndrome in a Murine Model	Fructose	High fructose	C57BL/6J	C57BL/6J	1	0	0	0	1				12	M	Li 2014a_1	Lactoferrin	116.667	mg/kg	50, 100, 200 mg/kg	Lactoferrin	Iron sequestration	2	8	4	27.8267	33.23	0.837396	6.105	8.6025	0.709677	55	126	0.436508	0.0132198	0.00561184	30	0.0377387	0.0101691	10	1.7	0.556667	30	2.8	0.42	10
262	Kuo 2016	Antcin K, a Triterpenoid Compound from Antrodia camphorata, Displays Antidiabetic and Antihyperlipidemic Effects via Glucose Transporter 4 and AMP-Activated Protein Kinase Phosphorylation in Muscles	High Fat Diet / HFD	High Fat Diet / HFD	C57BL/6J	C57BL/6J	1	1	0	0	2				45	M	Kuo 2016_1	Metformin	300	mg/kg	300 mg/kg/day	Metformin	Biguanide	3	4	4	27.86	30.43	0.915544	4.66	7.44	0.626344	285	420	0.678571	0.0454	0.0126	5	0.0793	0.0189	9
229	Van Rooyen 2013	Pharmacological cholesterol lowering reverses fibrotic NASH in obese, diabetic mice with metabolic syndrome	High Fat + High Cholesterol Diet	High Fat + High Cholesterol Diet	Not stated	Not stated	1	0	1	0	2	0.2				F	Van Rooyen 2013_4	Ezetimibe	5	mg/kg	5 mg/kg/day	Ezetimibe	Cholesterol Absorption Inhibitor	5	8	7	27.9	26.6	1.04887	7.1	6.61	1.07413	13.5	15	0.9	0.0550261	0.00968339	8	0.112877	0.0584839	4	0.3	0.282843	8	0.2	0.282843	4	0.1	0.282843
2597	Saraswathi 2009	Dietary Fish Oil Exerts Hypolipidemic Effects in Lean and Insulin Sensitizing Effects in Obese LDLR2/2 Mice	LDL-receptor knockout (LDL-/-) + HFD	LDL-receptor knockout (LDL-/-) + HFD	C57BL/6J	C57BL/6J	1	0	0	0	1				39	Both	Saraswathi 2009_1	Fish oil	6	%	0.06	PUFA (Fish oil)	Omega-3 polyunsaturated fatty acids (mix)	2.5	6	4	27.9	26.8	1.04104	6.549	6.4935	1.00855	102	138	0.73913	0.0169	0.00386	8	0.0452	0.0116	8
4695	Ma 2018a	Functional interplay between liver X receptor and AMP-activated protein kinase alpha inhibits atherosclerosis in apolipoprotein E-deficient mice - a new anti-atherogenic strategy	ApoE knockout (ApoE -/-) + HFHC + T0901317 (LXR agonist)	ApoE knockout (ApoE -/-) + HFHC + T0901317 (LXR agonist)	C57BL/6J	C57BL/6J	1	1	1	0	3	0.5			41	M	Ma 2018a_2	Metformin	100	mg/kg	100mg/kg	Metformin	Biguanide	2.25	16	6.25	27.93	28.94	0.9651							0.0813528	0.0875108	15	0.34462	0.306316	15
878	Konuma 2015	Eicosapentaenoic Acid Ameliorates Non- Alcoholic Steatohepatitis in a Novel Mouse Model Using Melanocortin 4 Receptor- Deficient Mice	MC4R KO + Western diet	MC4R KO + Western diet	C57BL/6J	C57BL/6J	1	1	1	0	3				41	M	Konuma 2015	Eicosapentaenoic acid	5	%	5% wt/wt	Eicosapentaenoic acid	Eicosapentaenoic acid	2	24	8	28	56	0.5	6.61	7.45	0.887248	555	645	0.860465	0.0489	0.00706	10	0.0802	0.00454	7	1.7	0.526	7	3	0.1	10	1	0.5
4666	Yang 2018a	Antihyperlipidemic and hepatoprotective activities of polysaccharide fraction from Cyclocarya paliurus in high-fat emulsion-induced hyperlipidaemic mice	High-fat emulsion	High-fat emulsion	ICR	ICR	1	1	0	0	2					F	Yang 2018a	Simvastatin			5 ml/kg (infusion)	Statin (Simvastatin)	Statin	1	4	2	28	31	0.903226							0.16	0.015	10	0.23	0.02	10
3081	Cao 2016	Modulation of Gut Microbiota by Berberine Improves Steatohepatitis in High-Fat Diet-Fed BALB/C Mice	High Fat Diet / HFD	High Fat Diet / HFD	BALB/c	BALB/c	1	1	0	0	2				31	M	Cao 2016	Berberine	200	mg/kg	200 mg/kg/day	Berberine	Berberine	4.25	8	6.25	28.64	30.7	0.932899	6.13	7.56	0.810847	0.46	1.67	0.275449							0.82	0.75	11	2.1	0.74	10
4695	Ma 2018a	Functional interplay between liver X receptor and AMP-activated protein kinase alpha inhibits atherosclerosis in apolipoprotein E-deficient mice - a new anti-atherogenic strategy	ApoE knockout (ApoE -/-) + HFHC	ApoE knockout (ApoE -/-) + HFHC	C57BL/6J	C57BL/6J	1	1	1	0	3	0.5			41	M	Ma 2018a_1	Metformin	100	mg/kg	100mg/kg	Metformin	Biguanide	2.25	16	6.25	28.78	28.62	1.00559							0.0734435	0.0656359	15	0.124289	0.0875673	15
3886	Panjwani 2013	GLP-1 Receptor Activation Indirectly Reduces Hepatic Lipid Accumulation But Does Not Attenuate Development of Atherosclerosis in Diabetic Male ApoE􏰀/􏰀 Mice	ApoE knockout (ApoE -/-) + HFD + STZ	ApoE knockout (ApoE -/-) + HFD + STZ	Not stated	Not stated	1	1	1	1	4				45	M	Panjwani 2013_1	Metformin	400	mg/kg	400mg/kg/day in drinking water	Metformin	Biguanide	3.25	12	6.25	28.8	28.5	1.01053	7.5	9.8	0.765306				0.29	0.02	8	0.26	0.05	4	1.9	0.3	8	1.9	0.3	4	1.75	0.28
1907	Ushio 2013	Ezetimibe prevents hepatic steatosis induced by a high-fat but not a high-fructose diet	Fructose	High fructose	CBA/JN	CBA/JN	1	0	0	0	1					M	Ushio 2013 _1	Ezetimibe	0.008	%	Diet supplemented with 0.008% wt/wt ezetimibe	Ezetimibe	Cholesterol Absorption Inhibitor	1	8	3	28.9	28.5	1.01404	5.106	5.1615	0.989247	183	97.8	1.87117	0.0322829	0.00645657	4	0.0328209	0.00538048	4
1430	Kajikawa 2009	Highly purified eicosapentaenoic acid prevents the progression of hepatic steatosis by repressing monounsaturated fatty acid syntehsis in high-fat/high-sucrose diet-fed mice	High Fat + High Cholesterol + High Sucrose Diet	High Fat + High Cholesterol + High Sucrose Diet	C57BL/6J	C57BL/6J	1	1	0	0	2	0.15		30	41	M	Kajikawa 2009_1	Pioglitazone	30	mg/kg	30 mg/kg	Thiazolidinediones (Pioglitazone)	Thiazolidinediones	1.2	2	1.7	29	28.3	1.02473							0.067794	0.0191744	8	0.033897	0.00639184	8
1738	Zhu 2016	Modulation Effect of Peroxisome Proliferator-Activated Receptor Agonists on Lipid Droplet Proteins in Liver	High Fat Diet / HFD	High Fat Diet / HFD	C57BL/6J	C57BL/6J	1	0	1	0	2				60	M	Zhu 2016_1	Pioglitazone	10	mg/kg	10 mg/kg body weight	Thiazolidinediones (Pioglitazone)	Thiazolidinediones	1.2	20	6.2	29	28.4	1.02113	9.2	10.7	0.859813	136.5	267	0.511236	0.0109	0.00291033	7	0.0123	0.00185203	3
2821	Rahman 2016	C/EBP homologous protein modulates liraglutidemediated attenuation of non-alcoholic steatohepatitis	High fat, fructose, cholesterol	High fat, fructose, cholesterol	C57BL/6J	C57BL/6J	1	0	0	0	1	0.2			45	M	Rahman 2016_2	Liraglutide	0.2	mg/kg	0.2 mg/kg	GLP-1 agonist (Liraglutide)	GLP-1 agonist	4.25	4	5.25	29	32.5	0.892308	8.214	11.1	0.74
1279	Wang 2014	Novel effect of ezetimibe to inhibit the development of non-alcoholic fatty liver disease in Fatty Liver Shionogi mouse	Fatty liver Shionogi FLS-ob/ob mice	Fatty liver Shionogi FLS-ob/ob mice	FLS	FLS	1	1	0	0	2					M	Wang 2014	Ezetimibe	7	mg/kg	7 mg/kg/day	Ezetimibe	Cholesterol Absorption Inhibitor	5	4	6	29.5	29.2	1.01027
157	Kim 2017	Prevention and Treatment Effect of Evogliptin on Hepatic Steatosis in High-Fat-Fed Animal Models.	High Fat Diet / HFD	High Fat Diet / HFD	C57BL/6J	C57BL/6J	1	1	1	0	3				60	M	Kim 2017_1	Evogliptin	200	mg/kg	100, 300 mg/kg	Evogliptin	DPP4 inhibitor	1.6	16	5.6	29.58	48.84	0.605651	11.75	17	0.691176	180	1050	0.171429	0.0197732	0.0127834	16	0.0711837	0.0159792	8
2263	Lee 2015b	Peroxisome proliferator-activated receptor-delta agonist ameliorated inflammasome activation in nonalcoholic fatty liver disease	High Fat Diet / HFD + LPS	High Fat Diet / HFD + LPS	C57BL/6J	C57BL/6J	1	1	1	0	3				60	M	Lee 2015b	GW501516	3	mg/kg	3 mg/kg	GW501516	PPARalpha-delta agonist	1	12	4	29.87	30.98	0.96417	10.545	9.99	1.05556										0.48	0.24	5	1.84	0.48	5
3404	Ma 2008	Probiotics Improve High Fat Diet-induced Hepatic Steatosis and Insulin Resistance by Increasing Hepatic NKT cells	CD1d -/- + HFD	CD1d -/- + HFD	C57BL/6J	C57BL/6J	1	0	1	0	2				60	M	Ma 2008_1	VSL#3 probiotic			1.5*10^9 colonies/mouse/day	Probiotic (VSL#3)	Probiotic (mix)	3.75	4	4.75	30	42	0.714286	11.1	13.986	0.793651				0.0255357	0.00297164	3	0.0316485	0.00743474	3	2.13	0.64	3	2.25	0.71	3
18	Franko 2017	Bezafibrate ameliorates diabetes via reduced steatosis and improved hepatic insulin sensitivity in diabetic TallyHo mice	TallyHo mice	TallyHo mice	TALLYHO	TALLYHO	0	0	0	0	0						Franko 2017	Bezafibrate	0.5	%	0.5% weight	Fibrate (Bezafibrate)	Fibrates	2.25	8	4.25	30	37	0.810811	5.55	18.87	0.294118	60	300	0.2	0.009	0.001	8	0.039	0.013	8
1646	Rong 2009	An Adipose Tissue-Independent Insulin-Sensitizing Action of Telmisartan: a Study in Lipodystrophic Mice	A-ZIP/F-1 transgenic mouse	A-ZIP/F-1 transgenic mouse	FVB/N	FVB/N	1	0	0	0	1					M	Rong 2009_2	Telmisartan	3	mg/kg	3 mg/kg	ARB (Telmisartan)	Angiotensin Receptor Blocker	4.25	7	6	30	30	1	9.435	9.1575	1.0303	195	870	0.224138	0.0531053	0.0179366	7	0.0847425	0.0358732	7
1646	Rong 2009	An Adipose Tissue-Independent Insulin-Sensitizing Action of Telmisartan: a Study in Lipodystrophic Mice	A-ZIP/F-1 transgenic mouse	A-ZIP/F-1 transgenic mouse	FVB/N	FVB/N	1	0	0	0	1					M	Rong 2009_1	Telmisartan	1	mg/kg	1 mg/kg	ARB (Telmisartan)	Angiotensin Receptor Blocker	4.25	7	6	30	30	1							0.0802229	0.0179366	7	0.0779631	0.0089683	7
4903	Chen 2018a	A combination of Lactobacillus mali APS1 and dieting improved the efficacy of obesity treatment via manipulating gut microbiome in mice	High Fat Diet / HFD	High Fat Diet / HFD	C57BL/6J	C57BL/6J	1	1	0	0	2				60	M	Chen 2018a	Lactobacillus mali APS1			5×10^8 CFU	Lactobacillus mali APS1	Lactobacillus sp.	3.5	3	4.25	30	33	0.909091	5.439	5.4945	0.989899	78	89.4	0.872483	0.0214681	0.0045196	8	0.0265527	0.0033897	8
3823	Camporez 2013	Cellular Mechanisms by Which FGF21 ImprovesInsulin Sensitivity in Male Mice	High Fat Diet / HFD	High Fat Diet / HFD	C57BL/6J	C57BL/6J	1	0	0	0	1				55	M	Camporez 2013	FGF21	1	mg/kg	1 mg/kg/day	FGF21	Peptide hormone	3	1	3.25	30.1	25.9	1.16216	5.57775	6.327	0.881579	50.4	91.8	0.54902	0.004	0.00069	6	0.0158	0.0056	6
1922	Tajima 2013	Metformin prevents liver tumorigenesis induced by high-fat diet in C57Bl/6 mice	High Fat Diet / HFD	High Fat Diet / HFD	C57BL/6?	C57BL/6?	1	1	1	0	3				57	M	Tajima 2013_2	Metformin	250	mg/kg	250 mg/kg/day	Metformin	Biguanide	2	8	4	30.5	38	0.802632	6.771	6.9375	0.976				0.0418	0.0137	6	0.096	0.0277	6
1907	Ushio 2013	Ezetimibe prevents hepatic steatosis induced by a high-fat but not a high-fructose diet	High Fat Diet / HFD	High Fat Diet / HFD	CBA/JN	CBA/JN	1	0	0	0	1				46	M	Ushio 2013 _3	Ezetimibe	0.008	%	Diet supplemented with 0.008% wt/wt ezetimibe	Ezetimibe	Cholesterol Absorption Inhibitor	1	8	3	30.9	35.7	0.865546	4.9395	6.3825	0.773913	121.8	214.8	0.567039	0.0774789	0.0150653	4	0.105995	0.00753267	4
3049	Witek 2009	Pan-Caspase Inhibitor VX-166 Reduces Fibrosis in an Animal Model of Nonalcoholic Steatohepatitis	Leptin Receptor Deficiency (db/db) + MCD	Leptin Receptor Deficiency (db/db) + MCD	C57BL/6J	C57BL/6J	1	0	0	0	1					M	Witek 2009_4	VX-166 (Pan-caspase inhibitor)	6	mg/kg	6mg/kg	Pan-caspase inhibitor (VX-166)	Caspase inhibitor	2.5	8	4.5	31	33	0.939394							0.022598	0.0285175	13	0.0192083	0.0151587	5	1.8	1.4	13	2	0.1	5	2.4	1.8
3995	McCommis 2017	Targeting the Mitochondrial Pyruvate Carrier Attenuates Fibrosis in a Mouse Model of Nonalcoholic Steatohepatitis	High fat, fructose, cholesterol	High fat, fructose, cholesterol	C57BL/6J	C57BL/6J	1	1	1	0	3	2	20		40	M	McCommis 2017	MSDC‐0602			331 ppm	MSDC‐0602	Thiazolidinediones	2.875	12	5.875	31	38	0.815789							0.0994	0.0284	10	0.0858	0.0177	10	2.7	0.32	10	3	0.1	10	2.27	0.2
1579	Monteiro 2013	Oils rich in α-linolenic acid independently protect against characteristics of fatty liver disease in the Δ6-desaturase null mouse	High Fat + High Cholesterol Diet	High Fat + High Cholesterol Diet	C57BL/6J	C57BL/6J	1	0	0	0	1	2			30	M	Monteiro 2013_4	EPA/DHA	30	%	0.3	PUFA (Omega-3 supplement)	Omega-3 polyunsaturated fatty acids (mix)	1	8	3	31	24.2	1.28099							0.0734435	0.011299	7	0.254227	0.0734435	4	0.001	0.1	7	2	0.727273	4	0.5	0.181818
2821	Rahman 2016	C/EBP homologous protein modulates liraglutidemediated attenuation of non-alcoholic steatohepatitis	CCAAT/enhancer-binding protein homologous protein (CHOP) knockout (CHOP-/-) + FFC	CCAAT/enhancer-binding protein homologous protein (CHOP) knockout (CHOP-/-) + FFC	C57BL/6J	C57BL/6J	1	0	0	0	1	0.2			45	M	Rahman 2016_1	Liraglutide	0.2	mg/kg	0.2 mg/kg	GLP-1 agonist (Liraglutide)	GLP-1 agonist	4.25	4	5.25	31	37	0.837838	8.991	9.1575	0.981818
3316	Xu 2015a	Apple Polyphenols Decrease Atherosclerosis and Hepatic Steatosis in ApoE-/- Mice through the ROS/MAPK?NF-kB Pathway	ApoE knockout (ApoE -/-) + Western Diet	ApoE knockout (ApoE -/-) + Western Diet	C57BL/6J	C57BL/6J	1	1	0	0	2	0.2			42	M	Xu 2015a	Atorvastatin	10	mg/kg	10 mg/kg/day	Statin (Atorvastatin)	Statin	2.8	12	5.8	31	32.5	0.953846							0.0110769	0.00592927	10	0.01625	0.00494106	10
4669	Jadhav 2018	Reversal of metabolic disorders by pharmacological activation of bile acid receptors TGR5 and FXR	ApoE knockout (ApoE -/-) + Western Diet	ApoE knockout (ApoE -/-) + Western Diet	C57BL/6J	C57BL/6J	1	0	0	0	1	0.2			42	M	Jadhav 2018_2	INT-767	30	mg/kg	30 mg/kg	FXR/TGR5 agonist (INT-767)	FXR agonist		12		31	32	0.96875	9.7125	9.1575	1.06061				0.0237279	0.011186	8	0.0468909	0.00959285	8
5217	Xu 2018	Ginsenoside Rg1 Protects against Non-alcoholic Fatty Liver Disease by Ameliorating Lipid Peroxidation, Endoplasmic Reticulum Stress, and Inflammasome Activation	High Fat Diet / HFD	High Fat Diet / HFD	C57BL/6?	C57BL/6?	1	1	0	0	2				60	F	Xu 2018	Metformin	150	mg/kg	150 mg/kg	Metformin	Biguanide	2	4	3	31	39	0.794872							2	0.56	8	3	0.56	8
5458	Finn 2019	Intestinal TGR5 agonism improves hepatic steatosis and insulin sensitivity in Western diet-fed mice	High fat, sucrose, cholesterol	High fat, sucrose, cholesterol	C57BL/6?	C57BL/6?	1	0	0	0	1	0.2		23	45	M	Finn 2019	Liraglutide	0.4	mg/kg	400 ug/kg	GLP-1 agonist (Liraglutide)	GLP-1 agonist	4.75	4.85714	5.96429	31.4	36	0.872222	10.2675	12.21	0.840909	60	283.5	0.21164	0.146887	0.0607434	10	0.237279	0.025016	10
4173	Zhou 2010	Rosiglitazone promotes fatty acyl CoA accumulation and excessive glycogen storage in livers of mice without adiponectin	Adipo-/- + HFD	Adipo-/- + HFD	C57BL/6J	C57BL/6J	1	0	0	0	1				50	M	Zhou 2010_1	Rosiglitazone	20	mg/kg	20 mg/kg	Thiazolidinediones (Rosiglitazone)	Thiazolidinediones	2.5	2	3	31.62	31.29	1.01055	8.7	10.76	0.80855	130.38	182.64	0.713863	0.06	0.0132287	7	0.075	0.010583	7
3179	Wada 2013	Eplerenone ameliorates the phenotypes of metabolic syndrome with NASH in liver-specific SREBP-1c Tg mice fed high-fat and high-fructose diet	SREBP-1c Tg + High-fat and high-fructose diet	SREBP-1c Tg + High-fat and high-fructose diet	C57BL/6?	C57BL/6?	1	1	0	0	2		30		60	M	Wada 2013	Eplerenone	1.67	mg/g	1.67 mg/g	Eplerenone	Angiotensin Receptor Blocker		12		31.9	34.2	0.932749	5.994	6.105	0.981818	127.5	232.5	0.548387	0.011299	0.00553536	6	0.0280215	0.0210344	6
319	Okada 2009	The a-glucosidase inhibitor acarbose prevents obesity and simple steatosis in suquestosome 1/A170/p62 deficient mice	SQSTM1/A170/p62 Deficiency	SQSTM1/A170/p62 Deficiency	C57BL/6?	C57BL/6?	1	0	0	0	1					M	Okada 2009	Acarbose	800	mg/kg	800 mg/kg	Acarbose	Alpha glucosidase inhibitor	3.5	10	6	32	41	0.780488	6.66	7.49	0.889186				0.00502178	0.00251089	8	0.0508455	0.0268733	7
1579	Monteiro 2013	Oils rich in α-linolenic acid independently protect against characteristics of fatty liver disease in the Δ6-desaturase null mouse	High Fat + High Cholesterol Diet	High Fat + High Cholesterol Diet	C57BL/6J	C57BL/6J	1	0	0	0	1	2			30	M	Monteiro 2013_1	Alpha-linoleic acid	31.5	%	8, 55%	Alpha-linoleic acid	Alpha-linoleic acid	1	20	6	32.1	33.9	0.946903							0.272306	0.0536702	20	0.259877	0.067794	5	2.65	0.963636	20	2.7	0.981818	5	2.05	0.745455
4928	Borges 2018	Vitamin D Deficiency Increases Lipogenesis and Reduces Beta-Oxidation in the Liver of Diet-Induced Obese Mice	High Fat Diet / HFD	High Fat Diet / HFD	C57BL/6?	C57BL/6?	1	1	1	0	3				50	M	Borges 2018	Vitamin D				Vitamin D	Vitamin D	3	8	5	32.2	32.7	0.984709				1460	1117	1.30707	0.0022	0.0007	6	0.0022	0.0013	6
4459	Mencarelli 2012	VSL#3 Resets Insulin Signaling and Protects against NASH and Atherosclerosis in a Model of Genetic Dyslipidemia and Intestinal Inflammation	ApoE knockout (ApoE -/-) + dextran sulfate	ApoE knockout (ApoE -/-) + dextran sulfate	C57BL/6J	C57BL/6J	1	1	1	0	3					M	Mencarelli 2012_2	VSL#3 probiotic			25x10^8	Probiotic (VSL#3)	Probiotic (mix)	9	12	12	32.3	32.8	0.984756	8.7024	8.5026	1.0235	825	1395	0.591398							2.2	1.21	12	2	0.69	12	1.3	0.52
4459	Mencarelli 2012	VSL#3 Resets Insulin Signaling and Protects against NASH and Atherosclerosis in a Model of Genetic Dyslipidemia and Intestinal Inflammation	ApoE knockout (ApoE -/-)	ApoE knockout (ApoE -/-)	C57BL/6J	C57BL/6J	1	1	1	0	3					M	Mencarelli 2012_1	VSL#3 probiotic			25x10^8	Probiotic (VSL#3)	Probiotic (mix)	9	12	12	32.4	31.4	1.03185	7.8033	8.35275	0.934219	870	1170	0.74359							2.4	0.87	12	2.6	0.35	12	1.5	0.52
1911	Samson 2011	Exenatide decreases hepatic fibroblast growth factor 21 resistance in non-alcoholic fatty liver disease in a mouse model of obesity and in a randomised controlled trial	High Fat Diet / HFD	High Fat Diet / HFD	C57BL/6J	C57BL/6J	1	0	0	0	1				60	M	Samson 2011	Exendin-4			Treatment was by continuous delivery of exendin 4 in PBS at a concentration of 100 μg/ml with 0.1% mouse serum albumin for 28 days using a subcutaneous mini-osmotic pump, which delivers an estimated 0.5 nmol per day of exendin 4, resulting in pharmacological plasma levels averaging 1,734±862 pmol/l (n=4) at 2 weeks post-implantation.	GLP-1 agonist (Exenatide)	GLP-1 agonist	4.5	4	5.5	33	31	1.06452	7	8	0.875	170	155	1.09677	0.102397	0.0847425	4	0.218918	0.0706187	4
5164	Echeverria 2018	Attenuation of High-Fat Diet-Induced Rat Liver Oxidative Stress and Steatosis by Combined Hydroxytyrosol- (HT-) Eicosapentaenoic Acid Supplementation Mainly Relies on HT	High Fat Diet / HFD	High Fat Diet / HFD	C57BL/6J	C57BL/6J	1	1	1	0	3				60	M	Echeverria 2018	Eicosapentaenoic acid	50	mg/kg	50 mg/kg	Eicosapentaenoic acid	Eicosapentaenoic acid	0.75	12	3.75	33.13	37.15	0.89179							0.0640653	0.0194569	9	0.0880079	0.0244397	9	1.4	0.24	9	1.8	0.3	9
3890	Oosterveer 2009	High Fat Feeding Induces Hepatic Fatty Acid Elongation in Mice	High Fat Diet / HFD	High Fat Diet / HFD	C57BL/6J	C57BL/6J	1	0	0	0	1					M	Oosterveer 2009	Fish oil	42	%	42% beef fat in HFD replaced with fish oil	PUFA (Fish oil)	Omega-3 polyunsaturated fatty acids (mix)	3	6	4.5	33.4	30.5	1.09508							0.00462	0.00321238	7	0.0166	0.00535397	7
4306	Meng 2016a	A Recipe Composed of Chinese Herbal Active Components Regulates Hepatic Lipid Metabolism of NAFLD In Vivo and In Vitro	High Fat Diet / HFD	High Fat Diet / HFD	C57BL/6J	C57BL/6J	1	1	0	0	2				35	M	Meng 2016a_1	Rosiglitazone	0.6	mg/kg	0.67 mg/kg	Thiazolidinediones (Rosiglitazone)	Thiazolidinediones		4		33.54	45.85	0.731516	7.7	9.2	0.836957	82.5	96	0.859375	0.0734435	0.0022598	9	0.0949116	0.0022598	9	1.89	0.6	9	2.67	0.5	9	0.89	0.33
2772	Haczeyni 2017a	Obeticholic Acid Improves Adipose Morphometry and Inflammation and Reduces Steatosis in Dietary but not Metabolic Obesity in Mice	foz/foz mice + Atherogenic Diet	foz/foz mice + Atherogenic Diet	NOD.B10	NOD.B10	1	0	1	0	2	0.19			45	F	Haczeyni 2017a_1	Obeticholic acid	1	mg/kg	1 mg/kg/day	FXR agonist (Obetacholic acid)	FXR agonist	3	24	9	34	43	0.790698	7	8	0.875	90	75	1.2	0.0773089	0.0142723	9	0.0820658	0.01784	9	2.6	0.337	9	2.56	0.674	9	1.2	0.67
2566	Bojic 2014	PPAR𝛿 activation attenuates hepatic steatosis in Ldlr - / - mice by enhanced fat oxidation, reduced lipogenesis, and improved insulin sensitivity	LDL-receptor knockout (LDL-/-) + High Fat High Cholesterol Diet	LDL-receptor knockout (LDL-/-) + High Fat High Cholesterol Diet	C57BL/6J	C57BL/6J	1	0	0	0	1	0.2			42	M	Bojic 2014	GW1516	3	mg/kg	3 mg/kg/day	GW1516	PPARalpha-delta agonist	3	12	6	34	42	0.809524	4.2	4.3	0.976744	24	66	0.363636	0.0960415	0.0195699	24	0.146887	0.0469688	24
3511	He 2016	Glp-1 Analogue Improves Hepatic Lipid Accumulation by Inducing Autophagy Via Ampk_Mtor Pathway.	High Fat Diet / HFD	High Fat Diet / HFD	C57BL/6?	C57BL/6?	0	0	0	0	0					M	He 2016	Liraglutide	0.1	mg/kg	0.1 mg/kg	GLP-1 agonist (Liraglutide)	GLP-1 agonist	6	12	9	34	49.5	0.686869	9	9.5	0.947368				0.62	0.15	13	0.89	0.2	10
4570	Shen 2018a	Pioglitazone attenuates aging-related disorders in aged apolipoprotein E deficient mice	ApoE knockout (ApoE -/-)	ApoE knockout (ApoE -/-)	C57BL/6?	C57BL/6?	0	1	0	0	1					M	Shen 2018a	Pioglitazone	10	mg/kg	10mg/kg	Thiazolidinediones (Pioglitazone)	Thiazolidinediones	11	16	15	34	32.5	1.04615	4.8285	5.2725	0.915789				0.0305073	0.00714605	10	0.0418063	0.00357048	10
3879	Parlevliet 2012	GLP-1 Receptor Activation Inhibits VLDL Production and Reverses Hepatic Steatosis by Decreasing Hepatic Lipogenesis in High-Fat-Fed APOE3-Leiden Mice	High Fat Diet / HFD	High Fat Diet / HFD	C57BL/6J-CBA/J	Mixed	1	0	0	0	1				44	M	Parlevliet 2012_2	Exendin-4	0.0325	mg/kg	0.015, .05 mg/kg/day	GLP-1 agonist (Exenatide)	GLP-1 agonist	4.5	4	5.5	34.1	38	0.897368	9.35	12.4	0.754032	183.75	360	0.510417	0.22	0.134722	12	0.425	0.122474	6
565	Ahn 2008	Dietary Resveratrol Alters Lipid Metabolism-Related Gene Expression of Mice on an Atherogenic Diet.	High Fat + High Cholesterol Diet	High Fat + High Cholesterol Diet	C57BL/6J	C57BL/6J	1	0	0	0	1	1			18	M	Ahn 2008	Resveratrol	0.0125	%	0.0125% diet weight	Polyphenol (Resveratrol)	Polyphenol (Resveratrol)	1.6	8	3.6	34.5	37.5	0.92							0.00997702	0.000178524	10	0.0114007	0.00132198	10
2849	Falach-Malik 2016	N-Acetyl-L-Cysteine inhibits the development of glucose intolerance and hepatic steatosis in diabetes-prone mice	High Fat Diet / HFD	High Fat Diet / HFD	C57BL/6?	C57BL/6?	1	0	1	0	2				60	M	Falach-Malik 2016_1	N-acetylcysteine	315	mg/kg	60, 200, 400 600 mg/kg/day	N-acetylcysteine	N-acetylcysteine	1.5	11	4.25	34.5	38	0.907895	9.1575	9.435	0.970588				0.155	0.05025	36	0.245	0.12	9
3339	Ni 2015	Astaxanthin prevents and reverses diet-induced insulin resistance and steatohepatitis in mice: A comparison with vitamin E	High fat, high cholesterol, & cholate diet	High fat, high cholesterol, & cholate diet	C57BL/6J	C57BL/6J	1	0	0	0	1	1.25			60	M	Ni 2015	Vitamin E	0.02	%	0.0002	Vitamin E	Vitamin E	1.6	12	4.6	34.6	34	1.01765	8.6025	9.7125	0.885714	60	97.5	0.615385	0.620315	0.228822	8	0.723136	0.0594426	8
4173	Zhou 2010	Rosiglitazone promotes fatty acyl CoA accumulation and excessive glycogen storage in livers of mice without adiponectin	High Fat Diet / HFD	High Fat Diet / HFD	C57BL/6J	C57BL/6J	1	0	0	0	1				50	M	Zhou 2010_2	Rosiglitazone	20	mg/kg	20 mg/kg	Thiazolidinediones (Rosiglitazone)	Thiazolidinediones	2.5	2	3	34.61	32.92	1.05134	7.33	11.93	0.614417	98.22	162.3	0.605176	0.091	0.0555607	7	0.059	0.01852	7
225	Van den Hoek 2013	APOE*3Leiden.CETP transgenic mice as model for pharmaceutical treatment of the metabolic syndrome	High Fat + High Fructose Diet	High Fat + High Fructose Diet	C57BL/6J-CBA/J	Mixed	1	0	0	0	1				60	M	Van den Hoek 2013_3	Liraglutide	0.2	mg/kg	0.2 mg/kg	GLP-1 agonist (Liraglutide)	GLP-1 agonist	6	5	7.25	34.7	43.2	0.803241	9	10.5	0.857143	337.5	1012.5	0.333333	0.0934427	0.0696746	13	0.170615	0.112334	3
4557	Bahirat 2018	Co-administration of APD668, a G protein-coupled receptor 119 agonist and linagliptin, a DPPIV inhibitor, prevents progression of steatohepatitis in mice fed on a high trans-fat diet	High fat, fructose, cholesterol (trans-fat)	High fat, fructose, cholesterol	C57BL/6?	C57BL/6?	1	1	0	0	2	2	22		40	M	Bahirat 2018	Linagliptin	12.5	mg/kg	12.5mg/kg	DPP4 inhibitor (Linagliptin)	DPP4 inhibitor	5	4	6	34.7	36.3	0.955923	9.324	11.1	0.84	42	60	0.7	0.202591	0.0708492	7	0.369929	0.00746864	7
3424	Yang 2014a	Alpha-lipoic acid attenuates insulin resistance and improves glucose metabolism in high fat diet-fed mice	High Fat Diet / HFD	High Fat Diet / HFD	C57BL/6J	C57BL/6J	1	0	0	0	1				60	M	Yang 2014a	Metformin	300	mg/kg	300 mg/kg/day	Metformin	Biguanide	1.8	24	7.8	35	50.05	0.699301	8.01	11.86	0.675379	63.72	142.68	0.446594							0.6	0.24	15	2.2	0.88	15	0.4	0.33
3404	Ma 2008	Probiotics Improve High Fat Diet-induced Hepatic Steatosis and Insulin Resistance by Increasing Hepatic NKT cells	High Fat Diet / HFD	High Fat Diet / HFD	C57BL/6J	C57BL/6J	1	0	1	0	2				60	M	Ma 2008_2	VSL#3 probiotic			1.5*10^9 colonies/mouse/day	Probiotic (VSL#3)	Probiotic (mix)	3.75	4	4.75	35	33	1.06061	13.32	13.875	0.96				0.0200331	0.0115137	3	0.0403939	0.00769462	3	1	0.94	3	2.8	0.42	3
1736	Zhou 2017b	The anti-diabetic drug exenatide, a glucagon-like peptide-1 receptor agonist, counteracts hepatocarcinogenesis through cAMP–PKA–EGFR–STAT3 axis	High Fat High Carbohydrate diet + DEN	High Fat High Carbohydrate diet + DEN	C57BL/6N	C57BL/6N	1	1	1	1	4				58	M	Zhou 2017b	Exenatide	0.042	mg/kg	10 nmol/kg body weight	GLP-1 agonist (Exenatide)	GLP-1 agonist	2.7	23	8.45	35	45.5	0.769231	6.5	7	0.928571	54	97.5	0.553846	0.0214681	0.00178524	10	0.0440661	0.00714097	10
4685	Tolbol 2018	Metabolic and hepatic effects of liraglutide, obeticholic acid and elafibranor in diet-induced obese mouse models of biopsy-confirmed nonalcoholic steatohepatitis	High fat, fructose, cholesterol	High fat, fructose, cholesterol	C57BL/6J	C57BL/6J	0	1	0	0	1	2	20		40	M	Tolbol 2018_2	Elafibranor / GFT505	120	mg/kg	120 mg/kg	PPARalpha-delta agonist (Elafibranor)	PPARalpha-delta agonist	9	8	11	35	39	0.897436
5343	Kim 2018b	Ginseng seed oil ameliorates hepatic lipid accumulation in¬†vitro and in¬†vivo	High Fat Diet / HFD	High Fat Diet / HFD	C57BL/6J	C57BL/6J	1	0	0	0	1				60		Kim 2018b	Metformin	300	mg/kg	300mg/kg	Metformin	Biguanide	1.5	12	4.5	35	45	0.777778	9.99	13.0425	0.765957	45	112.5	0.4	0.0067794	0.00135588	8	0.00824827	0.00056495	7
345	Zheng 2017	SIRT1/HSF1/HSP Pathway Is Essential for Exenatide-Alleviated, Lipid-Induced Hepatic Endoplasmic Reticulum Stress	High Fat Diet / HFD	High Fat Diet / HFD	C57BL/6J	C57BL/6J	1	1	0	0	2				54	M	Zheng 2017	Exenatide (Synthetic exendin-4)	0.1008	mg/kg	24 nmol/kg/day	GLP-1 agonist (Exenatide)	GLP-1 agonist	4.6	4	5.6	35.5	39	0.910256	8	11	0.727273				0.110504	0.0235572	6	0.145757	0.035243	6
1213	Zhu 2014	Effects and mechanisms of resveratrol on the amelioration of oxidative stress and hepatic steatosis in KKAy mice	KK-Ay	KK-Ay	KK-Ay	KK-Ay	1	1	0	0	2					M	Zhu 2014_1	Resveratrol	3	%	2 g/kg diet	Polyphenol (Resveratrol)	Polyphenol (Resveratrol)	9	12	12	35.5	39	0.910256							0.0205	0.0035	20	0.026	0.004	10
3879	Parlevliet 2012	GLP-1 Receptor Activation Inhibits VLDL Production and Reverses Hepatic Steatosis by Decreasing Hepatic Lipogenesis in High-Fat-Fed APOE3-Leiden Mice	High Fat Diet / HFD	High Fat Diet / HFD	C57BL/6J-CBA/J	Mixed	1	0	0	0	1				44	M	Parlevliet 2012_1	CNTO3649	2	mg/kg	1, 3 mg/kg/day	CNTO3649	GLP-1 agonist	4.5	4	5.5	35.5	38	0.934211	9.35	12.4	0.754032	262.5	360	0.729167	0.315	0.0918559	12	0.425	0.122474	6
546	Feng 2015	Crude Triterpenoid Saponins from Ilex Latifolia (Da Ye Dong Qing) Ameliorate Lipid Accumulation by Inhibiting Srebp Expression Via Activation of Ampk in a Non-Alcoholic Fatty Liver Disease Model.	High Fat Diet / HFD	High Fat Diet / HFD	C57BL/6J	C57BL/6J	1	0	0	0	1					M	Feng 2015	Simvastatin	10	mg/kg	10 mg/kg	Statin (Simvastatin)	Statin	2.5	8	4.5	35.63	40.39	0.882149	8.76	9.99	0.876877	25530	36560	0.698304	0.0192083	0.0045196	10	0.0248578	0.0033897	10
2891	Um 2013	Curcumin Attenuates Diet-Induced Hepatic Steatosis byActivating AMP-Activated Protein Kinase	High Fat Diet / HFD	High Fat Diet / HFD	C57BL/6J	C57BL/6J	1	1	0	0	2					M	Um 2013	Curcumin			0.0015	Curcumin	Curcumin	1.25	11	4	35.66	39.1	0.91202	9.91	11.32	0.875442	282	463.44	0.608493	0.0508	0.00715	10	0.0667	0.0214	10
2849	Falach-Malik 2016	N-Acetyl-L-Cysteine inhibits the development of glucose intolerance and hepatic steatosis in diabetes-prone mice	KK-Ay	KK-Ay	KK-Ay	KK-Ay	1	0	1	0	2					M	Falach-Malik 2016_5	N-acetylcysteine	1200	mg/kg	1200 mg/kg/day	N-acetylcysteine	N-acetylcysteine	1.5	9	3.75	35.8	36.8	0.972826	6.3825	5.55	1.15	49.5	72	0.6875	0.115	0.024	9	0.128	0.018	9
4702	Rodriguez-Echevarria 2018	Diet switch and omega-3 hydroxy-fatty acids display differential hepatoprotective effects in an obesity/nonalcoholic fatty liver disease model in mice	High Fat + High Fructose Diet	High Fat + High Fructose Diet	C57BL/6NHsd	C57BL/6?	1	1	0	0	2		23	19	45	M	Rodriguez-Echevarria 2018_1	Docosahexaenoic acid			100ul	Docosahexaenoic acid	Docosahexaenoic acid	5.5	2	6	36	35	1.02857	6.3825	8.88	0.71875	622.5	420	1.48214							1.5	0.547723	6	1.66667	0.516398	3	0.333333	0.516398
3049	Witek 2009	Pan-Caspase Inhibitor VX-166 Reduces Fibrosis in an Animal Model of Nonalcoholic Steatohepatitis	Leptin Receptor Deficiency (db/db)	Leptin Receptor Deficiency (db/db)	C57BL/6J	C57BL/6J	1	0	0	0	1					M	Witek 2009_2	VX-166 (Pan-caspase inhibitor)	6	mg/kg	6mg/kg	Pan-caspase inhibitor (VX-166)	Caspase inhibitor	2.5	8	4.5	36	41	0.878049							0.00282475	0.000407894	13	0.0022598	0.000195473	3							0.4	1.8
4706	Patel 2018	Coagonist of glucagon-like peptide-1 and glucagon receptors ameliorates nonalcoholic fatty liver disease	HFD + CCl4	HFD + CCl4	C57BL/6J	C57BL/6J	1	1	0	0	2				60	M	Patel 2018_2	Exenatide	0.1	mg/kg	100ug/kg	GLP-1 agonist (Exenatide)	GLP-1 agonist	7	6	8.5	36	43	0.837209	8	11	0.727273				0.0169485	0.00429362	6	0.0237279	0.0045196	6	0.9	0.35	6	1.8	0.5	6
6	Bertrand 2013	Effects of dietary eicosapentaenoic acid (EPA) supplementation in high-fat fed mice on lipid metabolism and apelin/APJ system in skeletal muscle.	High Fat Diet / HFD	High Fat Diet / HFD	C57BL/6J	C57BL/6J	1	0	0	0	1				45	M	Bertrand 2013	Eicosapentaenoic acid	36000	mg/kg	36000 mg/kg	Eicosapentaenoic acid	Eicosapentaenoic acid	2.25	10	4.75	36	43	0.837209	6.11	8.33	0.733493	75	187.5	0.4	0.192083	0.0845561	14	0.429362	0.169112	14
100	Choi 2016	Gemigliptin Ameliorates Western-Diet-Induced Metabolic Syndrome in Mice.	Western diet	Western diet	C57BL/6J	C57BL/6J	1	0	0	0	1	0.21		30	41		Choi 2016	Gemigliptin	300	mg/kg	300 mg/kg	Gemigliptin	DPP4 inhibitor	5	4	6	36	42	0.857143	6.66	8.33	0.79952	750	1080	0.694444	0.08	0.02449	6	0.205	0.049	6
195	Sim 2014	LXR-a antagonist meso-dihydroguaiaretic acid attenuates high-fat diet-induced nonalcoholic fatty liver	High Fat Diet / HFD	High Fat Diet / HFD	C57BL/6?	C57BL/6?	1	0	0	0	1				60	M	Sim 2014_1	MDGA	5.5	mg/kg	1, 10 mg/kg	LXR inhibitor (MDGA)	LXR inhibition	1.75	2	2.25	36	39	0.923077							0.11751	0.022598	16	0.0508455	0.0169485	8
238	Vigueira 2017	The beneficial metabolic effects of insulin sensitizers are not attenuated by mitochondrial pyruvate carrier 2 hypomorphism	High Fat Diet / HFD	High Fat Diet / HFD	C57BL/6?	C57BL/6?	1	1	0	0	2				60	M	Vigueira 2017_1	MSDC-0602			331ppm	MSDC-0602	Thiazolidinediones	4	4	5	36	45	0.8	8.05	12.49	0.644516	112.5	603.6	0.186382	0.0180784	0.0101691	5	0.0638394	0.0209031	3
1459	Nishikawa 2015	Resveratrol increases CD68+Kupffer cells colocalizedwith adipose differentiation-related protein andameliorates high-fat-diet-induced fatty liver in mice	High Fat Diet / HFD	High Fat Diet / HFD	C57BL/6J	C57BL/6J	1	1	0	0	2				50	M	Nishikawa 2015	Resveratrol			0.002	Polyphenol (Resveratrol)	Polyphenol (Resveratrol)	1.6	8	3.6	36	38	0.947368							0.305073	0.022598	8	0.61	0.192083	8
2584	Ford 2015	Metformin and salicylate synergistically activate liver AMPK, inhibit lipogenesis and improve insulin sensitivity	High Fat Diet / HFD	High Fat Diet / HFD	C57BL/6?	C57BL/6?	1	1	0	0	2				60	M	Ford 2015	Metformin	2500	mg/kg	2500 mg/kg	Metformin	Biguanide	3	5	4.25	36	37	0.972973	10.2	12.4	0.822581	280	350	0.8	0.045196	0.0607434	10	0.0497156	0.0607434	10
4685	Tolbol 2018	Metabolic and hepatic effects of liraglutide, obeticholic acid and elafibranor in diet-induced obese mouse models of biopsy-confirmed nonalcoholic steatohepatitis	High fat, fructose, cholesterol	High fat, fructose, cholesterol	C57BL/6J	C57BL/6J	0	1	0	0	1	2	20		40	M	Tolbol 2018_1	Liraglutide	0.4	mg/kg	0.4 mg/kg	GLP-1 agonist (Liraglutide)	GLP-1 agonist	9	8	11	36	39	0.923077
979	Mookkan 2013	Combination of vildagliptin and rosiglitazone ameliorates nonalcoholic fatty liver disease in C57BL/6 mice	High Fat + High Fructose Diet	High Fat + High Fructose Diet	C57BL/6?	C57BL/6?	1	1	0	0	2		40		60	M	Mookkan 2013_1	Rosiglitazone	10	mg/kg	10 m/gkg	Thiazolidinediones (Rosiglitazone)	Thiazolidinediones	2.5	4	3.5	36.02	36.51	0.986579	13.2	17.49	0.754717				0.0282475	0.0069	9	0.0406764	0.01	3
979	Mookkan 2013	Combination of vildagliptin and rosiglitazone ameliorates nonalcoholic fatty liver disease in C57BL/6 mice	High Fat + High Fructose Diet	High Fat + High Fructose Diet	C57BL/6?	C57BL/6?	1	1	0	0	2		40		60	M	Mookkan 2013_5	Metformin	350	mg/kg	350 mg/kg	Metformin	Biguanide	2.5	4	3.5	36.04	36.51	0.987127	14.34	17.49	0.819897				0.0293774	0.017	8	0.0406764	0.01	4
1476	Salamone 2011	Silibinin Improves Hepatic and Myocardial Injury in Mice with Nonalcoholic Steatohepatitis	Leptin Receptor Deficiency (db/db) + MCD	Leptin Receptor Deficiency (db/db) + MCD	BKS.Cg-m+/+ Leprdb/J	Mixed	1	0	0	0	1					M	Salamone 2011	Silibinin	20	mg/kg	20 mg/kg	Silibinin	Silymarin	3	4	4	36.4	34.8	1.04598	5.75535	10.0899	0.570407	39	49.8	0.783133	0.00937817	0.00664243	6	0.0153666	0.00359798	6
1477	Salamone 2012	Silibinin Modulates Lipid Homeostasis and Inhibits Nuclear Factor Kappa B Activation in Experimental Nonalcoholic Steatohepatitis	Leptin Receptor Deficiency (db/db) + MCD	Leptin Receptor Deficiency (db/db) + MCD	BKS.Cg-m+/+ Leprdb/J	Mixed	1	0	0	0	1					M	Salamone 2012	Silibinin	20	mg/kg	20 mg/kg	Silibinin	Silymarin	3	4	4	36.5	39	0.935897
4875	Kalavalapalli 2018	Pioglitazone improves hepatic mitochondrial function in a mouse model of nonalcoholic steatohepatitis	High fat, fructose, cholesterol (trans-fat)	High fat, fructose, cholesterol	C57BL/6J	C57BL/6J	1	1	0	0	2	2	22		40	M	Kalavalapalli 2018	Pioglitazone	10	mg/kg	10mg/kg	Thiazolidinediones (Pioglitazone)	Thiazolidinediones	2.75	20	7.75	36.5	38.9	0.938303	4.884	6.0495	0.807339	24	25.5	0.941176	0.310723	0.0664381	6	0.375127	0.0525404	6
4037	Harano 2006	Fenofibrate, a peroxisome proliferator-activated receptor α agonist, reduces hepatic steatosis and lipid peroxidation in fatty liver Shionogi mice with hereditary fatty liver	Fatty liver Shionogi FLS-ob/ob mice	Fatty liver Shionogi FLS-ob/ob mice	FLS	FLS	1	0	0	0	1					M	Harano 2006	Fenofibrate	0.1	%	0.1% w/w	Fibrate (Fenofibrate)	Fibrates	3.25	1.71429	3.67857	36.6	38.5	0.950649							0.0339	0.0079093	8	0.215	0.056495	8
3049	Witek 2009	Pan-Caspase Inhibitor VX-166 Reduces Fibrosis in an Animal Model of Nonalcoholic Steatohepatitis	Leptin Receptor Deficiency (db/db) + MCD	Leptin Receptor Deficiency (db/db) + MCD	C57BL/6J	C57BL/6J	1	0	0	0	1					M	Witek 2009_3	VX-166 (Pan-caspase inhibitor)	6	mg/kg	6mg/kg	Pan-caspase inhibitor (VX-166)	Caspase inhibitor	2.5	4	3.5	37	38	0.973684							0.022598	0.0234838	12	0.0474558	0.0176829	5	3	0.1	12	2.8	0.89	5	2	0.1
4685	Tolbol 2018	Metabolic and hepatic effects of liraglutide, obeticholic acid and elafibranor in diet-induced obese mouse models of biopsy-confirmed nonalcoholic steatohepatitis	High fat, fructose, cholesterol	High fat, fructose, cholesterol	C57BL/6J	C57BL/6J	0	1	0	0	1	2	20		40	M	Tolbol 2018_3	Obetacholic acid	120	mg/kg	120 mg/kg	FXR agonist (Obetacholic acid)	FXR agonist	9	8	11	37	39	0.948718
979	Mookkan 2013	Combination of vildagliptin and rosiglitazone ameliorates nonalcoholic fatty liver disease in C57BL/6 mice	High Fat + High Fructose Diet	High Fat + High Fructose Diet	C57BL/6?	C57BL/6?	1	1	0	0	2		40		60	M	Mookkan 2013_4	Vidagliptin	10	mg/kg	10 mg/kg	Vidagliptin	DPP4 inhibitor	2.5	4	3.5	37.43	36.51	1.0252	14.95	17.49	0.854774				0.0305073	0.015	7	0.0406764	0.01	3
4702	Rodriguez-Echevarria 2018	Diet switch and omega-3 hydroxy-fatty acids display differential hepatoprotective effects in an obesity/nonalcoholic fatty liver disease model in mice	High Fat + High Fructose Diet	High Fat + High Fructose Diet	C57BL/6NHsd	C57BL/6?	1	1	0	0	2		23	19	45	M	Rodriguez-Echevarria 2018_2	Eicosapentaenoic acid			100ul	Eicosapentaenoic acid	Eicosapentaenoic acid	5.5	2	6	37.5	35	1.07143	10.656	8.88	1.2	450	420	1.07143							1.66667	0.516398	6	1.66667	0.516398	3	0.833333	0.408248
3135	Liu 2017b	PEGylated Curcumin Derivative Attenuates Hepatic Steatosis via CREB/PPAR-𝛾/CD36 Pathway	High Fat Diet / HFD	High Fat Diet / HFD	C57BL/6J	C57BL/6J	1	1	0	0	2				60	M	Liu 2017b_1	PEGylated curcumin derivative Curc-mPEG454	37.5	mg/kg	50, 100 mg/kg IP every other day	Curcumin	Curcumin	1.75	16	5.75	37.64	44.08	0.853902							0.358743	0.0621445	20	0.717486	0.0169485	10	0.585106	0.489362	20	2	0.1	10
2941	Murase 2011	Coffee polyphenols suppress diet-induced body fat accumulation by downregulating SREBP-1c and related molecules in C57BL/6J mice	High Fat Diet / HFD	High Fat Diet / HFD	C57BL/6J	C57BL/6J	1	0	0	0	1				54	M	Murase 2011_1	Coffee polyphenols	0.75	%	0.5, 1%	Coffee	Coffee	1.75	15	5.5	37.95	42.8	0.886682	14.677	16.4558	0.891906	294.75	516	0.571221	0.0576249	0.0267956	20	0.0881322	0.0535912	10
3307	Lee 2015a	ACE Reduces Metabolic Abnormalities in a High-Fat Diet Mouse Model	High Fat Diet / HFD	High Fat Diet / HFD	C57BL/6N	C57BL/6N	1	1	0	0	2				60	M	Lee 2015a	Curcumin	50	mg/kg	50 mg/kg	Curcumin	Curcumin	1.6	10	4.1	38	40.7	0.933661	14.1858	15.6122	0.908638				0.0916349	0.0394335	10	0.138978	0.0255357	10
3933	Pathak 2017	Farnesoid X receptor induces Takeda G-protein receptor 5 cross-talk to regulate bile acid synthesis and hepatic metabolism	High Fat Diet / HFD	High Fat Diet / HFD	C57BL/6J	C57BL/6J	1	0	0	0	1				60	M	Pathak 2017	INT-767	30	mg/kg	30 mg/kg	FXR/TGR5 agonist (INT-767)	FXR agonist	5	1.28571	5.32143	38	39.5	0.962025	10.545	12.21	0.863636				3.50269e-05	1.01691e-05	9	4.97156e-05	5.08455e-06	9
4162	Yang 2014b	Resveratrol ameliorates hepatic metaflammation and inhibits NLRP3 inflammasome activation	High Fat Diet / HFD	High Fat Diet / HFD	C57BL/6J	C57BL/6J	1	0	0	0	1				45	M	Yang 2014b	Resveratrol				Polyphenol (Resveratrol)	Polyphenol (Resveratrol)	3.25	4	4.25	38.2	38.5	0.992208	8.0919	16.5501	0.488934	51.5	98.2	0.52444	0.052	0.004	10	0.07	0.007	10
365	Sohn 2015	Lactobacillus paracaseiInduces M2-Dominant Kupffer CellPolarization in a Mouse Model of Nonalcoholic Steatohepatitis	High Fat + High Fructose Diet	High Fat + High Fructose Diet	C57BL/6?	C57BL/6?	1	1	0	0	2		10		40	M	Sohn 2015	Lactobacillus paracasei			1x10^8 cells	Lactobacillus paracasei	Lactobacillus sp.	2	10	4.5	38.5	42	0.916667													1.6	0.63	10	2	0.95	10
1612	Pizarro 2015	BENEFICIAL EFFECTS OF MINERALOCORTICOID RECEPTOR BLOCKADE IN EXPERIMENTAL NON-ALCOHOLIC STEATOHEPATITIS	Choline-deficient L-amino-defined diet / CDAA	Choline-deficient L-amino-defined diet / CDAA	C57BL/6J	C57BL/6J	1	0	1	0	2					M	Pizarro 2015	Eplerenone	1	mg/g	1 mg/g of diet	Eplerenone	Angiotensin Receptor Blocker	2.3	22	7.8	38.8	35.8	1.0838							0.0992052	0.0152536	8	0.112764	0.0240669	8	2.2	0.583095	9	3	0.1	9
1912	Kodama 2015	Anti-CD44 Antibody Treatment Lowers Hyperglycemia and Improves Insulin Resistance, Adipose Inflammation, and Hepatic Steatosis in Diet-Induced Obese Mice	High Fat Diet / HFD	High Fat Diet / HFD	C57BL/6J	C57BL/6J	1	1	1	0	3				60	M	Kodama 2015 _1	Pioglitazone	0.02	%	0.0002	Thiazolidinediones (Pioglitazone)	Thiazolidinediones	5	4	6	38.9	42.5	0.915294	5.2725	8.436	0.625				0.067794	0.0193778	6	0.0881322	0.0166095	3
5380	Pan 2018	Attenuation by Tetrahydrocurcumin of Adiposity and Hepatic Steatosis in Mice with High-Fat-Diet-Induced Obesity	High Fat Diet / HFD	High Fat Diet / HFD	C57BL/6J	C57BL/6J	1	1	0	0	2				40	M	Pan 2018_1	Tetrahydrocurcumin	60	mg/kg	20, 100mg/kg	Curcumin	Curcumin	3.5	10	6	38.95	43	0.905814	6.9	7.9	0.873418	61.5	270	0.227778	0.00468909	0.000441791	10	0.00689239	0.0022711	5
3636	Tam 2014	Role of adiponectin in the metabolic effects of cannabinoid type 1 receptor blockade in mice with diet-induced obesity	Adipo-/- + HFD + sucrose	Adipo-/- + HFD + sucrose	C57BL/6J	C57BL/6J	1	1	1	0	3			10	60	M	Tam 2014_1	Rimonabant	10	mg/kg	10 mg/kg	Rimonabant	CB1 antagonist (Rimonabant)	8.25	1	8.5	39	57	0.684211	4.1625	8.88	0.46875	150	1200	0.125	0.0293774	0.0145	5	0.0327671	0.0145	5
4764	Guo 2018	Metformin-Induced Changes of the Coding Transcriptome and Non-Coding RNAs in the Livers of Non-Alcoholic Fatty Liver Disease Mice	High Fat Diet / HFD	High Fat Diet / HFD	C57BL/6J	C57BL/6J	1	0	1	0	2				45	M	Guo 2018	Metformin	3	mg/kg	3mg/kg	Metformin	Biguanide	3.75	5	5	39	44.5	0.876404							0.0632744	0.0067794	5	0.0870023	0.0090392	5
4746	Zhu 2018	Silybum marianum oil attenuates hepatic steatosis and oxidative stress in high fat diet-fed mice	High Fat + High Cholesterol Diet	High Fat + High Cholesterol Diet	ICR	ICR	1	1	0	0	2	1.5			22	M	Zhu 2018_1	Silybum marianum oil	7.5	ml/kg	5ml/kg	Silybum marianum oil	Silymarin	2	8	4	39.43	43.24	0.911887	5	7.5	0.666667	105	147	0.714286	0.05069	0.010315	20	0.09513	0.01791	10
848	Honda 2016	The Selective SGLT2 Inhibitor Ipragliflozin Has a Therapeutic Effect on Nonalcoholic Steatohepatitis in Mice	High fat, fructose, cholesterol	High fat, fructose, cholesterol	C57BL/6J	C57BL/6J	1	1	1	0	3	2	22		40	M	Honda 2016	Ipragliflozin	40	mg/kg	40 mg/kg	Ipragliflozin	SGLT2 inhibitor	2	10	4.5	39.6	39.7	0.997481	7.9	11.29	0.699734	72	19.5	3.69231	0.093	0.018	7	0.123	0.021	7
199	Cong 2008	The Establishment of a Novel Non-Alcoholic Steatohepatitis Model Accompanied with Obesity and Insulin Resistance in Mice.	High Fat Diet / HFD	High Fat Diet / HFD	C57BL/6?	C57BL/6?	1	1	1	0	3				60	M	Cong 2008_2	Fenofibrate	150	mg/kg	150 mg/kg body weight	Fibrate (Fenofibrate)	Fibrates	6.2	8	8.2	40	50	0.8	5	8.33	0.60024	179.4	421.2	0.425926	0.0033897	0.00285845	10	0.0119769	0.00357306	5
2639	Depner 2012	Menhaden Oil Decreases High-Fat Diet–Induced Markers of Hepatic Damage, Steatosis, Inflammation, and Fibrosis in Obese Ldlr -/- Mice	LDL-receptor knockout (LDL-/-) + High Fat High Cholesterol Diet	LDL-receptor knockout (LDL-/-) + High Fat High Cholesterol Diet	C57BL/6J	C57BL/6J	1	0	0	0	1	0.5			54	M	Depner 2012_2	PUFA (menhaden oil)			2% total calories	PUFA (menhaden oil)	Omega-3 polyunsaturated fatty acids (mix)	2	12	5	40	40	1	11	11.9	0.92437				0.0723136	0.0293774	8	0.145757	0.0146887	8
4029	Muraoka 2011	Ezetimibe decreases SREBP-1c expression in liver and reverses hepatic insulin resistnace in mice fed a high-fat diet	High Fat Diet / HFD	High Fat Diet / HFD	C57BL/6J	C57BL/6J	1	0	0	0	1				57	M	Muraoka 2011	Ezetimibe	0.005	%	0.005% wt/wt	Ezetimibe	Cholesterol Absorption Inhibitor	1.75	2	2.25	40	41	0.97561	5.9385	5.9385	1	315	435	0.724138	0.339	0.0714549	10	0.452	0.0714549	10
5209	Zheng 2018	Dipeptidyl-Peptidase 4 Inhibitor Sitagliptin Ameliorates Hepatic Insulin Resistance by Modulating Inflammation and Autophagy in ob/ob Mice	Leptin deficiency (ob/ob)	Leptin deficiency (ob/ob)	B6.V-Lepob/J	B6.V-Lepob	0	1	0	0	1					M	Zheng 2018	Sitagliptin	40	mg/kg	50 mg/kg	DPP4 inhibitor (Sitagliptin)	DPP4 inhibitor	1.5	4	2.5	40	44	0.909091	9.03	11.55	0.781818	5.59	13.14	0.425419	0.0090505	0.00240669	6	0.0154796	0.00836126	6
1478	Gu 2016	Silymarin Ameliorates Metabolic Dysfunction Associated with Diet-Induced Obesity Via Activation of Farnesyl X Receptor	High Fat Diet / HFD	High Fat Diet / HFD	C57BL/6?	C57BL/6?	1	1	0	0	2				60	F	Gu 2016	Silymarin	400	mg/kg	400 mg/kg	Silymarin	Silymarin	4.5	6	6	40.5	39.5	1.02532	6.5	7.8	0.833333				0.0073	0.00269049	7	0.0086	0.000747359	7
895	Lee 2012a	Exendin-4 Improves Steatohepatitis by Increasing Sirt1 Expression in High-Fat Diet-Induced Obese C57BL/6J Mice	HFD + STZ	HFD + STZ	C57BL/6J	C57BL/6J	1	1	0	0	2				45	M	Lee 2012a	Extendin 4	0.0042	mg/kg	1 nmol/kg	GLP-1 agonist (Exenatide)	GLP-1 agonist	1.5	10	4	41	45	0.911111							0.259877	0.0357274	10	0.361568	0.0357274	10	1.4	0.63	10	2.25	0.63	10	1.2	0.63
490	Bae 2016	Amelioration of non-alcoholic fatty liver disease with NPC1L1-targeted IgY or n-3 polyunsaturatedfatty acids in mice	High Fat Diet / HFD	High Fat Diet / HFD	C57BL/6?	C57BL/6?	1	0	0	0	1				40		Bae 2016	Ezetemibe, (N-IgY)	1.8	mg/kg	1.8 mg/kg body weight	Ezetimibe	Cholesterol Absorption Inhibitor	1.4	22	6.9	41	42	0.97619							0.07	0.003	9	0.067	0.007	9	2.1	0.6	9	2.3	0.3	9
1916	Kawaguchi 2014	Exendin‐4, a glucagon‐like peptide‐1 receptor agonist, modulates hepatic fatty acid composition and Δ‐5‐desaturase index in a murine model of non‐alcoholic steatohepatitis	Leptin Receptor Deficiency (db/db) + MCD	Leptin Receptor Deficiency (db/db) + MCD	BKS.Cg-m+/+ Leprdb/J	Mixed	1	0	0	0	1					M	Kawaguchi 2014	Exendin-4	0.02	mg/kg	0.020 mg/kg/day	GLP-1 agonist (Exenatide)	GLP-1 agonist	1.5	8	3.5	41	51	0.803922
3485	Yimam 2016	Appetite Suppression and Antiobesity Effect of a Botanical Composition Composed of Morus alba, Yerba mate, and Magnolia officinalis	High Fat Diet / HFD	High Fat Diet / HFD	C57BL/6J	C57BL/6J	1	1	0	0	2				60	M	Yimam 2016	Orlistat	40	mg/kg	40 mg/kg	Orlistat	Lipase inhibitor	3	7	4.75	41.5	46.5	0.892473	13.6419	15.096	0.903676	555	585	0.948718							1.47	0.256	10	2.68	0.158	10	1.67	0.238
1519	Barreyro 2015	The Pan-Caspase Inhibitor Emricasan (Idn-6556) Decreases Liver Injury and Fibrosis in a Murine Model of Non-Alcoholic Steatohepatitis	High Fat + High Sucrose	High Fat + High Sucrose	C57BL/6J	C57BL/6J	1	0	1	0	2				47	M	Barreyro 2015	Emricasan	0.3	mg/kg	0.3 mg/kg/day	Emricasan	Caspase inhibitor		20		42	43	0.976744	15.5955	16.761	0.930464	210	222	0.945946	0.1	0.012	15	0.108	0.012	15	2.4	0.39	15	2.7	0.39	15
2535	Zhang 2016	Berberine prevents progression from hepatic steatosis to steatohepatitis and fibrosis by reducing endoplasmic reticulum stress	Leptin Receptor Deficiency (db/db)	Leptin Receptor Deficiency (db/db)	C57BLKS/J	C57BLKS/J	1	0	0	0	1					M	Zhang 2016_1	Berberine	200	mg/kg	200 mg/kg/day	Berberine	Berberine	2.25	5	3.5	42	46.5	0.903226	10.3	27.5	0.374545				0.0835143	0.0389926	7	0.164572	0.0259951	7
3610	Kim 2014	All-trans-Retinoic Acid Ameliorates Hepatic Steatosis in Mice by a Novel Transcriptional Cascade	Western diet	Western diet	C57BL/6?	C57BL/6?	1	0	0	0	1			11	42	M	Kim 2014	All Trans Retinoic Acid	15	mg/kg	15 mg/kg/day	All Trans Retinoic Acid	All Trans Retinoic Acid	3	1	3.25	42	44.8	0.9375	6.105	10.8225	0.564103				0.0497156	0.0090392	4	0.0723136	0.0180784	4
3636	Tam 2014	Role of adiponectin in the metabolic effects of cannabinoid type 1 receptor blockade in mice with diet-induced obesity	High Fat + High Sucrose	High Fat + High Sucrose	C57BL/6J	C57BL/6J	1	1	1	0	3			10	60	M	Tam 2014_2	Rimonabant	10	mg/kg	10 mg/kg	Rimonabant	CB1 antagonist (Rimonabant)	8.25	1	8.5	42	54	0.777778	6.3825	8.325	0.766667	375	1725	0.217391	0.0101691	0.00475	5	0.0271176	0.00475	5
4320	Kessoku 2016	Resveratrol ameliorates fibrosis and inflammation in a mouse model of nonalcoholic steatohepatitis	High Fat Diet / HFD	High Fat Diet / HFD	C57BL/6J	C57BL/6J	1	1	1	0	3				60	M	Kessoku 2016_1	Resveratrol	1.1	%	2, 20 mg/kg diet	Polyphenol (Resveratrol)	Polyphenol (Resveratrol)	4	4	5	42.35	43.5	0.973563							0.232759	0.0169485	10	0.237279	0.022598	5
1912	Kodama 2015	Anti-CD44 Antibody Treatment Lowers Hyperglycemia and Improves Insulin Resistance, Adipose Inflammation, and Hepatic Steatosis in Diet-Induced Obese Mice	High Fat Diet / HFD	High Fat Diet / HFD	C57BL/6J	C57BL/6J	1	1	1	0	3				60	M	Kodama 2015 _2	Metformin			0.005	Metformin	Biguanide	5	4	6	42.6	42.5	1.00235	6.549	8.436	0.776316				0.045196	0.0276713	6	0.0881322	0.0166095	3
225	Van den Hoek 2013	APOE*3Leiden.CETP transgenic mice as model for pharmaceutical treatment of the metabolic syndrome	High Fat + High Fructose Diet	High Fat + High Fructose Diet	C57BL/6J-CBA/J	Mixed	1	0	0	0	1				60	M	Van den Hoek 2013_1	Atorvastatin	10	mg/kg	10 mg/kg	Statin (Atorvastatin)	Statin	6	5	7.25	42.7	43.2	0.988426	10	10.5	0.952381	780	1012.5	0.77037	0.1383	0.0775353	10	0.170615	0.112334	2
4056	Wooten 2016	High-Fructose Intake Impairs the Hepatic Hypolipidemic Effects of a High-Fat Fish-Oil Diet in C57bl_6 Mice	High Fat Diet / HFD	High Fat Diet / HFD	C57BL/6J	C57BL/6J	1	1	0	0	2				60	M	Wooten 2016_1	Omega-3 polyunsaturated fatty acids	22	%	22% PUFA	PUFA (Omega-3 supplement)	Omega-3 polyunsaturated fatty acids (mix)	2	14	5.5	42.8	45	0.951111	13.8583	20.4184	0.678717	298.5	256.5	1.16374	0.0272306	0.0115024	8	0.0360438	0.0343015	8
347	Zhong 2017	Irbesartan ameliorates hyperlipidemia and liver steatosis in type 2 diabetic db/db mice via stimulating PPAR-g, AMPK/Akt/mTOR signaling and autophagy	Leptin Receptor Deficiency (db/db)	Leptin Receptor Deficiency (db/db)	BKS.Cg-m+/+ Leprdb/J	Mixed	1	1	0	0	2				13	Both	Zhong 2017	Irbesartan	50	mg/kg	50 mg/kg/day	Irbesartan	Angiotensin Receptor Blocker	2.5	16	6.5	42.87	53.41	0.802659
4	Park 2013	Potent Anti-Diabetic Effects of MHY908, a Newly Synthesized PPAR a/c Dual Agonist in db/db Mice	Leptin Receptor Deficiency (db/db)	Leptin Receptor Deficiency (db/db)	C57BLKS/J	C57BLKS/J	1	0	0	0	1					M	Park 2013_1	MHY908	2	mg/kg	1, 3 mg/kg/day	MHY908	PPARalpha-delta agonist	2	4	3	43	44	0.977273	23.3655	25.53	0.915217	397.5	855	0.464912	1.52	0.325269	16	1.87	0.367696	8
2639	Depner 2012	Menhaden Oil Decreases High-Fat Diet–Induced Markers of Hepatic Damage, Steatosis, Inflammation, and Fibrosis in Obese Ldlr -/- Mice	High Fat + High Cholesterol Diet	High Fat + High Cholesterol Diet	C57BL/6J	C57BL/6J	1	0	0	0	1	0.5			54	M	Depner 2012_1	PUFA (menhaden oil)			2% total calories	PUFA (menhaden oil)	Omega-3 polyunsaturated fatty acids (mix)	2	12	5	43	45	0.955556	5.6	8.3	0.674699				0.0813528	0.0169485	8	0.159316	0.0711837	8
2682	Nakano 2015	Remogliflozin Etabonate Improves Fatty Liver Disease in Diet-Induced Obese Male Mice	High Fat Diet / HFD	High Fat Diet / HFD	C57BL/6J	C57BL/6J	1	1	0	0	2				57	M	Nakano 2015_1	Bezafibrate	0.2	%	0.2% (wt/wt) of intake	Fibrate (Bezafibrate)	Fibrates	3.75	4	4.75	43	49	0.877551							0.056495	0.00691917	6	0.067794	0.0239155	3
4637	Lin 2017	Metformin improves nonalcoholic fatty liver disease in obese mice via down-regulation of apolipoprotein A5 as part of the AMPK/LXRŒ± signaling pathway	Leptin Deficiency (ob/ob)	Leptin Deficiency (ob/ob)	C57BL/6J	C57BL/6J	1	1	0	0	2					M	Lin 2017_1	Metformin	75	mg/kg	50, 100mg/kg	Metformin	Biguanide	1.5	4	2.5	43.13	57.26	0.753231	12.38	17.14	0.722287	92.13	140.7	0.654797	0.0254228	0.00282475	20	0.0632744	0.0045196	10
1531	Zhang 2012	Tesaglitazar Ameliorates Non-Alcoholic Fatty Liver Disease and Atherosclerosis Development in Diabetic Low-Density Lipoprotein Receptor-Deficient Mice	LDLR -/- + HFD + STZ	LDLR -/- + HFD + STZ	C57BL/6?	C57BL/6?	1	1	0	0	2				40	F	Zhang 2012	Tesaglitazar	0.02	mg/kg	0.02 mg/kg/day	Tesaglitazar	PPAR agonist (other)	2.75	6	4.25	43.5	41.2	1.05583	8.4693	16.6777	0.50782				0.0239539	0.0199273	6	0.0396595	0.0261822	6
5374	Valdecantos 2018	Differential Effects of a Glucagon-Like Peptide 1 Receptor Agonist in Non-Alcoholic Fatty Liver Disease and in Response to Hepatectomy	High Fat Diet / HFD	High Fat Diet / HFD	C57BL/6?	C57BL/6?	1	1	1	0	3				60	M	Valdecantos 2018_1	GLP-1R agonist			10 nmol/kg every 2 days	GLP-1R agonist	GLP-1 agonist	4.5	3	5.25	43.5	47.5	0.915789
3049	Witek 2009	Pan-Caspase Inhibitor VX-166 Reduces Fibrosis in an Animal Model of Nonalcoholic Steatohepatitis	Leptin Receptor Deficiency (db/db)	Leptin Receptor Deficiency (db/db)	C57BL/6J	C57BL/6J	1	0	0	0	1					M	Witek 2009_1	VX-166 (Pan-caspase inhibitor)	6	mg/kg	6mg/kg	Pan-caspase inhibitor (VX-166)	Caspase inhibitor	2.5	4	3.5	44	45	0.977778							0.0045196	0.00195473	12	0.0033897	0.00202252	5							0.6	1.73
3558	Verbeek 2017	Dietary intervention, but not losartan,completely reverses non-alcoholicsteatohepatitis in obese and insulin-resistant mice	High Fat + High Sucrose	High Fat + High Sucrose	C57BL/6?	C57BL/6?	1	0	1	0	2			37	45	M	Verbeek 2017	Losartan	30	mg/kg	30 mg/kg/day	ARB (Losartan)	Angiotensin Receptor Blocker		8		44	45	0.977778	12.21	12.765	0.956522	414.205	567.88	0.729387							2.6	0.6	9	2.9	0.3	9
225	Van den Hoek 2013	APOE*3Leiden.CETP transgenic mice as model for pharmaceutical treatment of the metabolic syndrome	High Fat + High Fructose Diet	High Fat + High Fructose Diet	C57BL/6J-CBA/J	Mixed	1	0	0	0	1				60	M	Van den Hoek 2013_4	Rosiglitazone	11	mg/kg	11 mg/kg	Thiazolidinediones (Rosiglitazone)	Thiazolidinediones	6	5	7.25	44	43.2	1.01852	8.1	10.5	0.771429	187.5	1012.5	0.185185	0.0832736	0.0248509	10	0.170615	0.112334	3
4669	Jadhav 2018	Reversal of metabolic disorders by pharmacological activation of bile acid receptors TGR5 and FXR	High Fat Diet / HFD	High Fat Diet / HFD	C57BL/6J	C57BL/6J	1	0	0	0	1				60	M	Jadhav 2018_1	INT-767	30	mg/kg	30 mg/kg	FXR/TGR5 agonist (INT-767)	FXR agonist		12		44	49	0.897959	10.545	10.545	1				0.0350269	0.00597717	7	0.0587548	0.0149373	7
4971	Ding 2018	Progression and Regression of Hepatic Lesions in a Mouse Model of NASH Induced by Dietary Intervention and Its Implications in Pharmacotherapy	Western diet	Western diet	C57BL/6?	C57BL/6?	1	0	0	0	1	2	22		40	M	Ding 2018_1	Cenicriviroc	30	mg/kg	10, 50mg/kg	Cenicriviroc	CCR2/CCR5 antagonist	9.25	11	12	44.25	41	1.07927	7.36041	7.52025	0.978745																2.31958	0.532497
4056	Wooten 2016	High-Fructose Intake Impairs the Hepatic Hypolipidemic Effects of a High-Fat Fish-Oil Diet in C57bl_6 Mice	High Fat + High Fructose Diet	High Fat + High Fructose Diet	C57BL/6J	C57BL/6J	1	1	0	0	2		20		60	M	Wooten 2016_2	Omega-3 polyunsaturated fatty acids	22	%	22% PUFA	PUFA (Omega-3 supplement)	Omega-3 polyunsaturated fatty acids (mix)	2	14	5.5	44.5	44	1.01136	15.6066	13.4254	1.16246	369	321	1.14953	0.0442921	0.0332367	8	0.0784151	0.018214	8
225	Van den Hoek 2013	APOE*3Leiden.CETP transgenic mice as model for pharmaceutical treatment of the metabolic syndrome	High Fat + High Fructose Diet	High Fat + High Fructose Diet	C57BL/6J-CBA/J	Mixed	1	0	0	0	1				60	M	Van den Hoek 2013_2	Fenofibrate	12	mg/kg	12 mg/kg	Fibrate (Fenofibrate)	Fibrates	6	5	7.25	44.7	43.2	1.03472	10.5	10.5	1	787.5	1012.5	0.777778	0.209144	0.0711038	8	0.170615	0.112334	2
2201	Ni 2016	Silymarin attenuated hepatic steatosis through regulation of lipid metabolism and oxidative stress in a mouse model of nonalcoholic fatty liver disease (NAFLD)	High Fat Diet / HFD	High Fat Diet / HFD	C57BL/6J	C57BL/6J	1	0	1	0	2				60	M	Ni 2016_1	Obetacholic acid	30	mg/kg	30 mg/kg	FXR agonist (Obetacholic acid)	FXR agonist	6.2	4	7.2	45	47	0.957447							0.015	0.01581	10	0.09	0.03162	5	1.2	0.32	10	2.4	0.63246	5
2201	Ni 2016	Silymarin attenuated hepatic steatosis through regulation of lipid metabolism and oxidative stress in a mouse model of nonalcoholic fatty liver disease (NAFLD)	High Fat Diet / HFD	High Fat Diet / HFD	C57BL/6J	C57BL/6J	1	0	1	0	2				60	M	Ni 2016_2	Silymarin	30	mg/kg	30 mg/kg	Silymarin	Silymarin	6.2	4	7.2	45	47	0.957447							0.02	0.01581	10	0.09	0.03162	5	1.4	0.63246	10	2.4	0.63246	5
272	Wang 2017	Lipid-lowering and anti-oxidation effects of chondroitin sulfate prepared from squid cartilage in hypercholesterolemia mice	High Fat + High Cholesterol Diet	High Fat + High Cholesterol Diet	Kunming	Kunming	1	1	0	0	2	4			12		Wang 2017	Simvastatin	8	mg/kg	8 mg/kg/day	Statin (Simvastatin)	Statin	3.7	5	4.95	45	44.5	1.01124							0.0042	0.001732	12	0.0085	0.005196	12
2175	Yamamoto 2008	Olmesartan Prevents Cardiovascular Injury and Hepatic Steatosis in Obesity and Diabetes, Accompanied by Apoptosis Signal Regulating Kinase-1 Inhibition	High Fat + High Sucrose	High Fat + High Sucrose	C57BL/6J	C57BL/6J	1	1	0	0	2			24	60	M	Yamamoto 2008	Olmesartan	5	mg/kg	5 mg/kg/day	ARB (Olmesartan)	Angiotensin Receptor Blocker	2.5	17	6.75	45	46	0.978261							0.00814	0.001107	7	0.0113	0.003321	7
3545	Depner 2013	Docosahexaenoic Acid Attenuates Hepatic Inflammation, Oxidative Stress, and Fibrosis without Decreasing Hepatosteatosis in a Ldlr -/- Mouse Model of Western Diet-Induced Nonalcoholic Steatohepatitis	LDL-receptor knockout (LDL-/-) + Western diet	LDL-receptor knockout (LDL-/-) + Western diet	C57BL/6J	C57BL/6J	1	0	0	0	1	0.2			41	M	Depner 2013_2	Docosahexaenoic acid			Not Stated	Docosahexaenoic acid	Docosahexaenoic acid	2	16	6	45	42	1.07143	9	11	0.818182				0.437271	0.242884	8	0.3706	0.329172	4
2037	Briskey 2016	Probiotics modify tight-junction proteins in an animal model of nonalcoholic fatty liver disease	High Fat Diet / HFD	High Fat Diet / HFD	C57BL/6J	C57BL/6J	1	1	1	0	3				45	M	Briskey 2016	Probiotics			10^8-9 cfu/ml	Probiotics	Probiotic (mix)	2	10	4.5	45.5	46.5	0.978495	20.5	20	1.025				0.00272	0.001465	10	0.004395	0.002092	9	2	1.3	10	2.4	0.7	9	1.7	1.1
4971	Ding 2018	Progression and Regression of Hepatic Lesions in a Mouse Model of NASH Induced by Dietary Intervention and Its Implications in Pharmacotherapy	Western diet	Western diet	C57BL/6?	C57BL/6?	1	0	0	0	1	2	22		40	M	Ding 2018_2	Obetacholic acid	30	mg/kg	20, 40mg/kg	FXR agonist (Obetacholic acid)	FXR agonist	9.25	11	12	45.75	41	1.11585	7.38594	7.52025	0.98214	52.1303	51.7815	1.00674	0.553764	0.226212	60	0.648156	0.218681	58							1.8	0.507822
4483	Jouihan 2017	Superior reductions in hepatic steatosis and fibrosis with co-administration of a glucagon-like peptide-1 receptor agonist and obeticholic acid in mice	Leptin Deficiency (ob/ob) + AMLN diet	Leptin Deficiency (ob/ob) + AMLN diet	C57BL/6J	C57BL/6J	1	1	1	0	3	4	22		40	M	Jouihan 2017_2	IP118	1	mg/kg	1 mg/kg	IP118	GLP1R agonist	5	3	5.75	46	52	0.884615	6.66	12.21	0.545455	930	825	1.12727							2.3	0.483	10	3	0.1	5
3748	Milton-Laskibar 2017	Lack of Additive Effects of Resveratrol and Energy Restriction in the Treatment of Hepatic Steatosis in Rats	High Fat + High Sucrose	High Fat + High Sucrose	Wistar	Wistar	1	0	0	0	1			18	45	M	Milton-Laskibar 2017	Resveratrol	30	mg/kg	30 mg/kg	Polyphenol (Resveratrol)	Polyphenol (Resveratrol)	1.75	6	3.25	46	40	1.15							0.0366088	0.0118639	9	0.0481337	0.0159316	9
2682	Nakano 2015	Remogliflozin Etabonate Improves Fatty Liver Disease in Diet-Induced Obese Male Mice	High Fat Diet / HFD	High Fat Diet / HFD	C57BL/6J	C57BL/6J	1	1	0	0	2				57	M	Nakano 2015_2	Remogliflozin			0.01, .03% (wt/wt) of intake	Remogliflozin	SGLT2 inhibitor	3.75	4	4.75	46.25	49	0.943878							0.0485857	0.00672618	14	0.067794	0.0239155	4
2800	Jia 2015	Effect of Chronic Pioglitazone Treatment on Hepatic Gene Expression Profile in Obese C57BL/6J Mice	High Fat Diet / HFD	High Fat Diet / HFD	C57BL/6J	C57BL/6J	1	1	0	0	2				60	M	Jia 2015	Pioglitazone	25	mg/kg	25 mg/kg/day	Thiazolidinediones (Pioglitazone)	Thiazolidinediones	5.5	5.43	6.8575	47	40	1.175	5.55	8.0475	0.689655	165	412.5	0.4	0.0932168	0.039948	8	0.0324846	0.0139818	8
238	Vigueira 2017	The beneficial metabolic effects of insulin sensitizers are not attenuated by mitochondrial pyruvate carrier 2 hypomorphism	High Fat Diet / HFD	High Fat Diet / HFD	C57BL/6?	C57BL/6?	1	1	0	0	2				60	M	Vigueira 2017_2	Pioglitazone			300ppm	Thiazolidinediones (Pioglitazone)	Thiazolidinediones	4	4	5	47.5	45	1.05556	8.33	12.49	0.666934	136.35	603.6	0.225895	0.0265526	0.0158186	7	0.0638394	0.0209031	3
2541	Purushotham 2007	Maintenance of adiponectin attenuates insulin resistance induced by dietary conjugated linoleic acid in mice	Leptin Deficiency (ob/ob)	Leptin Deficiency (ob/ob)	Not stated	Not stated	1	1	0	0	2					M	Purushotham 2007	Rosiglitazone	10	mg/kg	10 mg/kg body weight	Thiazolidinediones (Rosiglitazone)	Thiazolidinediones	2	2	2.5	47.58	42.2	1.12749	3.93	6.82	0.576246				0.206682	0.0368081	2	0.205107	0.031813	2
225	Van den Hoek 2013	APOE*3Leiden.CETP transgenic mice as model for pharmaceutical treatment of the metabolic syndrome	High Fat + High Fructose Diet	High Fat + High Fructose Diet	C57BL/6J-CBA/J	Mixed	1	0	0	0	1				60	M	Van den Hoek 2013_5	Rosiglitazone	3	mg/kg	3 mg/kg	Thiazolidinediones (Rosiglitazone)	Thiazolidinediones	6	5	7.25	47.6	43.2	1.10185	8.5	10.5	0.809524	270	1012.5	0.266667	0.194456	0.139658	10	0.170615	0.112334	2
3884	Panzhinskiy 2014	Novel Curcumin Derivative CNB-001 Mitigates Obesity-Associated Insulin Resistance	High Fat Diet / HFD	High Fat Diet / HFD	C57BL/6?	C57BL/6?	1	1	0	0	2				45	M	Panzhinskiy 2014	Curcumin derivative CNB-001	40	mg/kg	40 mg/kg/day	Curcumin	Curcumin	1.75	20	6.75	47.68	55.95	0.852189	5.9385	10.767	0.551546	1287	1993.5	0.645598	0.0225	0.00612372	6	0.06	0.0195959	6
1042	Nozaki 2009	Long-term combination therapy of ezetimibe and acarbose for non-alcoholic fatty liver disease	High Fat Diet / HFD	High Fat Diet / HFD	C57BL/6J	C57BL/6J	1	1	0	0	2				57	M	Nozaki 2009_2	Ezetimibe	5	mg/kg	5 mg/kg/day	Ezetimibe	Cholesterol Absorption Inhibitor	1.75	24	7.75	47.9	54.6	0.877289	4.78965	7.15395	0.669511	480	726	0.661157	0.203382	0.0223709	8	0.259877	0.0479376	4
3545	Depner 2013	Docosahexaenoic Acid Attenuates Hepatic Inflammation, Oxidative Stress, and Fibrosis without Decreasing Hepatosteatosis in a Ldlr -/- Mouse Model of Western Diet-Induced Nonalcoholic Steatohepatitis	LDL-receptor knockout (LDL-/-) + Western diet	LDL-receptor knockout (LDL-/-) + Western diet	C57BL/6J	C57BL/6J	1	0	0	0	1	0.2			41	M	Depner 2013_1	Eicosapentaenoic acid			Not Stated	Eicosapentaenoic acid	Eicosapentaenoic acid	2	16	6	48	42	1.14286	10	11	0.909091				0.475688	0.11638	8	0.3706	0.329172	4
5233	Tiefenbach 2018	Idebenone and coenzyme Q(10) are novel PPARŒ±/Œ≥ ligands, with potential for treatment of fatty liver diseases	Leptin Receptor Deficiency (db/db)	Leptin Receptor Deficiency (db/db)	C57BL/6J	C57BL/6J	0	1	0	0	1					M	Tiefenbach 2018	Rosiglitazone	10	mg/kg	10mg/kg	Thiazolidinediones (Rosiglitazone)	Thiazolidinediones	1.75	3	2.5	48.3	41.2	1.17233							0.170615	0.0757033	8	0.131068	0.0440661	8
4317	Glien 2011	Stimatulion of fat oxidation but no sustained reduction of hepatic lipids by prolonged pharmacological inhibition of acetyl CoA carboxylase	High Fat Diet / HFD	High Fat Diet / HFD	C57BL/6N	C57BL/6N	0	0	0	0	0				60	F	Glien 2011_2	SAR210 (ACC inhibitor)	30	mg/kg	30 mg/kg	SAR210 (ACC inhibitor)	ACC inhibitor	7.5	3	8.25	48.4	47.5	1.01895	8.62	8.76	0.984018	373.5	426	0.876761	0.160446	0.0118527	8	0.145757	0.0158073	8
3033	Jelinek 2013	A high-fat diet supplemented with fish oil improves metabolic features associated with type 2 diabetes	High Fat Diet / HFD	High Fat Diet / HFD	C57BL/6J	C57BL/6J	1	0	0	0	1				45	M	Jelinek 2013	Fish oil			45g	PUFA (Fish oil)	Omega-3 polyunsaturated fatty acids (mix)	0.75	30	8.25	48.7	46.7	1.04283	10.42	10.61	0.982092	1020	790	1.29114	1.469	0.253	5	1.808	0.505	5
229	Van Rooyen 2013	Pharmacological cholesterol lowering reverses fibrotic NASH in obese, diabetic mice with metabolic syndrome	foz/foz mice + HFD	foz/foz mice + HFD	Not stated	Not stated	1	0	1	0	2	0.2				F	Van Rooyen 2013_3	Atorvastatin	20	mg/kg	20 mg/kg/day	Statin (Atorvastatin)	Statin	5	8	7	49.1	52.2	0.940613	9.26	8.35	1.10898	343.5	1170	0.29359	0.268916	0.140421	10	0.428232	0.154039	4	2.2	0.948683	10	2.6	0.565685	4	1.3	0.948683
1042	Nozaki 2009	Long-term combination therapy of ezetimibe and acarbose for non-alcoholic fatty liver disease	High Fat Diet / HFD	High Fat Diet / HFD	C57BL/6J	C57BL/6J	1	1	0	0	2				57	M	Nozaki 2009_1	Acarbose	100	mg/kg	100 mg/kg/day	Acarbose	Alpha glucosidase inhibitor	1.75	24	7.75	49.7	54.6	0.910256	5.61105	7.15395	0.784329	583.5	726	0.803719	0.248578	0.0255667	8	0.259877	0.0479376	4
229	Van Rooyen 2013	Pharmacological cholesterol lowering reverses fibrotic NASH in obese, diabetic mice with metabolic syndrome	foz/foz mice + HFD	foz/foz mice + HFD	Not stated	Not stated	1	0	1	0	2	0.2				F	Van Rooyen 2013_1	Ezetimibe	5	mg/kg	5 mg/kg/day	Ezetimibe	Cholesterol Absorption Inhibitor	5	8	7	50	52.2	0.957854	9.46	8.35	1.13293	480	1170	0.410256	0.319762	0.144352	10	0.428232	0.154039	4	2.2	0.632456	10	2.6	0.565685	4	0.9	0.632456
5006	Goto 2018	Obeticholic acid protects against hepatocyte death and liver fibrosis in a murine model of nonalcoholic steatohepatitis	MC4R-KO + Western diet	MC4R-KO + Western diet	C57BL/6J	C57BL/6J	1	0	0	0	1	0.21		34	41	M	Goto 2018_1	Obetacholic acid	6.5	mg/kg	3, 10 mg/kg/day	FXR agonist (Obetacholic acid)	FXR agonist	2	24	8	50	50	1	7.14563	8.10855	0.881246	6495	4755	1.36593	0.211856	0.0240951	19	0.203382	0.0178637	10	2.9	0.2	19	3	0.1	10	2.15	0.608
199	Cong 2008	The Establishment of a Novel Non-Alcoholic Steatohepatitis Model Accompanied with Obesity and Insulin Resistance in Mice.	High Fat Diet / HFD	High Fat Diet / HFD	C57BL/6?	C57BL/6?	1	1	1	0	3				60	M	Cong 2008_1	Rosiglitazone	15	mg/kg	15 mg/kg	Thiazolidinediones (Rosiglitazone)	Thiazolidinediones	6.2	8	8.2	50	50	1	4.44	8.33	0.533013	199.2	421.2	0.472934	0.00949116	0.00250114	10	0.0119769	0.00357306	5
1175	Tong 2016	Liraglutide ameliorates non-alcoholic fatty liver disease by enhancing mitochondrial architecture and promoting autophagy through the SIRT1/SIRT3-FOXO3a pathway	High Fat Diet / HFD	High Fat Diet / HFD	C57BL/6J	C57BL/6J	1	1	0	0	2				60	M	Tong 2016	Liraglutide	150	mg/kg	150 mg/kg	GLP-1 agonist (Liraglutide)	GLP-1 agonist	10.1	4	11.1	50	62	0.806452	7.8	10.5	0.742857				0.101691	0.0298938	7	0.45196	0.202122	5
2426	Ohyama 2014	MK-0626, a selective DPP-4 inhibitor, attenuates hepatic steatosis in ob/ob mice	Leptin Deficiency (ob/ob)	Leptin Deficiency (ob/ob)	Not stated	Not stated	1	1	0	1	3					M	Ohyama 2014_1	MK-0626	2.25	mg/kg	1.5, 3 mg/kg	MK-0626	DPP4 inhibitor	2	8	4	50	50	1	14.8463	19.3695	0.766476	48.75	69.24	0.704073	0.0485857	0.00508455	32	0.067794	0.0079093	16
2346	Sujishi 2015	Sitagliptin can inhibit the development of hepatic steatosis in highfructose dietfed ob/ob mice	Leptin Deficiency (ob/ob) + high fructose	Leptin Deficiency (ob/ob) + high fructose	Not stated	Not stated	1	0	0	0	1		60			M	Sujishi 2015	Sitagliptin			0.0018% sitagliptin phosphate monohydrate	DPP4 inhibitor (Sitagliptin)	DPP4 inhibitor	1.25	12	4.25	50.5	49	1.03061	13.3383	17.4176	0.765797	490.5	198	2.47727							1.17	0.408	6	2.17	0.408	6
1121	Li 2016a	Anti-obese effects of two Lactobacilli and two Bifidobacteria on ICR mice fed on a high fat diet	High Fat Diet / HFD	High Fat Diet / HFD	ICR	ICR	0	1	1	0	2				60		Li 2016a_2	Lactobacillus Sp.			5*10^(-8) CFU/mL in drinking water	Lactobacillus casei	Lactobacillus sp.	2	8	4	50.6	69.8	0.724928							0.12425	0.157	14	0.226	0.358	3
343	Zheng 2008	Ezetimibe improves high fat and cholesterol diet-induced non-alcoholic fatty liver disease in mice	High Fat + High Cholesterol Diet	High Fat + High Cholesterol Diet	C57BL/6J	C57BL/6J	1	0	0	0	1	0.12			45		Zheng 2008 _1	Ezetimibe	3	mg/kg	.5, 1.6, 1.8, 5.3, 5.8 mg/kg/day	Ezetimibe	Cholesterol Absorption Inhibitor	7.9	4	8.9	50.85	52.6	0.96673							0.736695	0.151863	60	0.969454	0.191789	12
4685	Tolbol 2018	Metabolic and hepatic effects of liraglutide, obeticholic acid and elafibranor in diet-induced obese mouse models of biopsy-confirmed nonalcoholic steatohepatitis	Leptin Deficiency (ob/ob) + FFC	Leptin Deficiency (ob/ob) + FFC	B6.V-Lepob/JRj	B6.V-Lepob	0	1	0	0	1	2	20		40	M	Tolbol 2018_4	Liraglutide	0.4	mg/kg	0.4 mg/kg	GLP-1 agonist (Liraglutide)	GLP-1 agonist	6.75	8	8.75	51	56.5	0.902655
4684	Roth 2018	INT-767 improves histopathological features in a diet-induced ob/ob mouse model of biopsy-confirmed non-alcoholic steatohepatitis	Leptin Deficiency (ob/ob) + FFC	Leptin Deficiency (ob/ob) + FFC	B6.V-Lepob/JRj	B6.V-Lepob	0	0	1	0	1	2	20		40	M	Roth 2018_1	INT-767	6.5	mg/kg	3, 10 mg/kg	FXR/TGR5 agonist (INT-767)	FXR agonist	5.25	8	7.25	51.95	54.6	0.951465	8.1	7.6	1.06579	640.5	567	1.12963
5006	Goto 2018	Obeticholic acid protects against hepatocyte death and liver fibrosis in a murine model of nonalcoholic steatohepatitis	MC4R-KO + Western diet	MC4R-KO + Western diet	C57BL/6J	C57BL/6J	1	0	0	0	1	0.21		34	41	M	Goto 2018_3	Obetacholic acid	10	mg/kg	10mg/kg/day	FXR agonist (Obetacholic acid)	FXR agonist	7	4	8	52	52	1	9.31845	8.325	1.11933										2.95	0.1	8	2.9	0.1	8	2.5	0.5
4483	Jouihan 2017	Superior reductions in hepatic steatosis and fibrosis with co-administration of a glucagon-like peptide-1 receptor agonist and obeticholic acid in mice	Leptin Deficiency (ob/ob) + AMLN diet	Leptin Deficiency (ob/ob) + AMLN diet	C57BL/6J	C57BL/6J	1	1	1	0	3	4	22		40	M	Jouihan 2017_1	OCA			0.05% OCA	FXR agonist (Obetacholic acid)	FXR agonist	5	3	5.75	52	52	1	11.1	12.21	0.909091	375	825	0.454545							2.6	0.516	10	3	0.1	5
875	Komiya 2016	Ipragliflozin Improves Hepatic Steatosis in Obese Mice and Liver Dysfunction in Type 2 Diabetic Patients Irrespective of Body Weight Reduction	Leptin Deficiency (ob/ob)	Leptin Deficiency (ob/ob)	C57BL/6J	C57BL/6J	1	0	0	0	1					M	Komiya 2016_1	Ipragliflozin	10	mg/kg	10 mg/kg/day	Ipragliflozin	SGLT2 inhibitor	7	4	8	52	50	1.04	5.27	13.04	0.404141				0.33897	0.0896802	7	0.248578	0.0298972	7
4472	Pang 2017	Averrhoa carambola free phenolic extract ameliorates nonalcoholic hepatic steatosis by modulating mircoRNA-34a, mircoRNA-33 and AMPK pathways in leptin receptor-deficient db/db mice	Leptin Receptor Deficiency (db/db)	Leptin Receptor Deficiency (db/db)	C57BLKS/J	C57BLKS/J	1	1	0	0	2					M	Pang 2017	Metformin	250	mg/kg	250mg/kg	Metformin	Biguanide	2	8	4	52	53	0.981132							0.24	0.14	9	0.19	0.13	9
4685	Tolbol 2018	Metabolic and hepatic effects of liraglutide, obeticholic acid and elafibranor in diet-induced obese mouse models of biopsy-confirmed nonalcoholic steatohepatitis	Leptin Deficiency (ob/ob) + FFC	Leptin Deficiency (ob/ob) + FFC	B6.V-Lepob/JRj	B6.V-Lepob	0	1	0	0	1	2	20		40	M	Tolbol 2018_5	Elafibranor / GFT505	120	mg/kg	120 mg/kg	PPARalpha-delta agonist (Elafibranor)	PPARalpha-delta agonist	6.75	8	8.75	52	56.5	0.920354
5006	Goto 2018	Obeticholic acid protects against hepatocyte death and liver fibrosis in a murine model of nonalcoholic steatohepatitis	MC4R-KO + Western diet	MC4R-KO + Western diet	C57BL/6J	C57BL/6J	1	0	0	0	1	0.21		34	41	M	Goto 2018_4	Obetacholic acid	10	mg/kg	10mg/kg/day	FXR agonist (Obetacholic acid)	FXR agonist	7	8	9	52.5	51.5	1.01942	9.9456	8.44155	1.17817										2.95	0.1	9	2.9	0.1	8	2.1	0.5
875	Komiya 2016	Ipragliflozin Improves Hepatic Steatosis in Obese Mice and Liver Dysfunction in Type 2 Diabetic Patients Irrespective of Body Weight Reduction	High Fat Diet / HFD	High Fat Diet / HFD	C57BL/6J	C57BL/6J	1	0	0	0	1				60	M	Komiya 2016_2	Ipragliflozin	10	mg/kg	10 mg/kg/day	Ipragliflozin	SGLT2 inhibitor	20	4	24	52.5	50	1.05	6.94	8.88	0.781532				0.22598	0.083703	7	0.316372	0.0597717	7
2597	Saraswathi 2009	Dietary Fish Oil Exerts Hypolipidemic Effects in Lean and Insulin Sensitizing Effects in Obese LDLR2/2 Mice	Leptin deficiency on a LDLR-/- background (ob/ob; LDLR-/-) + HFD	Leptin deficiency on a LDLR-/- background (ob/ob; LDLR-/-) + HFD	C57BL/6J	C57BL/6J	1	0	0	0	1				39	Both	Saraswathi 2009_2	Fish oil	6	%	0.06	PUFA (Fish oil)	Omega-3 polyunsaturated fatty acids (mix)	2.5	6	4	52.7	53	0.99434	4.8285	6.3825	0.756522	447	729	0.613169	0.0452	0.0232	8	0.1102	0.0193	8
710	Rull 2014	Rosiglitazone and fenofibrate exacerbate liver steatosis in a mouse model of obesity and hyperlipidaemia. A transcriptomic and metabolomic study.	Leptin deficiency on a LDLR-/- background (ob/ob; LDLR-/-)	Leptin deficiency on a LDLR-/- background (ob/ob; LDLR-/-)	C57BL/6J	C57BL/6J	1	1	0	0	2					M	Rull 2014_2	Rosiglitazone	10	mg/kg	10 mg/kg	Thiazolidinediones (Rosiglitazone)	Thiazolidinediones	3	12	6	54.9	63.6	0.863208	4.9	7.2	0.680556	6474	11844	0.546606	0.103	0.0214815	8	0.05	0.0118519	6
1922	Tajima 2013	Metformin prevents liver tumorigenesis induced by high-fat diet in C57Bl/6 mice	High Fat Diet / HFD	High Fat Diet / HFD	C57BL/6?	C57BL/6?	1	1	1	0	3				57	M	Tajima 2013_1	Metformin	250	mg/kg	250 mg/kg	Metformin	Biguanide	9.5	30	17	55	60	0.916667	5.4945	5.2725	1.04211				0.062	0.048	7	0.045	0.0112	4
3505	Matsumoto 2010	Gene expression analysis on the liver of cholestyramine-treated type 2 diabetic model mice	NSY	NSY	NSY	NSY	0	1	0	0	1					M	Matsumoto 2010	Cholestyramine	1	%	0.01	Cholestyramine	Bile acid sequestrant	1.5	8	3.5	55.2	58.2	0.948454	16.8109	23.6042	0.712203	570	1320	0.431818	0.047	0.011	8	0.09	0.036	10
271	Wan 2017	Novel GLP-1 Analog Supaglutide Reduces HFD-Induced Obesity Associated with Increased Ucp-1 in White Adipose Tissue in Mice	High Fat Diet / HFD	High Fat Diet / HFD	C57BL/6?	C57BL/6?	1	1	1	0	3				60	M	Wan 2017	Supaglutide	0.0857	mg/kg	0.3 mg/kg twice a week	Supaglutide	GLP-1 agonist	11	4	12	55.5	58.5	0.948718	4.5	7.5	0.6				0.0125	0.0033541	5	0.0175	0.00268	5
2512	Ozcan 2006	Chemical Chaperones Reduce ER Stress and Restore Glucose Homeostasis in a Mouse Model of Type 2 Diabetes	Leptin Deficiency (ob/ob)	Leptin Deficiency (ob/ob)	Not stated	Not stated	0	0	0	0	0					M	Ozcan 2006	Tauroursodeoxycholic acid (TUDCA)	500	mg/kg	500 mg/kg	Tauroursodeoxycholic acid (TUDCA)	Tauroursodeoxycholic acid (TUDCA)	2	3	2.75	56	60	0.933333	7.77	22.2	0.35	1170	2025	0.577778	0.000429362	2.2598e-05	10	0.00101691	9.0392e-05	10
1828	Sasaki 2011	Effects of bezafibrate in nonalcoholic steatohepatitis model mice with monosodium glutamate-induced metabolic syndrome	MSG (L-monosodium glutamate) injection	MSG (L-monosodium glutamate) injection	ICR	ICR	1	0	0	0	1					M	Sasaki 2011_1	Bezafibrate	0.2	%	0.001	Fibrate (Bezafibrate)	Fibrates	3	8	5	56.75	59	0.961864	11.7937	23.199	0.508373	9600	15570	0.61657	0.0376822	0.021485	19	0.045083	0.0138978	10
1826	Peng 2014	Effects and potential mechanisms of pioglitazone on lipid metabolism in obese diabetic KKAy mice	KK-Ay	KK-Ay	KK-Ay	KK-Ay	1	1	0	0	2					F	Peng 2014	Pioglitazone	25	mg/kg	25 mg/kg	Thiazolidinediones (Pioglitazone)	Thiazolidinediones	3	4	4	57	49	1.16327	8.0475	12.765	0.630435	2700	10500	0.257143	0.167225	0.0285845	10	0.126549	0.0250114	10
4685	Tolbol 2018	Metabolic and hepatic effects of liraglutide, obeticholic acid and elafibranor in diet-induced obese mouse models of biopsy-confirmed nonalcoholic steatohepatitis	Leptin Deficiency (ob/ob) + FFC	Leptin Deficiency (ob/ob) + FFC	B6.V-Lepob/JRj	B6.V-Lepob	0	1	0	0	1	2	20		40	M	Tolbol 2018_6	Obetacholic acid	120	mg/kg	120 mg/kg	FXR agonist (Obetacholic acid)	FXR agonist	6.75	8	8.75	57	56.5	1.00885
1666	Shimizu 2011	Pitavastatin suppresses diethylnitrosamine- induced liver preneoplasms in male C57BL/KsJ- db/db obese mice	Leptin Receptor Deficiency (db/db) + DEN	Leptin Receptor Deficiency (db/db) + DEN	C57BLKS/J	C57BLKS/J	1	0	0	0	1					M	Shimizu 2011_1	Pitavastatin			1, 10 ppm	Statin (Pitavastatin)	Statin	1.75	14	5.25	57.45	63.1	0.91046							0.163835	0.045196	24	0.327671	0.033897	12
1922	Tajima 2013	Metformin prevents liver tumorigenesis induced by high-fat diet in C57Bl/6 mice	High Fat Diet / HFD	High Fat Diet / HFD	C57BL/6?	C57BL/6?	1	1	1	0	3				57	M	Tajima 2013_3	Metformin	250	mg/kg	250 mg/kg/day	Metformin	Biguanide	2	60	17	58	58	1	5.55	5.55	1				0.113	0.0231	17	0.0791	0.0697	17	2	0.9	17	2	0.1	17
710	Rull 2014	Rosiglitazone and fenofibrate exacerbate liver steatosis in a mouse model of obesity and hyperlipidaemia. A transcriptomic and metabolomic study.	Leptin deficiency on a LDLR-/- background (ob/ob; LDLR-/-)	Leptin deficiency on a LDLR-/- background (ob/ob; LDLR-/-)	C57BL/6J	C57BL/6J	1	1	0	0	2					M	Rull 2014_1	Fenofibrate	50	mg/kg	50 mg/kg	Fibrate (Fenofibrate)	Fibrates	3	12	6	58.3	63.6	0.916667	7.2	7.2	1	9066	11844	0.765451	0.068	0.00740741	8	0.05	0.0118519	6
1393	Kim 2008	Dietary docosahexaenoic acid-rich diacylglycerols ameliorate hepatic steatosis and alter hepatic gene expressions in C57BL/6J-Lep ob/ob mice	Leptin Receptor Deficiency (db/db) + High Fat High Cholesterol High Sucrose Diet	Leptin Receptor Deficiency (db/db) + High Fat High Cholesterol High Sucrose Diet	C57BL/6J	C57BL/6J	1	1	0	0	2	0.2		31	40	M	Kim 2008_1	Docosahexaenoic acid	2.425	%	1.34, 3.51% w/w diet ad libitum	Docosahexaenoic acid	Docosahexaenoic acid	1	12	4	58.85	58	1.01466	14.35	14	1.025				0.2412	0.0219778	20	0.2623	0.0376311	10
4709	Haczeyni 2017b	The selective peroxisome proliferator-activated receptor-delta agonist seladelpar reverses nonalcoholic steatohepatitis pathology by abrogating lipotoxicity in diabetic obese mice	Alms1 mutant (foz/foz) + atherogenic diet	Alms1 mutant (foz/foz) + atherogenic diet	NOD.B10	NOD.B10	1	1	1	0	3	0.19	42		45	F	Haczeyni 2017b	Seladelpar (MBX-8025)	10	mg/kg	10mg/kg	Seladelpar (MBX-8025)	PPAR agonist (other)	1	16	5	59	62	0.951613	7	16	0.4375	210	1050	0.2	0.192083	0.0383488	8	0.435012	0.0479078	8	1.88	0.37	8	3	0.1	8	1.25	0.876812
2419	Sugizaki 2014	The Niemann-Pick C1 Like 1 (NPC1L1) Inhibitor Ezetimibe Improves Metabolic Disease Via Decreased Liver X Receptor (LXR) Activity in Liver of Obese Male Mice	KK-Ay + HFD	KK-Ay + HFD	KK-Ay	KK-Ay	1	0	0	0	1				60	M	Sugizaki 2014	Ezetimibe	5	mg/kg	5 mg/kg	Ezetimibe	Cholesterol Absorption Inhibitor	1.75	14	5.25	59	61	0.967213	6.9375	12.765	0.543478	757.5	1200	0.63125	0.0429362	0.0378968	5	0.141237	0.0252646	5
371	Fujimoto 2012	Spirulina Improves Non-Alcoholic Steatohepatitis, Visceral Fat Macrophage Aggregation, and Serum Leptin in a Mouse Model of Metabolic Syndrome.	MSG (L-monosodium glutamate) injection	MSG (L-monosodium glutamate) injection	ICR	ICR	1	1	1	0	3					Both	Fujimoto 2012	Pioglitazone	0.02	%	0.0002	Thiazolidinediones (Pioglitazone)	Thiazolidinediones	2.8	12	5.8	60	56.3	1.06572	8.9466	8.21955	1.08845	315	960	0.328125	0.022598	0.00508455	9	0.0316372	0.0067794	9							0.75	0.75
5364	Nishitsuji 2018	Effect of coffee or coffee components on gut microbiome and short-chain fatty acids in a mouse model of metabolic syndrome	Tsumura Suzuki Obese Diabetes (TSOD)	Tsumura Suzuki Obese Diabetes (TSOD)	ddY	ddY	1	0	0	0	1					M	Nishitsuji 2018	Coffee	0.5	%	0.005	Coffee	Coffee	2	16	6	62.5	64	0.976562	19.98	16.65	1.2										0.667	0.577	3	1	0.1	3	0	0.1
286	Shirakami 2016	Pentoxifylline prevents nonalcoholic steatohepatitis-related liver pre-neoplasms by inhibiting hepatic inflammation and lipogenesis	Leptin Receptor Deficiency (db/db) + DEN	Leptin Receptor Deficiency (db/db) + DEN	C57BLKS/J	C57BLKS/J	1	0	0	0	1					M	Shirakami 2016_1	Pentoxifylline			125, 500ppm	PDE inhibitor (Pentoxifylline)	PDE inhibitor (Pentoxifylline)	1.6	15	5.35	62.7	63.1	0.993661							0.0924258	0.0183609	24	0.115702	0.00979623	12
1121	Li 2016a	Anti-obese effects of two Lactobacilli and two Bifidobacteria on ICR mice fed on a high fat diet	High Fat Diet / HFD	High Fat Diet / HFD	ICR	ICR	0	1	1	0	2				60		Li 2016a_1	Bifidobacterium sp.			5*10^(-8) CFU/mL in drinking water	Bifidobacterium longum	Bifidobacterium sp.	2	8	4	63.9	69.8	0.915473							0.1129	0.187	14	0.226	0.358	4
2772	Haczeyni 2017a	Obeticholic Acid Improves Adipose Morphometry and Inflammation and Reduces Steatosis in Dietary but not Metabolic Obesity in Mice	High Fat + High Cholesterol Diet	High Fat + High Cholesterol Diet	NOD.B10	NOD.B10	1	0	1	0	2	0.19			45	F	Haczeyni 2017a_2	Obeticholic acid	1	mg/kg	1 mg/kg/day	FXR agonist (Obetacholic acid)	FXR agonist	3	24	9	64	62	1.03226	12.5	13.5	0.925926	1245	1380	0.902174	0.0249767	0.0107043	9	0.0542352	0.0142706	9	0.22	0.337	9	0.22	0.337	9	0.01	0.1
2509	Watanabe 2017	Daily coffee intake inhibits pancreatic beta cell damage and nonalcoholic steatohepatitis in a mouse model of spontaneous metabolic syndrome, TSOD mice	Tsumura Suzuki Obese Diabetes (TSOD)	Tsumura Suzuki Obese Diabetes (TSOD)	ddY	ddY	1	0	0	0	1					M	Watanabe 2017_1	Coffee	0.01	%	1g/L	Coffee	Coffee	4.25	7	6	66.75	66.3	1.00679
1859	Ideta 2015	The Dipeptidyl Peptidase-4 Inhibitor Teneligliptin Attenuates Hepatic Lipogenesis via AMPK Activation in Non-Alcoholic Fatty Liver Disease Model Mice	MSG (L-monosodium glutamate) injection + HFD	MSG (L-monosodium glutamate) injection + HFD	ICR	ICR	1	0	0	0	1					M	Ideta 2015	Teneligliptin	30	mg/kg	30 mg/kg/day	Teneligliptin	DPP4 inhibitor	1	10	3.5	80.7	83.4	0.967626				321	345	0.930435	0.0753267	0.0447252	6	0.197732	0.0376633	6	1.66	0.52	6	3	0.1	6	1.5	0.55
128	Mnafgui 2012	Inhibitory Activities of Zygophyllum Album- A Natural Weight-Lowering Plant on Key Enzymes in High-Fat Diet-Fed Rats.	High Fat Diet / HFD	High Fat Diet / HFD	Wistar	Wistar	1	1	0	0	2				22	F	Mnafgui 2012	Fluvastatin	2	mg/kg	2 mg/kg	Statin (Fluvastatin)	Statin	1.23025	6	2.73025	155	172	0.901163							0.00813528	0.00067794	8	0.0163836	0.00124289	8
1211	Tang 2015	Hugan Qingzhi Exerts Anti-Inflammatory Effects in a Rat Mode of Nonalcoholic Fatty Liver Disease	High Fat + High Cholesterol Diet	High Fat + High Cholesterol Diet	Sprague Dawley	Sprague Dawley	0	0	0	0	0	2			22	M	Tang 2015	Fenofibrate	100	mg/kg	100 mg/kg	Fibrate (Fenofibrate)	Fibrates	1.4645	12	4.4645	160	320	0.5													0.5	0.143678	10	3	0.862069	10	0.3	0.0862069
2620	Kurikawa 2013	A Novel Inhibitor of Stearoyl-CoA Desaturase-1 Attenuates Hepatic Lipid Accumulation, Liver Injury and Inflammation in Model of Nonalcoholic Steatohepatitis	Methionine and choline deficient diet / MCD	Methionine and choline deficient diet / MCD	Col1a1-Luc Tg rat	Col1a1-Luc Tg rat	1	1	0	0	2					M	Kurikawa 2013_2	A novel SCD-1 inhibitor, N-(2-hydroxy-2-phenylethyl)-6-[4-(2-methyl benzoyl) piperi din-1-yl]pyridazine-3-carboxamide	65	mg/kg	30, 100 mg/kg	SCD-1 inhibitor	SCD-1 inhibitor	4	8	6	167.4	180.5	0.927424							0.056495	0.0415464	16	0.1096	0.0159768	8
951	Yalcin 2016	Are N-acetylcysteine and adalimumab effective for non-alcoholic steatohepatitis?	Methionine and choline deficient diet / MCD	Methionine and choline deficient diet / MCD	Wistar	Wistar	0	0	0	0	0					F	Yalcin 2016	N-acetylcysteine	20	mg/kg	20 mg/kg	N-acetylcysteine	N-acetylcysteine	2.03202	6	3.53202	175	235	0.744681													2.43	0.79	7	0.79	1.07	7	1.57	0.79
1429	Kajikawa 2010b	Highly Purified Eicosapentaenoic Acid Ethyl Ester Prevents Development of Steatosis and Hepatic Fibrosis in Rats	Methionine and choline deficient diet / MCD	Methionine and choline deficient diet / MCD	Wistar	Wistar	1	1	0	0	2					M	Kajikawa 2010b	Eicosapentaenoic acid	1000	mg/kg	1000 mg/kg	Eicosapentaenoic acid	Eicosapentaenoic acid	1.75	8	3.75	175	176	0.994318							0.235132	0.0525239	10	0.31366	0.0396609	10
1411	Kajikawa 2010a	Eicosapentaenoic Acid Attenuates Progression of Hepatic Fibrosis with Inhibition of Reactive Oxygen Species Production in Rats Fed Methionine- and Choline-Deficient Diet	Methionine and choline deficient diet / MCD	Methionine and choline deficient diet / MCD	Wistar	Wistar	1	1	0	0	2					M	Kajikawa 2010a	Eicosapentaenoic acid	1000	mg/kg	1000 mg/kg	Eicosapentaenoic acid	Eicosapentaenoic acid	4.4	8	6.4	178.7	174.3	1.02524							0.0824827	0.0106114	20	0.102482	0.0176857	20
1117	Kabel 2015	Ameliorative potential of omega 3 fatty acids and HMG-CoA reductase inhibitors on experimentally-induced non-alcoholic steatohepatitis	High Fat + High Sucrose + cholesterol	High Fat + High Sucrose + cholesterol	Wistar	Wistar	1	0	1	0	2	12		16	49	M	Kabel 2015_2	Omega 3			2.5ml/kg/day	PUFA (Omega-3 supplement)	Omega-3 polyunsaturated fatty acids (mix)	1.1121	8	3.1121	181.5	252	0.720238	4.87	7.86	0.619593	205.8	354.6	0.580372	0.0056495	0.000535959	10	0.011186	0.00142921	5
1460	Pan 2015	Resveratrol prevents hepatic steatosis andendoplasmic reticulum stress and regulates theexpression of genes involved in lipid metabolism,insulin resistance, and inflammation in rats	High Fat Diet / HFD	High Fat Diet / HFD	Sprague Dawley	Sprague Dawley	1	1	0	0	2				45	M	Pan 2015	Resveratrol	100	mg/kg	100 mg/kg	Polyphenol (Resveratrol)	Polyphenol (Resveratrol)	2.5	8	4.5	189.2	187.89	1.00697	6.69	6.76	0.989645	186	193.5	0.96124	0.03045	0.00360438	10	0.065	0.00457609	10							0.98	0.19
4127	Hussien 2017	Protective Effect of Rimonabant, a Canabinoid Receptor 1 Antagonist on Nonalcoholic Fatty Liver Disease in a Rat Model by Modulating the Hepatic Expression of Activin a and Follistatin	Choline-deficient L-amino-defined diet / CDAA	Choline-deficient L-amino-defined diet / CDAA	Sprague Dawley	Sprague Dawley	1	1	1	0	3					M	Hussien 2017	Rimonabant	10	mg/kg	10 mg/kg	Rimonabant	CB1 antagonist (Rimonabant)	1.4645	2	1.9645	198.7	196.9	1.00914													1.9	0.42	10	3	0.1	10	1.3	0.3
3597	Bujanda 2008	Resveratrol inhibits nonalcoholic fatty liver disease in rats	Fasting and refeeding high carbohydrate-fat free diet	Fasting and refeeding high carbohydrate-fat free diet	Wistar	Wistar	0	1	1	0	2					M	Bujanda 2008	Resveratrol			10 mg	Polyphenol (Resveratrol)	Polyphenol (Resveratrol)	1.51715	4	2.51715	201	226	0.889381	8.0475	8.991	0.895062										1.83	0.389	12	2.833	0.389	12
2943	Chong 2015	Fluvastatin attenuates hepatic steatosis-induced fibrogenesis in rats through inhibiting paracrine effect of hepatocyte on hepatic stellate cells.	Choline-deficient L-amino-defined diet / CDAA	Choline-deficient L-amino-defined diet / CDAA	Wistar	Wistar	1	1	1	0	3					M	Chong 2015_1	Fluvastatin	7.5	mg/kg	5, 10 mg/kg/day	Statin (Fluvastatin)	Statin	2	4	3	206	245	0.840816	7.1595	6.882	1.04032										2.85	1.395	16	3	0.1	8	0.6	1.3295
295	Kawaguchi 2004	Pioglitazone prevents hepatic steatosis, fibrosis, and enzyme-altered lesions in rat liver cirrhosis induced by a choline-deficient L-amino acid-defined diet	Choline-deficient L-amino-defined diet / CDAA	Choline-deficient L-amino-defined diet / CDAA	Wistar	Wistar	0	0	0	0	0					M	Kawaguchi 2004_1	Pioglitazone	0.01	%	0.01% w/w	Thiazolidinediones (Pioglitazone)	Thiazolidinediones	1.6	2	2.1	206	203	1.01478							0.381228	0.0152536	6	0.417385	0.0271176	6
2355	Thong-Ngam 2007	N-acetylcysteine attenuates oxidative stress and liver pathology in rats with non-alcoholic steatohepatitis	High Fat Diet / HFD	High Fat Diet / HFD	Sprague Dawley	Sprague Dawley	1	1	1	0	3				100	M	Thong-Ngam 2007	N-acetylcysteine	20	mg/kg	20 mg/kg	N-acetylcysteine	N-acetylcysteine	1.73606	6	3.23606	207.8	197	1.05482													1.44	0.726	9	2.375	0.518	9	1	1
1821	Heeboll 2015	Effect of resveratrol on experimental non-alcoholic fatty liver disease depends on severity of pathology and timing of treatment	High Fat + High Cholesterol Diet	High Fat + High Cholesterol Diet	Wistar	Wistar	1	1	1	0	3	2			65	F	Heeboll 2015_4	Resveratrol	400	mg/kg	400 mg/kg	Polyphenol (Resveratrol)	Polyphenol (Resveratrol)		7		211	211	1													3	0.1	9	3	0.1	9	0.888889	0.781736
1821	Heeboll 2015	Effect of resveratrol on experimental non-alcoholic fatty liver disease depends on severity of pathology and timing of treatment	High Fat + High Cholesterol Diet	High Fat + High Cholesterol Diet	Wistar	Wistar	1	1	1	0	3	2			65	F	Heeboll 2015_5	Resveratrol	400	mg/kg	400 mg/kg	Polyphenol (Resveratrol)	Polyphenol (Resveratrol)		8		211	211	1													3	0.1	9	3	0.1	9	1.33	1.11
108	Govindaraj 2016	Hepatoprotective Effect of Tricholoma giganteum (Agaricomycetes) in a Nonalcoholic Fatty Liver Disease Rat Model.	High Fat + High Fructose Diet	High Fat + High Fructose Diet	Wistar	Wistar	1	1	0	0	2		17.2		38	M	Govindaraj 2016	Silymarin	30	mg/kg	30 mg/kg	Silymarin	Silymarin	3.2	4	4.2	211.25	217.5	0.971264							0.0146887	0.00304445	6	0.0232985	0.00705758	6
2481	Zamin 2010	THE VITAMIN E REDUCES LIVER LIPOPEROXIDATION AND FIBROSIS IN A MODEL OF NONALCOHOLIC STEATOHEPATITIS﻿	Methionine and choline deficient diet / MCD	Methionine and choline deficient diet / MCD	Wistar	Wistar	1	1	1	0	3					M	Zamin 2010_1	Metformin	35	mg/kg	35 mg/kg	Metformin	Biguanide	1.5	12	4.5	212.6	213.2	0.997186													0.58	0.17	9	0.5	0.11	4	0.7	0.7
207	Jia 2012	The Modulation of Hepatic Adenosine Triphosphate and Inflammation by Eicosapentaenoic Acid During Severe Fibrotic Progression in the Shrsp5/Dmcr Rat Model.	High Fat + High Cholesterol Diet	High Fat + High Cholesterol Diet	SHRSP5/Dmcr	SHRSP5/Dmcr	1	1	0	0	2	5			47	M	Jia 2012_3	Eicosapentaenoic acid	1000	mg/kg	1000 mg/kg	Eicosapentaenoic acid	Eicosapentaenoic acid	2.3	2	2.8	221	242	0.913223							0.0632744	0.0158186	6	0.0632744	0.0305073	6	3	0.1	6	3	0.1	6	0.9	0.1
269	Okura 2017	Combined treatment with dipeptidyl peptidase-4 inhibitor (sitagliptin) and angiotensin-II type 1 receptor blocker (losartan) suppresses progression in a non-diabetic rat model of steatohepatitis	Choline-deficient L-amino-defined diet / CDAA	Choline-deficient L-amino-defined diet / CDAA	F344	F344	1	1	0	0	2					M	Okura 2017_1	Sitagliptin	150	mg/kg	150 mg/kg/day	DPP4 inhibitor (Sitagliptin)	DPP4 inhibitor	1.4	12	4.4	226	239	0.945607	9.13	9.85	0.926904	28.8	30	0.96							2.3	0.2	10	2.7	0.2	5	1.9	0.2
2481	Zamin 2010	THE VITAMIN E REDUCES LIVER LIPOPEROXIDATION AND FIBROSIS IN A MODEL OF NONALCOHOLIC STEATOHEPATITIS﻿	Methionine and choline deficient diet / MCD	Methionine and choline deficient diet / MCD	Wistar	Wistar	1	1	1	0	3					M	Zamin 2010_3	vitamin E			10 IU/kg	Vitamin E	Vitamin E	1.5	12	4.5	226.1	213.2	1.06051													0.3	0.11	10	0.5	0.11	3	0.6	0.8
4528	Fan 2017	Scutellarin Prevents Nonalcoholic Fatty Liver Disease (NAFLD) and Hyperlipidemia via PI3K/AKT-Dependent Activation of Nuclear Factor (Erythroid-Derived 2)-Like 2 (Nrf2) in Rats	Chronic stress + HFD + cholesterol	Chronic stress + HFD + cholesterol	Sprague Dawley	Sprague Dawley	1	1	0	0	2	4			22		Fan 2017	Atorvastatin	5	mg/kg	5mg/kg	Statin (Atorvastatin)	Statin	3.5	4	4.5	226.5	196.5	1.15267													1.2	0.3	8	2.5	0.3	8
2520	Shimozono 2013	Nrf2 Activators Attenuate the Progression of Nonalcoholic Steatohepatitis–Related Fibrosis in a Dietary Rat Model	Choline deficient diet	Choline deficient diet	F344	F344	1	1	1	0	3					M	Shimozono 2013	Oltipraz	60	mg/kg	60 mg/kg/day	LXR inhibitor (Oltipraz)	LXR inhibition	1.75	9	4	227	212.4	1.06874
2481	Zamin 2010	THE VITAMIN E REDUCES LIVER LIPOPEROXIDATION AND FIBROSIS IN A MODEL OF NONALCOHOLIC STEATOHEPATITIS﻿	Methionine and choline deficient diet / MCD	Methionine and choline deficient diet / MCD	Wistar	Wistar	1	1	1	0	3					M	Zamin 2010_2	Simvastatin	0.5	mg/kg	0.5 mg/kg	Statin (Simvastatin)	Statin	1.5	12	4.5	229.8	213.2	1.07786													0.51	0.1	10	0.5	0.11	3	2.1	0.9
1395	Pektas 2016	Dietary Fructose-Induced HEpatic Injury in Male and Female Rats: Influence of Resveratrol	Fructose	High fructose	Wistar	Wistar	1	0	0	0	1		10			F	Pektas 2016_1	Resveratrol	500	mg/kg	500 mg/kg	Polyphenol (Resveratrol)	Polyphenol (Resveratrol)	1	24	7	235	260	0.903846				3.12	7.455	0.418511	0.0240669	0.00745734	13	0.0479078	0.0132198	9
1117	Kabel 2015	Ameliorative potential of omega 3 fatty acids and HMG-CoA reductase inhibitors on experimentally-induced non-alcoholic steatohepatitis	High Fat + High Sucrose + cholesterol	High Fat + High Sucrose + cholesterol	Wistar	Wistar	1	0	1	0	2	12		16	49	M	Kabel 2015_1	Atorvastatin	10	mg/kg	10 mg/kg	Statin (Atorvastatin)	Statin	1.1121	8	3.1121	241.5	252	0.958333	7.68	7.86	0.977099	348	354.6	0.981387	0.00463259	0.000714611	10	0.011186	0.00142921	5
239	Vilà 2011	Reduction of liver fructokinase expression and improved hepatic inflammation and metabolism in liquid fructose-fed rats after atorvastatin treatment	Fructose	High fructose	Sprague Dawley	Sprague Dawley	1	1	1	0	3		10			M	Vilà 2011	Atorvastatin	30	mg/kg	30 mg/kg/day	Statin (Atorvastatin)	Statin		2		242	244	0.991803	8.71	9.05	0.962431	60	45	1.33333	0.00576249	0.00169485	10	0.00937817	0.00293774	10
269	Okura 2017	Combined treatment with dipeptidyl peptidase-4 inhibitor (sitagliptin) and angiotensin-II type 1 receptor blocker (losartan) suppresses progression in a non-diabetic rat model of steatohepatitis	Choline-deficient L-amino-defined diet / CDAA	Choline-deficient L-amino-defined diet / CDAA	F344	F344	1	1	0	0	2					M	Okura 2017_3	Losartan	30	mg/kg	30 mg/kg/day	ARB (Losartan)	Angiotensin Receptor Blocker	1.4	12	4.4	244.3	239	1.02218	10.18	9.85	1.0335	28.2	30	0.94							2.6	0.2	10	2.7	0.2	5	1.9	0.4
1821	Heeboll 2015	Effect of resveratrol on experimental non-alcoholic fatty liver disease depends on severity of pathology and timing of treatment	High Fat + High Cholesterol Diet	High Fat + High Cholesterol Diet	Wistar	Wistar	1	1	1	0	3	2			65	M	Heeboll 2015_6	Resveratrol	400	mg/kg	400 mg/kg	Polyphenol (Resveratrol)	Polyphenol (Resveratrol)		8		245	242	1.0124													3	0.1	8	2.875	0.35	8	1.125	0.65
1821	Heeboll 2015	Effect of resveratrol on experimental non-alcoholic fatty liver disease depends on severity of pathology and timing of treatment	High Fat Diet / HFD	High Fat Diet / HFD	Wistar	Wistar	1	1	1	0	3				60	M	Heeboll 2015_3	Resveratrol	400	mg/kg	400 mg/kg	Polyphenol (Resveratrol)	Polyphenol (Resveratrol)		8		246	245	1.00408													1	0.1	9	1.875	0.834	9
600	Akaslan 2013	Effects of Sitagliptin on Nonalcoholic Fatty Liver Disease in Diet-Induced Obese Rats.	High Fat + High Cholesterol Diet	High Fat + High Cholesterol Diet	Sprague Dawley	Sprague Dawley	1	1	1	0	3	2			59	F	Akaslan 2013	Sitagliptin	3	mg/kg	3 mg/kg	DPP4 inhibitor (Sitagliptin)	DPP4 inhibitor	8.3	4	9.3	247.9	291.3	0.851013	7.8144	12.4708	0.626613	0.0948	0.168	0.564286							1.2	0.4	10	2.125	0.599	8	0.4	0.49
4863	Kabil 2018	Canagliflozin protects against non-alcoholic steatohepatitis in type-2 diabetic rats through zinc alpha-2 glycoprotein up-regulation	Nicotinamide and streptozotocin + FFC	Nicotinamide and streptozotocin + FFC	Wistar	Wistar	1	1	1	0	3	2	22		40	M	Kabil 2018_1	Canagliflozin	15	mg/kg	10, 20 mg/kg/day	Canagliflozin	SGLT2 inhibitor	1.75	8	3.75	248.5	260	0.955769	7.65151	14.4084	0.531047	15.75	15	1.05	1.825	0.12	12	2.1	0.12	6							1.3	0.930806
207	Jia 2012	The Modulation of Hepatic Adenosine Triphosphate and Inflammation by Eicosapentaenoic Acid During Severe Fibrotic Progression in the Shrsp5/Dmcr Rat Model.	High Fat + High Cholesterol Diet	High Fat + High Cholesterol Diet	SHRSP5/Dmcr	SHRSP5/Dmcr	1	1	0	0	2	5			47	M	Jia 2012_1	Eicosapentaenoic acid	1000	mg/kg	1000 mg/kg	Eicosapentaenoic acid	Eicosapentaenoic acid	2.3	14	5.8	251	277	0.906137							0.0271176	0.0101691	6	0.0316372	0.0079093	6	3	0.1	6	3	0.1	6	1.4	0.4
207	Jia 2012	The Modulation of Hepatic Adenosine Triphosphate and Inflammation by Eicosapentaenoic Acid During Severe Fibrotic Progression in the Shrsp5/Dmcr Rat Model.	High Fat + High Cholesterol Diet	High Fat + High Cholesterol Diet	SHRSP5/Dmcr	SHRSP5/Dmcr	1	1	0	0	2	5			47	M	Jia 2012_2	Eicosapentaenoic acid	1000	mg/kg	1000 mg/kg	Eicosapentaenoic acid	Eicosapentaenoic acid	2.3	8	4.3	251	268	0.936567							0.0203382	0.0079093	6	0.0406764	0.0135588	6	3	0.1	6	3	0.1	6	1.3	0.2
3333	Maiztegui 2011	Sitagliptin prevents the development of metabolic and hormonal disturbances, increased b-cell apoptosis and liver steatosis induced by a fructose-rich diet in normal rats	Fructose	High fructose	Wistar	Wistar	1	1	1	0	3		10			M	Maiztegui 2011_1	Exendin-4	0.00147	mg/kg	0.35nmol/kg	GLP-1 agonist (Exenatide)	GLP-1 agonist	1.37538	3	2.12538	251	278	0.902878	4.19	4.94	0.848178	45	163.5	0.275229	0.00423374	0.000843862	20	0.00537832	0.00151087	10
4227	Qi 2011	Osthole ameliorates insulin resistance by increment of adiponectin release in high-fat and high-sucrose-induced fatty liver rats	High Fat + High Sucrose	High Fat + High Sucrose	Sprague Dawley	Sprague Dawley	1	1	1	0	3			9	77	M	Qi 2011_1	Rosiglitazone	4	mg/kg	4 mg/kg	Thiazolidinediones (Rosiglitazone)	Thiazolidinediones	3.04748	4	4.04748	266.7	267.4	0.997382	6.56	7.33	0.894952	45960	60375	0.761242	0.013491	0.00239395	10	0.020293	0.00489509	5
2524	Liang 1999	A study of the ameliorating effects of carnitine on hepatic steatosis induced by total parenteral nutrition in rats	Total Parenteral Nutrition (TPN)	Total Parenteral Nutrition (TPN)	Wistar	Wistar	0	1	0	0	1					M	Liang 1999_2	Carnitine	100	mg/kg	100 mg/kg body weight	Carnitine	Carnitine	1.71967	1	1.96967	270.8	268.1	1.01007							0.017	0.00395	6	0.03933	0.00076	6
4227	Qi 2011	Osthole ameliorates insulin resistance by increment of adiponectin release in high-fat and high-sucrose-induced fatty liver rats	High Fat + High Sucrose	High Fat + High Sucrose	Sprague Dawley	Sprague Dawley	1	1	1	0	3			9	77	M	Qi 2011_2	Fenofibrate	30	mg/kg	30mg/kg	Fibrate (Fenofibrate)	Fibrates	3.04748	4	4.04748	271.2	267.4	1.01421	8.63	7.33	1.17735	41100	60375	0.680745	0.0117284	0.00239395	10	0.020293	0.00489509	5
3333	Maiztegui 2011	Sitagliptin prevents the development of metabolic and hormonal disturbances, increased b-cell apoptosis and liver steatosis induced by a fructose-rich diet in normal rats	Fructose	High fructose	Wistar	Wistar	1	1	1	0	3		10			M	Maiztegui 2011_2	Sitagliptin	115.2	mg/kg	115.2mg/day	DPP4 inhibitor (Sitagliptin)	DPP4 inhibitor	1.37538	3	2.12538	281	278	1.01079	4.68	4.94	0.947368	46.5	163.5	0.284404	0.00338744	0.00151087	20	0.00537832	0.00151087	10
3034	Abd El-Haleim 2014	Resveratrol and fenofibrate ameliorate fructose-induced nonalcoholic steatohepatitis by modulation of genes expression	Fructose	High fructose	Not stated (albino)	Not stated (albino)	1	1	0	0	2		10			M	Abd El-Haleim 2014_1	Fenofibrate	100	mg/kg	100 mg/kg	Fibrate (Fenofibrate)	Fibrates	3.79	3	4.54	287	325	0.883077	4.9395	5.106	0.967391	82.5	112.5	0.733333	0.096	0.0175	10	0.181	0.05	5
3034	Abd El-Haleim 2014	Resveratrol and fenofibrate ameliorate fructose-induced nonalcoholic steatohepatitis by modulation of genes expression	Fructose	High fructose	Not stated (albino)	Not stated (albino)	1	1	0	0	2		10			M	Abd El-Haleim 2014_3	Resveratrol	70	mg/kg	70 mg/kg	Polyphenol (Resveratrol)	Polyphenol (Resveratrol)	3.79	3	4.54	287	325	0.883077	4.884	5.106	0.956522	90	112.5	0.8	0.124	0.0525	10	0.181	0.05	5
605	Liu 2016	Eicosapentaenoic Acid-Enriched Phosphatidylcholine Attenuated Hepatic Steatosis through Regulation of Cholesterol Metabolism in Rats with Nonalcoholic Fatty Liver Disease.	Orotic Acid	Orotic Acid	Wistar	Wistar	1	1	0	0	2					M	Liu 2016_2	EPA-PC	60	mg/kg	40, 80 mg/kg	Eicosapentaenoic acid	Eicosapentaenoic acid	1.12	3	1.87	293.8	284	1.03451							0.051241	0.0067794	20	0.143	0.0108	3
605	Liu 2016	Eicosapentaenoic Acid-Enriched Phosphatidylcholine Attenuated Hepatic Steatosis through Regulation of Cholesterol Metabolism in Rats with Nonalcoholic Fatty Liver Disease.	Orotic Acid	Orotic Acid	Wistar	Wistar	1	1	0	0	2					M	Liu 2016_3	Lovastatin	5	mg/kg	5 mg/kg	Lovastatin	Statin	1.12	3	1.87	295	284	1.03873							0.0861	0.0184	10	0.143	0.0108	4
664	Sadi 2014	High-Fructose Corn Syrup-Induced Hepatic Dysfunction in Rats Improving Effect of Resveratrol.	Fructose	High fructose	Wistar	Wistar	1	1	0	0	2		20			M	Sadi 2014	Resveratrol	500	mg/kg	500 mg/kg	Polyphenol (Resveratrol)	Polyphenol (Resveratrol)	2.5	12	5.5	296	295	1.00339							0.0307333	0.00767001	8	0.0431622	0.00479371	8
3669	Ackerman 2005	Fructose-induced fatty liver disease: hepatic effects of blood pressure and plasma triglyceride reduction.	High Fat + High Fructose Diet	High Fat + High Fructose Diet	Sprague Dawley	Sprague Dawley	1	1	1	0	3		60		12	M	Ackerman 2005_2	Captopril	90	mg/kg	90 mg/kg/day	Captopril	ACE inhibitor	1.4645	5	2.7145	296	307	0.964169	8.7	9	0.966667	205.2	258	0.795349	0.0067794	0.00127834	8	0.0137848	0.00313127	6
605	Liu 2016	Eicosapentaenoic Acid-Enriched Phosphatidylcholine Attenuated Hepatic Steatosis through Regulation of Cholesterol Metabolism in Rats with Nonalcoholic Fatty Liver Disease.	Orotic Acid	Orotic Acid	Wistar	Wistar	1	1	0	0	2					M	Liu 2016_1	Eicosapentaenoic acid	22.5	mg/kg	15, 30 mg/kg	Eicosapentaenoic acid	Eicosapentaenoic acid	1.12	3	1.87	296.3	284	1.04331							0.0668901	0.0144062	20	0.143	0.0108	4
3626	Zhou 2008	Chronic Effects of Berberine on Blood, Liver Glucolipid Metabolism andLiver PPARs Expression in Diabetic Hyperlipidemic Rats	High Fat + High Sucrose	High Fat + High Sucrose	Wistar	Wistar	1	0	0	0	1				45	M	Zhou 2008_2	Fenofibrate	100	mg/kg	100 mg/kg/day	Fibrate (Fenofibrate)	Fibrates				306.7	348.6	0.879805	23.4	23.8	0.983193				0.0203382	0.00395465	10	0.0316372	0.0067794	3
1820	Ibanez 2006	Effect of losartan on early liver fibrosis development in a rat model of nonalcoholic steatohepatitis	Choline deficient diet	Choline deficient diet	Sprague Dawley	Sprague Dawley	1	1	1	0	3					M	Ibanez 2006	Losartan	10	mg/kg	10 mg/kg	ARB (Losartan)	Angiotensin Receptor Blocker	1.32873	12	4.32873	307	296	1.03716
2292	Forcheron 2009	Nonalcoholic Hepatic Steatosis in Zucker Diabetic Rats: Spontaneous Evolution and Effects of Metformin and Fenofibrate	Zucker	Zucker	Zucker	Zucker	0	0	0	0	0					M	Forcheron 2009_4	Fenofibrate	100	mg/kg	100 mg/kg/day	Fibrate (Fenofibrate)	Fibrates	1.61	7	3.36	310	340	0.911765	31	31	1				0.0056	0.00268	5	0.0132	0.00537	3
2292	Forcheron 2009	Nonalcoholic Hepatic Steatosis in Zucker Diabetic Rats: Spontaneous Evolution and Effects of Metformin and Fenofibrate	Zucker	Zucker	Zucker	Zucker	0	0	0	0	0					M	Forcheron 2009_2	Fenofibrate	100	mg/kg	100 mg/kg/day	Fibrate (Fenofibrate)	Fibrates	1.61	14	5.11	315	350	0.9	32	32	1				0.0088	0.00358	5	0.0124	0.00179	3
3669	Ackerman 2005	Fructose-induced fatty liver disease: hepatic effects of blood pressure and plasma triglyceride reduction.	High Fat + High Fructose Diet	High Fat + High Fructose Diet	Sprague Dawley	Sprague Dawley	1	1	1	0	3		60		12	M	Ackerman 2005_1	Bezafibrate	10	mg/kg	10 mg/kg/day	Fibrate (Bezafibrate)	Fibrates	1.4645	5	2.7145	316	307	1.02932	7.2	9	0.8	174.6	258	0.676744	0.00305073	0.000357306	10	0.0137848	0.00313127	6
4087	Pasarín 2011	Insulin Resistance and Liver Microcirculation in a Rat Model of Early Nafld	High Fat Diet / HFD	High Fat Diet / HFD	Wistar	Wistar	1	0	0	0	1				59	M	Pasarín 2011	Metformin	300	mg/kg	300 mg/kg/day	Metformin	Biguanide	1.76018	0.5	1.88518	316	298	1.0604							0.015	0.002	28	0.026	0.002	30
2014	Ackerman 2010	Hepatic Effects of Rosiglitazone in Rats with the Metabolic Syndrome	Fructose	High fructose	Sprague Dawley	Sprague Dawley	1	1	1	0	3		60			M	Ackerman 2010	Rosiglitazone	10	mg/kg	10 mg/kg/day	Thiazolidinediones (Rosiglitazone)	Thiazolidinediones	3	2	3.5	321	303	1.05941	4.1	4	1.025	239.4	234.6	1.02046							1.78	0.96	9	2.05	0.917061	10	0.44	0.36
3626	Zhou 2008	Chronic Effects of Berberine on Blood, Liver Glucolipid Metabolism andLiver PPARs Expression in Diabetic Hyperlipidemic Rats	High Fat + High Sucrose	High Fat + High Sucrose	Wistar	Wistar	1	0	0	0	1				45	M	Zhou 2008_1	Berberine	175	mg/kg	30, 75, 150 mg/kg/day	Berberine	Berberine				321.07	348.6	0.921027	12.87	23.8	0.540756				0.0248578	0.00448194	30	0.0316372	0.0067794	4
2524	Liang 1999	A study of the ameliorating effects of carnitine on hepatic steatosis induced by total parenteral nutrition in rats	CCl4 + Total Parenteral Nutrition (TPN)	CCl4 + Total Parenteral Nutrition (TPN)	Wistar	Wistar	0	1	0	0	1					M	Liang 1999_1	Carnitine	100	mg/kg	100 mg/kg body weight	Carnitine	Carnitine	3.84233	1	4.09233	321.8	318.7	1.00973							0.01311	0.00842	6	0.02658	0.00276	7
2342	Sugatani 2010	Nutritional Status Affects Fluvastatin-Induced Hepatotoxicity and Myopathy in Rats	High Fat + High Cholesterol Diet	High Fat + High Cholesterol Diet	Wistar	Wistar	1	1	0	0	2	0.5			24	M	Sugatani 2010_2	Fluvastatin	8	mg/kg	8 mg/kg/day	Statin (Fluvastatin)	Statin	2	1.14	2.285	322	336	0.958333							0.0558736	0.0188015	4	0.050258	0.0149599	4
5153	Lu 2018	Ilexgenin A enhances the effects of simvastatin on non-alcoholic fatty liver disease without changes in simvastatin pharmacokinetics	High Fat + High Cholesterol Diet	High Fat + High Cholesterol Diet	Sprague Dawley	Sprague Dawley	1	1	0	0	2	1			22	M	Lu 2018	Simvastatin	3.6	mg/kg	3.6mg/kg	Statin (Simvastatin)	Statin	2.5	2	3	325	340	0.955882	8	10	0.8	420	510	0.823529	0.011299	0.00056495	6	0.0197733	0.00056495	6
2342	Sugatani 2010	Nutritional Status Affects Fluvastatin-Induced Hepatotoxicity and Myopathy in Rats	High Fat + High Cholesterol Diet	High Fat + High Cholesterol Diet	Wistar	Wistar	1	1	0	0	2	0.5			24	M	Sugatani 2010_1	Fluvastatin	4	mg/kg	4 mg/kg/day	Statin (Fluvastatin)	Statin	2	2	2.5	330	345	0.956522							0.0396595	0.0118414	4	0.0542126	0.00659862	4
1839	Sugatani 2012	Effects of dietary inulin, statin, and their co-treatment on hyperlipidemia, hepatic steatosis and changes in drug-metabolizing enzymes in rats fed a high-fat and high-sucrose diet	High fat, sucrose, cholesterol	High fat, sucrose, cholesterol	Wistar	Wistar	1	1	0	0	2	0.5		62	31	M	Sugatani 2012_2	Fluvastatin	4	mg/kg	4 mg/kg	Statin (Fluvastatin)	Statin	1.75	2	2.25	332	340	0.976471							0.054	0.022	4	0.09	0.018	4
1608	Endo 2013	Butyrate-Producing Probiotics Reduce Nonalcoholic Fatty Liver Disease Progression in Rats: New Insight into the Probiotics for the Gut-Liver Axis	Choline-deficient L-amino-defined diet / CDAA	Choline-deficient L-amino-defined diet / CDAA	F344	F344	1	0	0	0	1					M	Endo 2013	MIYAIRI 588 (probiotic)			8.5 x 10^9 cfu/g	MIYAIRI 588 (probiotic)	Probiotic (mix)		50		335	340	0.985294	2.775	3.441	0.806452	36	84	0.428571	1.083	0.2083	6	1.396	0.2083	6
978	Salomone 2013	Coffee enhances the expression of chaperones and antioxidant proteins in rats with nonalcoholic fatty liver disease	High Fat Diet / HFD	High Fat Diet / HFD	Wistar	Wistar	1	1	1	0	3				58	M	Salomone 2013	Coffee			4:1 powder	Coffee	Coffee	2.41589	8	4.41589	350	360	0.972222							0.00960415	0.000271176	6	0.0203382	0.000553651	6
4554	Cheng 2018	Diosgenin prevents high-fat diet-induced rat non-alcoholic fatty liver disease through the AMPK and LXR signaling pathways	High Fat Diet / HFD	High Fat Diet / HFD	Sprague Dawley	Sprague Dawley	1	1	0	0	2				45	M	Cheng 2018	Fenofibrate	0.02	%	0.0002	Fibrate (Fenofibrate)	Fibrates	1.75	16	5.75	350	400	0.875							0.0214681	0.0146887	8	0.0429362	0.0124289	8
3626	Zhou 2008	Chronic Effects of Berberine on Blood, Liver Glucolipid Metabolism andLiver PPARs Expression in Diabetic Hyperlipidemic Rats	High Fat + High Sucrose	High Fat + High Sucrose	Wistar	Wistar	1	0	0	0	1				45	M	Zhou 2008_3	Rosiglitazone	4	mg/kg	4 mg/kg/day	Thiazolidinediones (Rosiglitazone)	Thiazolidinediones				352.1	348.6	1.01004	7.4	23.8	0.310924				0.0299424	0.0033897	10	0.0316372	0.0067794	3
3349	Miranda-Henrique 2014	GINSENG, GREEN TEA OR FIBRATE: valid options for nonalcoholic steatohepatitis prevention?	High Fat Diet / HFD	High Fat Diet / HFD	Wistar	Wistar	1	1	0	0	2				58		Miranda-Henrique 2014	Bezafibrate	100	mg/kg	100 mg/kg/day	Fibrate (Bezafibrate)	Fibrates	8	8	10	354.6	405.2	0.875123	8.6025	12.9648	0.663527	297	531	0.559322							0.01	0.1	10	3	0.42	10	0.01	0.52
2292	Forcheron 2009	Nonalcoholic Hepatic Steatosis in Zucker Diabetic Rats: Spontaneous Evolution and Effects of Metformin and Fenofibrate	Zucker	Zucker	Zucker	Zucker	0	0	0	0	0					M	Forcheron 2009_3	Metformin	300	mg/kg	300 mg/kg/day	Metformin	Biguanide	1.61	7	3.36	355	340	1.04412	31	31	1				0.0148	0.00358	5	0.0132	0.00537	2
1376	Zhang 2013c	Silibinin ameliorates steatosis and insulin resistance during non-alcoholic fatty liver disease development partly through targeting IRS-1/PI3K/Akt pathway	High Fat Diet / HFD	High Fat Diet / HFD	Sprague Dawley	Sprague Dawley	1	1	0	0	2				45	M	Zhang 2013c	Silibinin	100	mg/kg	100 mg/kg/day	Silibinin	Silymarin	2.375	12	5.375	357	388	0.920103	4.2	5.95	0.705882	157.5	225	0.7
1854	Wei 2008	Angiotensin II-induced non-alcoholic fatty liver disease is mediated by oxidative stress in transgenic TG(mRen2)27(Ren2) rats⋆	transgenic TG(mRen2)27(Ren2) rats (heterozygous) (+/−)	transgenic TG(mRen2)27(Ren2) rats (heterozygous) (+/−)	Sprague Dawley	Sprague Dawley	1	1	0	0	2					M	Wei 2008	Valsartan	30	mg/kg	30 mg/kg/day	Valsartan	Angiotensin Receptor Blocker	2.25	3	3	364	369	0.98645							0.0007	0.0001587	7	0.00141	0.00017146	6	0.42	0.687895	7	1.36	0.930806	6
623	Azeemuddin 2015	Extract of a Polyherbal Formulation Ameliorates Experimental Nonalcoholic Steatohepatitis.	High Fat + High Cholesterol Diet	High Fat + High Cholesterol Diet	Wistar	Wistar	1	1	0	0	2	2			22	M	Azeemuddin 2015	Pioglitazone	4	mg/kg	4 mg/kg	Thiazolidinediones (Pioglitazone)	Thiazolidinediones	12.5	6	14	365	375	0.973333	2.664	4.35675	0.611465	204	316.26	0.645039													1.333	0.933381
1395	Pektas 2016	Dietary Fructose-Induced HEpatic Injury in Male and Female Rats: Influence of Resveratrol	Fructose	High fructose	Wistar	Wistar	1	0	0	0	1		10			M	Pektas 2016_2	Resveratrol	500	mg/kg	500 mg/kg	Polyphenol (Resveratrol)	Polyphenol (Resveratrol)	1	24	7	371	415	0.893976				1.92	6.57	0.292237	0.0293774	0.0128809	13	0.0485857	0.0183044	9
4086	Ota 2007	Insulin Resistance Accelerates a Dietary Rat Model of Nonalcoholic Steatohepatitis	Methionine and choline deficient diet / MCD	Methionine and choline deficient diet / MCD	Long Evans	Long Evans	0	0	1	0	1					M	Ota 2007_1	Pioglitazone	5	mg/kg	5 mg/kg/day	Thiazolidinediones (Pioglitazone)	Thiazolidinediones	6	8	8	374	384	0.973958	5.1	6.5	0.784615	25	20.9	1.19617	0.081	0.003	5	0.079	0.004	8
1461	Marsman 2010	Reversal of hepatic steatosis by omega-3 fatty acidsmeasured non-invasively by1H-magnetic resonancespectroscopy in a rat model	Methionine and choline deficient diet / MCD	Methionine and choline deficient diet / MCD	Wistar	Wistar	1	1	1	0	3					M	Marsman 2010	Omega 3			750 mg/kg	PUFA (Omega-3 supplement)	Omega-3 polyunsaturated fatty acids (mix)	2.5	2	3	380	405	0.938272																			0.4	0.3
1152	de Souza Marinho 2017	Rosuvastatin limits the activation of hepatic stellate cells in diet-induced obese mice	High Fat + High Cholesterol Diet	High Fat + High Cholesterol Diet	C57BL/6?	C57BL/6?	1	1	0	0	2	1.25			50	M	de Souza Marinho 2017	Rosuvastatin	20	mg/kg	20 mg/kg	Statin (Rosuvastatin)	Statin	3	7	4.75	380	400	0.95							0.00192083	0.000237279	10	0.00463259	0.000384166	10
2292	Forcheron 2009	Nonalcoholic Hepatic Steatosis in Zucker Diabetic Rats: Spontaneous Evolution and Effects of Metformin and Fenofibrate	Zucker	Zucker	Zucker	Zucker	0	0	0	0	0					M	Forcheron 2009_1	Metformin	300	mg/kg	300 mg/kg/day	Metformin	Biguanide	1.61	14	5.11	380	350	1.08571	32	32	1				0.0092	0.00089	5	0.0124	0.00179	2
932	Miotto 2016	Alpha-Linolenic acid supplementation and exercise training reveal independent and additive responses on hepatic lipid accumulation in obese rats	Zucker	Zucker	Zucker	Zucker	1	1	0	0	2					M	Miotto 2016_1	Alpha-linoleic acid	10	%	10% flaxseed + exercise	Alpha-linoleic acid	Alpha-linoleic acid	1.5	4	2.5	381.8	379.5	1.00606							1.35	0.11	5	1.48	0.11	5
1580	Kurita 2008	Olmesartan ameliorates a dietary rat model of non-alcoholic steatohepatitis through its pleiotropic effects	Methionine and choline deficient diet / MCD	Methionine and choline deficient diet / MCD	Long Evans	Long Evans	1	0	1	0	2					M	Kurita 2008_1	Olmesartan			0.0001	ARB (Olmesartan)	Angiotensin Receptor Blocker	6	8	8	385	404	0.95297	6.1	6.5	0.938462	170	497	0.342052	0.0700538	0.0203382	8	0.0734435	0.0127792	8							1	0.1
1834	Samuhasaneeto 2007	Effects of N-acetylcysteine on oxidative stress in rats with non-alcoholic steatohepatitis	High Fat Diet / HFD	High Fat Diet / HFD	Sprague Dawley	Sprague Dawley	1	1	1	0	3				100	M	Samuhasaneeto 2007_1	N-acetylcysteine	225.714	mg/kg	20, 500 mg/kg	N-acetylcysteine	N-acetylcysteine	1.73606	4	2.73606	395.001	411.73	0.95937													0.142857	0.3	21	0.09	0.3	11
85	Chicco 2016	Effects of Post-Suckling N-3 Polyunsaturated Fatty Acids- Prevention of Dyslipidemia and Liver Steatosis Induced in Rats by a Sucrose-Rich Diet During Pre- and Post-Natal Life.	Maternal Sucrose Rich Diet + SRD in offspring	Maternal Sucrose Rich Diet + SRD in offspring	Wistar	Wistar	1	0	0	0	1			66	14	M	Chicco 2016	Fish oil	5	%	5% by weight in diet	PUFA (Fish oil)	Omega-3 polyunsaturated fatty acids (mix)	0.7	18.4	5.3	398.6	400.25	0.995878							0.01013	0.0038212	24	0.01869	0.00700554	24
932	Miotto 2016	Alpha-Linolenic acid supplementation and exercise training reveal independent and additive responses on hepatic lipid accumulation in obese rats	Zucker	Zucker	Zucker	Zucker	1	1	0	0	2					M	Miotto 2016_2	Alpha-linoleic acid	10	%	10% flaxseed + sedentary	Alpha-linoleic acid	Alpha-linoleic acid	1.5	4	2.5	401	422	0.950237							1.56	0.11	5	1.55	0.22	5
4003	Miyaki 2011	Pitavastatin inhibits hepatic steatosis and fibrosis in non-alcoholic steatohepatitis model rats	Methionine and choline deficient diet / MCD	Methionine and choline deficient diet / MCD	Wistar	Wistar	1	1	0	0	2					M	Miyaki 2011_2	Pitavastatin	5	mg/kg	5 mg/kg	Statin (Pitavastatin)	Statin	1.5	10	4	404	398	1.01508							0.162932	0.0164965	8	0.227675	0.0427102	8
680	Li 2013g	Impairment of Reproductive Function in a Male Rat Model of Non-Alcoholic Fatty Liver Disease and Beneficial Effect of N-3 Fatty Acid Supplementation.	High Fat Diet / HFD	High Fat Diet / HFD	Sprague Dawley	Sprague Dawley	1	1	0	0	2				45	M	Li 2013g	PUFA	1.2	%	12mL/kg	PUFA (Omega-3 supplement)	Omega-3 polyunsaturated fatty acids (mix)	3	4	4	405.93	442.63	0.917087	6.17	6.34	0.973186				2.2598e-05	2.2598e-06	20	2.71176e-05	3.3897e-06	20
718	Prakash 2014	Silymarin ameliorates fructose induced insulin resistance syndrome by reducing de novo hepatic lipogenesis in the rat	Fructose	High fructose	Wistar	Wistar	1	1	0	0	2		35			M	Prakash 2014_1	Silymarin	143.333	mg/kg	30 mg/kg	Silymarin	Silymarin	4.25	3	5	406.667	390	1.04274	4.5695	5.55	0.823333	106	150	0.706667	0.000666667	0.00019	27	0.001	0.000122	6
2943	Chong 2015	Fluvastatin attenuates hepatic steatosis-induced fibrogenesis in rats through inhibiting paracrine effect of hepatocyte on hepatic stellate cells.	Choline-deficient L-amino-defined diet / CDAA	Choline-deficient L-amino-defined diet / CDAA	Wistar	Wistar	1	1	1	0	3					M	Chong 2015_2	Fluvastatin	7.5	mg/kg	5, 10 mg/kg/day	Statin (Fluvastatin)	Statin	2	8	4	409	442	0.925339	7.18725	6.8265	1.05285										2.625	1.705	16	3	0.1	8	1.3	1.328
270	Tan 2013	Managing the Combination of Nonalcoholic Fatty Liver Disease and Metabolic Syndrome with Chinese Herbal Extracts in High-Fat-Diet Fed Rats	High Fat Diet / HFD	High Fat Diet / HFD	Sprague Dawley	Sprague Dawley	1	1	1	0	3				59	M	Tan 2013	Rosiglitazone	3	mg/kg	3 mg/kg	Thiazolidinediones (Rosiglitazone)	Thiazolidinediones	2.8	4	3.8	409	414	0.987923	7.65	8.87	0.862458	144.06	277.5	0.519135	0.0145	0.000632456	10	0.0153	0.000948683	10
4991	Goedeke 2018	Acetyl-CoA Carboxylase Inhibition Reverses NAFLD and Hepatic Insulin Resistance but Promotes Hypertriglyceridemia in Rodents	High Fat + High Sucrose	High Fat + High Sucrose	Sprague Dawley	Sprague Dawley	1	1	1	1	4			1	59	M	Goedeke 2018_4	ACCi	10	mg/kg	10 mg/kg/day	ACC inhibitor	ACC inhibitor	1.5	3	2.25	409	416	0.983173	5.84415	5.7942	1.00862	115.8	95.4	1.21384	0.0158186	0.00505065	7	0.0576249	0.0277955	7
3360	Aguirre 2013	SEVERAL STATINS INCREASE BODY AND LIVER FAT ACCUMULATION IN A MODEL OF METABOLIC SYNDROME	Zucker	Zucker	Zucker	Zucker	1	1	0	0	2					M	Aguirre 2013_1	Pravastatin	0.6	mg/kg	0.6 mg/kg/day	Statin (Pravastatin)	Statin	1.4	6	2.9	412	407	1.01229	11.988	11.9325	1.00465	1533	1140	1.34474	0.0553651	0.0107192	10	0.0519754	0.0107192	2	2.1	0.994429	10	2	0.816497	2
339	Zhao 2014	Involvement of hepatic peroxisome proliferator-activated receptor a/g in the therapeutic effect of osthole on high-fat and high-sucrose-induced steatohepatitis in rats	High Fat + High Sucrose	High Fat + High Sucrose	Sprague Dawley	Sprague Dawley	1	0	0	0	1			16	72	M	Zhao 2014_1	Rosiglitazone	4	mg/kg	4 mg/kg	Thiazolidinediones (Rosiglitazone)	Thiazolidinediones	2.4	4	3.4	412.8	382.2	1.08006							0.043117	0.00866633	7	0.0771496	0.0168355	4
3360	Aguirre 2013	SEVERAL STATINS INCREASE BODY AND LIVER FAT ACCUMULATION IN A MODEL OF METABOLIC SYNDROME	Zucker	Zucker	Zucker	Zucker	1	1	0	0	2					M	Aguirre 2013_5	Fluvastatin	0.6	mg/kg	0.6 mg/kg/day	Statin (Fluvastatin)	Statin	1.4	6	2.9	414	407	1.0172	15.8175	11.9325	1.32558	1268	1140	1.11228	0.0497156	0.0107192	10	0.0519754	0.0107192	2	2.3	0.948683	10	2	0.816497	2
4086	Ota 2007	Insulin Resistance Accelerates a Dietary Rat Model of Nonalcoholic Steatohepatitis	Otsuka Long-Evans Tokushima Fatty (OLETF) rat + HFD	Otsuka Long-Evans Tokushima Fatty (OLETF) rat + HFD	Long Evans	Long Evans	0	0	1	0	1					M	Ota 2007_2	Pioglitazone	5	mg/kg	5 mg/kg/day	Thiazolidinediones (Pioglitazone)	Thiazolidinediones	6	8	8	414	398	1.0402	5.4	6.4	0.84375	24	22.5	1.06667	0.111	0.011	5	0.158	0.011	8
339	Zhao 2014	Involvement of hepatic peroxisome proliferator-activated receptor a/g in the therapeutic effect of osthole on high-fat and high-sucrose-induced steatohepatitis in rats	High Fat + High Sucrose	High Fat + High Sucrose	Sprague Dawley	Sprague Dawley	1	0	0	0	1			16	72	M	Zhao 2014_2	Fenofibrate	20	mg/kg	20 mg/kg	Fibrate (Fenofibrate)	Fibrates	2.4	4	3.4	414.8	382.2	1.0853							0.0457045	0.0102256	7	0.0771496	0.0168355	3
3360	Aguirre 2013	SEVERAL STATINS INCREASE BODY AND LIVER FAT ACCUMULATION IN A MODEL OF METABOLIC SYNDROME	Zucker	Zucker	Zucker	Zucker	1	1	0	0	2					M	Aguirre 2013_2	Simvastatin	0.6	mg/kg	0.6 mg/kg/day	Statin (Simvastatin)	Statin	1.4	6	2.9	418	407	1.02703	9.324	11.9325	0.781395	1322	1140	1.15965	0.0474558	0.0107192	10	0.0519754	0.0107192	2	1.7	0.823273	10	2	0.816497	2
3360	Aguirre 2013	SEVERAL STATINS INCREASE BODY AND LIVER FAT ACCUMULATION IN A MODEL OF METABOLIC SYNDROME	Zucker	Zucker	Zucker	Zucker	1	1	0	0	2					M	Aguirre 2013_4	Atorvastatin	0.6	mg/kg	0.6 mg/kg/day	Statin (Atorvastatin)	Statin	1.4	6	2.9	420	407	1.03194	12.099	11.9325	1.01395	1634	1140	1.43333	0.056495	0.00714612	10	0.0519754	0.0107192	2	2.4	0.843274	10	2	0.816497	2
5425	Qin 2018	Isoquercetin Improves Hepatic Lipid Accumulation by Activating AMPK Pathway and Suppressing TGF-Œ≤ Signaling on an HFD-Induced Nonalcoholic Fatty Liver Disease Rat Model	High Fat + High Cholesterol Diet	High Fat + High Cholesterol Diet	Sprague Dawley	Sprague Dawley	1	1	0	0	2	1			22	M	Qin 2018	Rosiglitazone	10	mg/kg	10mg/kg	Thiazolidinediones (Rosiglitazone)	Thiazolidinediones	2.75	5	4	420	480	0.875							0.0259877	0.0011299	6	0.0327671	0.00033897	6
3360	Aguirre 2013	SEVERAL STATINS INCREASE BODY AND LIVER FAT ACCUMULATION IN A MODEL OF METABOLIC SYNDROME	Zucker	Zucker	Zucker	Zucker	1	1	0	0	2					M	Aguirre 2013_3	Rosuvastatin	0.6	mg/kg	0.6 mg/kg/day	Statin (Rosuvastatin)	Statin	1.4	6	2.9	422	407	1.03686	14.763	11.9325	1.23721	1559	1140	1.36754	0.0711837	0.0107192	10	0.0519754	0.0107192	2	2.6	0.699206	10	2	0.816497	2
398	Wang 2016	Liver Injury Attenuation by Curcumin in a Rat Nash Model- An Nrf2 Activation-Mediated Effect?	High Fat Diet / HFD	High Fat Diet / HFD	Sprague Dawley	Sprague Dawley	1	1	1	0	3				45	M	Wang 2016	Curcumin	50	mg/kg	50 mg/kg	Curcumin	Curcumin	2.5	6	4	426.4	481.2	0.886118													1.8	1.38564	12	2.8	1.38564	12	1.6	1.73205
2075	Kim 2012b	Silymarin suppresses hepatic stellate cell activation in a dietary rat model of non-alcoholic steatohepatitis: Analysis of isolated hepatic stellate cells	Otsuka Long-Evans Tokushima Fatty (OLETF) rat + MCD	Otsuka Long-Evans Tokushima Fatty (OLETF) rat + MCD	Long Evans	Long Evans	1	0	1	0	2					M	Kim 2012b	Silymarin			0.5% w/w, in the diet	Silymarin	Silymarin	6	8	8	427.8	411.57	1.03943													3	0.1	10	3	0.1	10	1.8	0.83
5124	Cunningham 2018	Curcumin supplementation mitigates NASH development and progression in female Wistar rats	Western diet + CCl4	Western diet + CCl4	Wistar	Wistar	1	1	0	0	2	2	15	29	43	F	Cunningham 2018_1	Curcumin	100	mg/kg	100 mg/kg	Curcumin	Curcumin	8	8	10	429.78	389.35	1.10384													1.95	0.32	10	2	0.32	10	0.65	0.16
1234	Wang 2015	Amelioration of free fatty acid-induced fatty liver by quercetin-3-O-beta-D-glucuronide through modulation of peroxisome proliferator-activated receptor-alpha/sterol regulatory element-binding protein-1c signaling	High Fat + High Cholesterol Diet	High Fat + High Cholesterol Diet	Sprague Dawley	Sprague Dawley	1	1	0	0	2	2			44	M	Wang 2015	Bezafibrate	50	mg/kg	50 mg/kg	Fibrate (Bezafibrate)	Fibrates	1	8	3	430	450	0.955556							0.203382	0.056495	6	0.254227	0.0282475	6
2040	Ding 2014	Lipid modulatory activities of Cichorium glandulosum Boiss et Huet are mediated by multiple components within hepatocytes	High Fat + High Cholesterol Diet	High Fat + High Cholesterol Diet	Sprague Dawley	Sprague Dawley	1	1	0	0	2	0.5			22	M	Ding 2014	Bezafibrate	100	mg/kg	100 mg/kg/day	Fibrate (Bezafibrate)	Fibrates	1.6	9	3.85	433.15	443.63	0.976377							0.210161	0.0428458	6	0.254227	0.0332869	6
2467	Tzanetakou 2012	Water Soluble Vitamin E Administration in Wistar Rats with Non- alcoholic Fatty Liver Disease	High Fat + High Cholesterol Diet	High Fat + High Cholesterol Diet	Wistar	Wistar	1	1	0	1	3	2			40	M	Tzanetakou 2012	vitamin E			100 IU d-α tocopherol	Vitamin E	Vitamin E	6	10	8.5	435.1	452	0.962611	7.992	7.8255	1.02128				0.238	0.015	7	0.2926	0.035	7
4005	Montez 2012	Angiotensin Receptor Blockade Recovers Hepatic UCP2 Expression and Aconitase and SDH Activities and Ameliorates Hepatic Oxidative Damage in Insulin Resistant Rats	Otsuka Long-Evans Tokushima Fatty (OLETF) rat	Otsuka Long-Evans Tokushima Fatty (OLETF) rat	Long Evans	Long Evans	1	1	0	0	2					M	Montez 2012_1	Olmesartan	10	mg/kg	10 mg/kg	ARB (Olmesartan)	Angiotensin Receptor Blocker	2.25	6	3.75	437	489	0.893661							0.0110898	0.00363923	10	0.0131822	0.00496258	10
4212	Cahova 2015	Metformin prevents ischemia reperfusion-induced oxidative stress in the fatty liver by attenuation of reactive oxygen species formation	High Fat Diet / HFD	High Fat Diet / HFD	Wistar	Wistar	1	0	0	0	1				60	M	Cahova 2015	Metformin	150	mg/kg	150 mg/kg	Metformin	Biguanide	4	10	6.5	437	490	0.891837							0.0539	0.027	10	0.0605	0.036	10
703	Poulsen 2012	Resveratrol up-regulates hepatic uncoupling protein 2 and prevents development of nonalcoholic fatty liver disease in rats fed a high-fat diet	High Fat Diet / HFD	High Fat Diet / HFD	Wistar	Wistar	1	1	1	0	3				60	M	Poulsen 2012	Resveratrol			100 mg	Polyphenol (Resveratrol)	Polyphenol (Resveratrol)	2	8	4	440	434	1.01382	5.4	5.9	0.915254	390	420	0.928571	0.000101691	3.91409e-05	12	0.000167225	3.91409e-05	12
1665	Shang 2008	Resveratrol improves non-alcoholic fatty liver disease by activating AMP- activated protein kinase1	High Fat Diet / HFD	High Fat Diet / HFD	Wistar	Wistar	1	0	0	0	1				59	M	Shang 2008	Resveratrol	100	mg/kg	100 mg/kg	Polyphenol (Resveratrol)	Polyphenol (Resveratrol)	2.5	10	5	441	469	0.940299				103.8	154.8	0.670543	0.0067794	0.00285865	10	0.0101691	0.00357048	10
3203	Lieber 2007	The combination of S-adenosylmethionine and dilinoleoylphosphatidylcholine attenuates non-alcoholic steatohepatitis produced in rats by a high-fat diet	High Fat Diet / HFD	High Fat Diet / HFD	Sprague Dawley	Sprague Dawley	1	0	1	0	2				71	M	Lieber 2007	S-adenosylmethionine (SAMe)			400mg/1000 calories	S-adenosylmethionine (SAMe)	GSH-enhancing agent		6		441.5	443.8	0.994817							0.090392	0.0406764	4	0.127679	0.0415125	6
5124	Cunningham 2018	Curcumin supplementation mitigates NASH development and progression in female Wistar rats	Western diet + CCl4	Western diet + CCl4	Wistar	Wistar	1	1	0	0	2	2	15	29	43	F	Cunningham 2018_2	Curcumin	100	mg/kg	100 mg/kg	Curcumin	Curcumin	10	4	11	441.57	459.78	0.960394													2.1	0.42	10	2.8	0.16	10	0.8	0.08
349	Zhou 2015	Beneficial effects of neomangiferin on high fat diet-induced nonalcoholic fatty liver disease in rats	High Fat Diet / HFD	High Fat Diet / HFD	Sprague Dawley	Sprague Dawley	1	1	0	0	2				36	M	Zhou 2015_1	Fenofibrate	5	mg/kg	5 mg/kg/day	Fibrate (Fenofibrate)	Fibrates	1.2	6	2.7	445	450	0.988889							0.2	0.03	6	0.3	0.05	6
617	Allam 2017	Exendin-4, a Glucagon-Like Peptide-1 Receptor Agonist Downregulates Hepatic Receptor for Advanced Glycation End Products in Non-Alcoholic Steatohepatitis Rat Model.	High Fat Diet / HFD	High Fat Diet / HFD	Wistar	Wistar	1	1	0	0	2				45	M	Allam 2017_1	Exendin-4	0.0025	mg/kg	0.001, .004 mg/kg/day	GLP-1 agonist (Exenatide)	GLP-1 agonist	4	4	5	447	491.3	0.909831	9.56265	14.6132	0.654387	197.7	261.9	0.754868	0.0243832	0.00102256	20	0.0319762	0.00133328	10
360	Khaleel 2017	Resveratrol improves high-fat diet induced fatty liver and insulin resistance by concomitantly inhibiting proteolytic cleavage of sterol regulatory element-binding proteins, free fatty acid oxidation, and intestinal triglyceride absorption	High Fat Diet / HFD	High Fat Diet / HFD	Wistar	Wistar	1	0	0	0	1				40	M	Khaleel 2017	Resveratrol	20	mg/kg	20 mg/kg	Polyphenol (Resveratrol)	Polyphenol (Resveratrol)	1	8	3	450	455	0.989011	6.9375	10.545	0.657895	23.4	51	0.458824	0.000937817	5.6495e-05	8	0.00262137	0.000180784	8
4040	Haimeur 2016	Fish oil and microalga omega-3 as dietary supplements: a comparative study on cardiovascular risk factors in high-fat fed rats	High Fat Diet / HFD	High Fat Diet / HFD	Wistar	Wistar	1	1	0	0	2				40	M	Haimeur 2016	Fish oil	0.5	%	0.5% w/w	PUFA (Fish oil)	Omega-3 polyunsaturated fatty acids (mix)	1.09185	8	3.09185	460.8	460.8	1	2.9	3	0.966667	750	1160	0.646552	0.0994312	0.0101691	6	0.101691	0.0079093	6
4912	Su 2018	Chronic calcitriol supplementation improves the inflammatory profiles of circulating monocytes and the associated intestinal/adipose tissue alteration in a diet-induced steatohepatitis rat model	High Fat Diet / HFD	High Fat Diet / HFD	Sprague Dawley	Sprague Dawley	1	0	0	0	1				60	M	Su 2018	Calcitriol			0.3 μg/kg	Vitamin D	Vitamin D	2	10	4.5	462	508	0.909449	9.1797	12.6152	0.727673				0.209032	0.011299	9	0.259877	0.011299	9
5005	Li 2018a	Fatty liver mediated by peroxisome proliferator-activated receptor-Œ± DNA methylation can be reversed by a methylation inhibitor and curcumin	High fat/high sucrose diet (+ cholesterol + PTU)	High fat/high sucrose diet (+ cholesterol + PTU)	Sprague Dawley	Sprague Dawley	1	1	0	0	2	2		10	22	M	Li 2018a	Curcumin	80	mg/kg	80 mg/kg/day	Curcumin	Curcumin	2.25	8	4.25	473	688.86	0.686642	7.71	13.11	0.588101	379.98	344.46	1.10312	0.0228127	0.00806749	10	0.031931	0.00951376	7
4005	Montez 2012	Angiotensin Receptor Blockade Recovers Hepatic UCP2 Expression and Aconitase and SDH Activities and Ameliorates Hepatic Oxidative Damage in Insulin Resistant Rats	Otsuka Long-Evans Tokushima Fatty (OLETF) rat + HFD + high glucose	Otsuka Long-Evans Tokushima Fatty (OLETF) rat + HFD + high glucose	Long Evans	Long Evans	1	1	0	0	2		5			M	Montez 2012_2	Olmesartan	10	mg/kg	10 mg/kg	ARB (Olmesartan)	Angiotensin Receptor Blocker	2.25	6	3.75	474	536	0.884328							0.00962507	0.00264671	10	0.017367	0.00661677	10
1763	Ran 2004	Angiotensin II type 1 receptor blocker ameliorates overproduction and accumulation of triglyceride in the liver of Zucker fatty rats	Zucker	Zucker	Zucker	Zucker	1	0	0	0	1					M	Ran 2004	Olmesartan			0.01% olmesartan medoxomil in drinking water	ARB (Olmesartan)	Angiotensin Receptor Blocker	2	4	3	475	470	1.01064	9.7125	11.9325	0.813953	2130	2370	0.898734	0.0145305	0.00196603	12	0.0256939	0.00482467	10
2158	Zhang 2014	Extracts from Salvia-Nelumbinis naturalis alleviate hepatosteatosis via improving hepatic insulin sensitivity	High calorie diet	High calorie diet	Wistar	Wistar	1	0	0	0	1	2	15		15	M	Zhang 2014_2	Simvastatin	4	mg/kg	4 mg/kg	Statin (Simvastatin)	Statin	3.5	4	4.5	477.9	487.1	0.981113							0.0522014	0.0388626	7	0.0759293	0.00777253	4
5416	Kim 2018a	Effect of sodium-glucose cotransporter 2 inhibitor, empagliflozin, and Œ±-glucosidase inhibitor, voglibose, on hepatic steatosis in an animal model of type 2 diabetes	Otsuka Long-Evans Tokushima Fatty (OLETF) rat	Otsuka Long-Evans Tokushima Fatty (OLETF) rat	Long Evans	Long Evans	1	1	0	0	2					M	Kim 2018a_1	Voglibose	0.6	mg/kg	0.6mg/kg	Voglibose	Alpha glucosidase inhibitor	8	12	11	480	600	0.8	19.1475	27.195	0.704082	90	105	0.857143	0.0474558	0.0214342	10	0.103951	0.0142932	5
3357	Raju 2006	Alleviation of hepatic steatosis accompanied by modulation of plasma and liver TNF-alpha levels by Trigonella foenum graecum (fenugreek) seeds in Zucker obese (fa/fa) rats	Zucker	Zucker	Zucker	Zucker	1	1	1	0	3					F	Raju 2006	Trigonella Foenum-graecum Seed Extract			5% w/w diet	Trigonella Foenum-graecum Seed Extract	Trigonella seed extract	1.4	8	3.4	485.7	480.3	1.01124	22.4775	22.2	1.0125	2400	2520	0.952381	0.0981883	0.0060721	8	0.326767	0.0147009	8
571	Chen 2015	Discovery of a Potent 9-Deazaxanthine-Based Agent for the Treatment of Obesity-Related Non-Alcoholic Fatty Liver Disease.	High Fat + High Sucrose	High Fat + High Sucrose	Wistar	Wistar	0	1	0	0	1			10	50	M	Chen 2015	Metformin	150	mg/kg	150 mg/kg	Metformin	Biguanide	2.3	4	3.3	495	525	0.942857	10.21	11.72	0.87116	62.28	69.66	0.894057	1.65	0.05	6	1.85	0.1	6
4306	Meng 2016a	A Recipe Composed of Chinese Herbal Active Components Regulates Hepatic Lipid Metabolism of NAFLD In Vivo and In Vitro	High Fat Diet / HFD	High Fat Diet / HFD	Sprague Dawley	Sprague Dawley	1	1	0	0	2				35	M	Meng 2016a_2	Rosiglitazone	0.6	mg/kg	0.67 mg/kg	Thiazolidinediones (Rosiglitazone)	Thiazolidinediones		4		495.22	588.89	0.840938							0.0440661	0.0067794	9	0.0937817	0.00282475	9	2	0.5	9	2.56	0.53	9	0.33	0.5
5223	Li 2018c	Salidroside and Curcumin Formula Prevents Liver Injury in Nonalcoholic Fatty Liver Disease in Rats	High Fat + High Cholesterol Diet	High Fat + High Cholesterol Diet	Sprague Dawley	Sprague Dawley	0	1	1	0	2	2			22	M	Li 2018c	Rosiglitazone	0.4	mg/kg	0.4 mg/kg/d	Thiazolidinediones (Rosiglitazone)	Thiazolidinediones	3.25	6	4.75	500	580	0.862069	4.5	5.8	0.775862	150	201	0.746269	0.0847425	0.0056495	7	0.124289	0.0045196	7
3637	Suzuki 2014	Tofogliflozin, a sodium/glucose cotransporter 2 inhibitor, attenuates body weight gain and fat accumulation in diabetic and obese animal models	High Fat Diet / HFD	High Fat Diet / HFD	Wistar	Wistar	1	1	0	0	2				60	M	Suzuki 2014	Tofogliflozin			0.0015% (w/w)	Tofogliflozin	SGLT2 inhibitor	3	9	5.25	502	525	0.95619	8.2	8.15	1.00613	247.5	337.5	0.733333	0.0316372	0.00391409	12	0.0621445	0.0234845	12
2519	Haddad 2011	NCX 1000 Alone or in Combination with Vitamin E Reverses Experimental Nonalcoholic Steatohepatitis in the Rat Similarly to UDCA	Lieber-DeCarli high-fat liquid diet	Lieber-DeCarli high-fat liquid diet	Sprague Dawley	Sprague Dawley	1	1	0	0	2					M	Haddad 2011_3	UCDA	17.2	mg/kg	17.2 mg/kg	UCDA	UCDA	2.08007	6	3.58007	505	523	0.965583	5.2	6.6	0.787879	300	825	0.363636							1.2	0.98	10	2.667	0.516	3
4884	Toriniwa 2018	Investigation of pharmacological responses to anti-diabetic drugs in female Spontaneously Diabetic Torii (SDT) fatty rats, a new nonalcoholic steatohepatitis (NASH) model	Spontaneously Diabetic Torri Leprfa rats + high cholesterol	Spontaneously Diabetic Torri Leprfa rats + high cholesterol	SDT	SDT	1	0	0	0	1	2				F	Toriniwa 2018_1	Metformin	300	mg/kg	300mg/kg	Metformin	Biguanide	1	21	6.25	505	495	1.0202	9.99	43.845	0.227848	7	7	1	0.276826	0.090392	6	0.288125	0.101691	3
949	Haddad 2009	Antioxidant and Hepatoprotective Effects of Silibinin in a Rat Model of Nonalcoholic Steatohepatitis	High Fat Diet / HFD	High Fat Diet / HFD	Sprague Dawley	Sprague Dawley	1	1	0	0	2				36	M	Haddad 2009	Silibinin	200	mg/kg	200 mg/kg	Silibinin	Silymarin	0.785616	12	3.78562	510	526	0.969582	6.2	6.5	0.953846	315	780	0.403846							1.25	1.28	8	2.83	0.41	6	1.5	1.07
2158	Zhang 2014	Extracts from Salvia-Nelumbinis naturalis alleviate hepatosteatosis via improving hepatic insulin sensitivity	High calorie diet	High calorie diet	Wistar	Wistar	1	0	0	0	1	2	15		15	M	Zhang 2014_1	Pioglitazone	10	mg/kg	10 mg/kg	Thiazolidinediones (Pioglitazone)	Thiazolidinediones	3.5	4	4.5	510.4	487.1	1.04783	9.6	9.8	0.979592	1248	1357.8	0.919134	0.0543482	0.00269049	7	0.0759293	0.00777253	3
2424	Ji 2011b	Comparison of Dietary Control and Atorvastatin on High Fat Diet Induced Hepatic Steatosis and Hyperlipidemia in Rats	High Fat Diet / HFD	High Fat Diet / HFD	Sprague Dawley	Sprague Dawley	1	1	1	0	3				60	M	Ji 2011b	Atorvastatin	30	mg/kg	30 mg/kg	Statin (Atorvastatin)	Statin	4.5	8	6.5	512.11	542.14	0.944608							0.00285865	0.000734435	8	0.00396595	0.000870023	8
5093	Wu 2018	Chicory (Cichorium intybus L.) polysaccharides attenuate high-fat diet induced non-alcoholic fatty liver disease via AMPK activation	High Fat Diet / HFD	High Fat Diet / HFD	Sprague Dawley	Sprague Dawley	1	1	0	0	2				45	M	Wu 2018	Lovastatin	50	mg/kg	50 mg/kg	Lovastatin	Statin	2.25	8	4.25	528	530	0.996226	8.3	7	1.18571				0.3	0.035	8	0.41	0.05	8
4624	Liu 2017a	miR-192-5p regulates lipid synthesis in non-alcoholic fatty liver disease through SCD-1	High Fat + High Cholesterol Diet	High Fat + High Cholesterol Diet	Sprague Dawley	Sprague Dawley	1	1	0	0	2	2			22	M	Liu 2017a	Liraglutide	0.6	mg/kg	0.6mg/kg	GLP-1 agonist (Liraglutide)	GLP-1 agonist	1.75	8	3.75	530	660	0.80303							0.26	0.0949	10	0.33	0.1265	10
2519	Haddad 2011	NCX 1000 Alone or in Combination with Vitamin E Reverses Experimental Nonalcoholic Steatohepatitis in the Rat Similarly to UDCA	Lieber-DeCarli high-fat liquid diet	Lieber-DeCarli high-fat liquid diet	Sprague Dawley	Sprague Dawley	1	1	0	0	2					M	Haddad 2011_1	NCX 1000 (a derivative of UCDA)	22.5	mg/kg	15, 30 mg/kg	NCX 1000 (a derivative of UCDA)	Bile acid (other)	2.08007	6	3.58007	545.5	523	1.04302	5.375	6.6	0.814394	435	825	0.527273							1.1	1.0275	20	2.667	0.516	3
4485	Ye 2017	Effect of a novel potential probiotic Lactobacillus paracasei Jlus66 isolated from fermented milk on nonalcoholic fatty liver in rats	High Fat Diet / HFD	High Fat Diet / HFD	Wistar	Wistar	1	1	1	0	3				60	M	Ye 2017_1	Lactobacillus paracasei Jlus66			1, 2, 4x10^10 CFU	Lactobacillus paracasei Jlus66	Lactobacillus sp.	2	20	7	548.337	609.37	0.899842													0.43	0.15	24	1.05	0.25	8
5416	Kim 2018a	Effect of sodium-glucose cotransporter 2 inhibitor, empagliflozin, and Œ±-glucosidase inhibitor, voglibose, on hepatic steatosis in an animal model of type 2 diabetes	Otsuka Long-Evans Tokushima Fatty (OLETF) rat	Otsuka Long-Evans Tokushima Fatty (OLETF) rat	Long Evans	Long Evans	1	1	0	0	2					M	Kim 2018a_2	Empagliflozin	10	mg/kg	10mg/kg	Empagliflozin	SGLT2 inhibitor	8	12	11	550	600	0.916667	18.87	27.195	0.693878	94.5	105	0.9	0.0384166	0.0178637	10	0.103951	0.0142932	5
349	Zhou 2015	Beneficial effects of neomangiferin on high fat diet-induced nonalcoholic fatty liver disease in rats	High Fat Diet / HFD	High Fat Diet / HFD	Sprague Dawley	Sprague Dawley	1	1	0	0	2				36	M	Zhou 2015_2	Fenofibrate	5	mg/kg	5 mg/kg/day	Fibrate (Fenofibrate)	Fibrates	1.2	13	4.45	556.4	622.65	0.8936	6	7.5	0.8				0.18	0.05	6	0.38	0.15	6
5162	Tiao 2018	Resveratrol ameliorates maternal and post-weaning high-fat diet-induced nonalcoholic fatty liver disease via renin-angiotensin system	Maternal HFD + offspring HFD	Maternal HFD + offspring HFD	Sprague Dawley	Sprague Dawley	1	1	0	0	2				58	M	Tiao 2018	Resveratrol	50	mg/kg	50mg/kg	Polyphenol (Resveratrol)	Polyphenol (Resveratrol)	0.75	14.5	4.375	558.89	714.64	0.782058							0.440661	0.0745734	11	0.666641	0.393205	11
3039	Tatsumi 2011	Effect of anti-oxidants, Ricetrienol and a-tocopherol, on adipocytokine abnormalitiesand fatty liver in Otsuka Long-Evans Tokushima Fatty diabetic rats	Otsuka Long-Evans Tokushima Fatty (OLETF) rat + High Sucrose diet	Otsuka Long-Evans Tokushima Fatty (OLETF) rat + High Sucrose diet	Long Evans	Long Evans	1	1	1	0	3					M	Tatsumi 2011	alpha-tocopherol	0.05	%	0.0005	Vitamin E	Vitamin E	4.25	12	7.25	576	560	1.02857	17.9265	18.9255	0.947214	24.06	28.92	0.83195	0.13	0.0175	6	0.137	0.0234	6	1.28	0.2607	6	1.17	0.395	6
157	Kim 2017	Prevention and Treatment Effect of Evogliptin on Hepatic Steatosis in High-Fat-Fed Animal Models.	High Fat Diet / HFD	High Fat Diet / HFD	Wistar	Wistar	1	1	1	0	3				60	M	Kim 2017_2	Evogliptin	10	mg/kg	10 mg/kg	Evogliptin	DPP4 inhibitor	7.2	14	10.7	580	630	0.920635							0.0508455	0.0214383	10	0.079093	0.0107192	10
3606	Zhang 2013b	Pioglitazone upregulates hepatic angiotensin converting enzyme 2 expression in rats with steatohepatitis	High Fat + High Cholesterol Diet	High Fat + High Cholesterol Diet	Sprague Dawley	Sprague Dawley	1	1	1	0	3	2			46	M	Zhang 2013b	Pioglitazone	10	mg/kg	10 mg/kg	Thiazolidinediones (Pioglitazone)	Thiazolidinediones	0.921394	24	6.92139	584	643	0.908243	9.82	11.82	0.830795	86.04	129.72	0.663275							1.4	0.5	10	2.9	0.2	10	1	0.3
5268	Shen 2018b	Sitagliptin reduces insulin resistance and improves rat liver steatosis via the SIRT1/AMPKŒ± pathway	High Fat Diet / HFD	High Fat Diet / HFD	Sprague Dawley	Sprague Dawley	1	1	1	0	3				45	M	Shen 2018b	Sitagliptin	100	mg/kg	100mg/kg	DPP4 inhibitor (Sitagliptin)	DPP4 inhibitor	4.5	8	6.5	593.2	608.9	0.974216	6.92	7.12	0.97191	171.66	200.1	0.857871							1.1	0.45	10	3	0.45	10	0.65	0.32
4555	Shin 2017	Flos Lonicera Combined with Metformin Ameliorates Hepatosteatosis and Glucose Intolerance in Association with Gut Microbiota Modulation	Otsuka Long-Evans Tokushima Fatty (OLETF) rat	Otsuka Long-Evans Tokushima Fatty (OLETF) rat	Long Evans	Long Evans	1	1	0	0	2					M	Shin 2017	Metformin	100	mg/kg	100mg/kg	Metformin	Biguanide	3	12	6	595	610	0.97541	10.545	11.9325	0.883721	31.5	75	0.42	0.0384166	0.0090392	7	0.0587548	0.0045196	7
206	Feillet-Coudray 2014	The Mitochondrial-Targeted Antioxidant Mitoq Ameliorates Metabolic Syndrome Features in Obesogenic Diet-Fed Rats Better Than Apocynin or Allopurinol.	High Fat Diet / HFD	High Fat Diet / HFD	Sprague Dawley	Sprague Dawley	1	1	0	0	2				55	M	Feillet-Coudray 2014	Mitoquinone mesylate			375 μmoles/kg diet	Mitoquinone mesylate	Anti-oxidant (other)	1.4	8	3.4	597	632	0.94462	8.99	8.66	1.03811	577.5	966	0.597826	0.147	0.021	8	0.142	0.028	8
5362	Chang 2018	CB1 receptor blockade ameliorates hepatic fat infiltration and inflammation and increases Nrf2-AMPK pathway in a rat model of severely uncontrolled diabetes	Otsuka Long-Evans Tokushima Fatty (OLETF) rat	Otsuka Long-Evans Tokushima Fatty (OLETF) rat	Long Evans	Long Evans	1	0	1	0	2						Chang 2018	Rimonabant	10	mg/kg	10mg/kg	Rimonabant	CB1 antagonist (Rimonabant)	8	6	9.5	602	600	1.00333	18	16	1.125										0.2	0.447214	5	0.6	0.67082	5	0.2	0.402492
4790	Chen 2018b	Sugary Kefir Strain Lactobacillus mali APS1 Ameliorated Hepatic Steatosis by Regulation of SIRT-1/Nrf-2 and Gut Microbiota in Rats	High Fat Diet / HFD	High Fat Diet / HFD	Sprague Dawley	Sprague Dawley	1	1	0	0	2				60	M	Chen 2018b	Lactobacillus mali APS1			5x10^8 CFU	Lactobacillus mali APS1	Lactobacillus sp.	1.5	12	4.5	610	667.5	0.913858	8.4471	11.9547	0.706592	345	450	0.766667	0.000519754	0.000273436	12	0.000937817	0.000703928	12
4287	Lee 2012b	Peroxisome proliferator-activated receptor δ agonist attenuates hepatic steatosis by anti-inflammatory mechanism	Otsuka Long-Evans Tokushima Fatty (OLETF) rat	Otsuka Long-Evans Tokushima Fatty (OLETF) rat	Long Evans	Long Evans	1	0	0	0	1					M	Lee 2012b	GW0742	10	mg/kg	10 mg/kg	GW0742	PPARalpha-delta agonist	6.5	10	9	616.37	627	0.983046	5.883	6.8265	0.861789				0.00960415	0.0011299	9	0.0141237	0.00847425	9
1739	Zhu 2017a	Active form of vitamin D ameliorates non-alcoholic fatty liver disease by alleviating oxidative stress in a high-fat diet rat model	High Fat + High Cholesterol Diet	High Fat + High Cholesterol Diet	Sprague Dawley	Sprague Dawley	1	1	1	0	3	2			40	M	Zhu 2017a	Vitamin D3	5000	ng/kg	5000 ng/kg body weight	Vitamin D	Vitamin D	3	16	7	620	680	0.911765							0.017	0.0015	13	0.023	0.001	13	1	0.62	13	1.75	0.93	13	0.9	0.6
2092	Linden 2015	Combining metformin therapy with caloric restriction for the management of type 2 diabetes and nonalcoholic fatty liver disease in obese rats	Otsuka Long-Evans Tokushima Fatty (OLETF) rat	Otsuka Long-Evans Tokushima Fatty (OLETF) rat	Long Evans	Long Evans	1	1	0	0	2					M	Linden 2015	Metformin	300	mg/kg	300 mg/kg/day	Metformin	Biguanide	5	12	8	620	640	0.96875	14.985	13.875	1.08	1500	720	2.08333	4.8e-06	1.58e-06	7	7.2e-06	1.58e-06	7
3614	Yang 2011a	Activation of Peroxisome Proliferator-Activated Receptor Gamma by Rosiglitazone Increases Sirt6 Expression and Ameliorates Hepatic Steatosis in Rats	Otsuka Long-Evans Tokushima Fatty (OLETF) rat	Otsuka Long-Evans Tokushima Fatty (OLETF) rat	Long Evans	Long Evans	1	0	0	0	1					M	Yang 2011a	Rosiglitazone	4	mg/kg	4 mg/kg/day	Thiazolidinediones (Rosiglitazone)	Thiazolidinediones	8	6	9.5	635	530	1.19811	7.8	10.3	0.757282	190	480	0.395833	0.0248578	0.00479376	5	0.0836126	0.0479376	5	0.1	0.1	5	0.6	0.636396	5	0.15	0.318198
3133	Chang 2015	Ezetimibe improves hepatic steatosis in relation to autophagy in obese and diabetic rats	Otsuka Long-Evans Tokushima Fatty (OLETF) rat	Otsuka Long-Evans Tokushima Fatty (OLETF) rat	Long Evans	Long Evans	1	1	1	0	3					M	Chang 2015	Ezetimibe	10	mg/kg	10 mg/kg/day	Ezetimibe	Cholesterol Absorption Inhibitor	3	20	8	642.29	617.67	1.03986	7.25	10.23	0.7087	43.5	123	0.353659	0.00666	0.00247398	6	0.02272	0.00270564	5	0.296296	0.408248	6	0.796296	0.455495	5	1.14815	0.317526
5275	Li 2018b	Rosiglitazone Elicits an Adiponectin-Mediated Insulin-Sensitizing Action at the Adipose Tissue-Liver Axis in Otsuka Long-Evans Tokushima Fatty Rats	Otsuka Long-Evans Tokushima Fatty (OLETF) rat	Otsuka Long-Evans Tokushima Fatty (OLETF) rat	Long Evans	Long Evans	1	1	0	0	2					M	Li 2018b	Rosiglitazone	3	mg/kg	3mg/kg	Thiazolidinediones (Rosiglitazone)	Thiazolidinediones	2	32	10	650	630	1.03175	6.2	6.7	0.925373	12.9	20.4	0.632353	0.0158186	0.00479078	8	0.0468909	0.00319762	8
2004	Linden 2014	Combining metformin and aerobic exercise training in the treatment of type 2 diabetes and NAFLD in OLETF rats	Otsuka Long-Evans Tokushima Fatty (OLETF) rat	Otsuka Long-Evans Tokushima Fatty (OLETF) rat	Long Evans	Long Evans	1	1	0	0	2					M	Linden 2014	Metformin	300	mg/kg	150 mg/kg/day the 1st week and 300 mg/kg/day thereafter, in the drinking water	Metformin	Biguanide	5	12	8	655	685	0.956204	14.9239	16.539	0.902349	1062	1069.5	0.992987	4.07407e-06	2.57667e-06	10	5.85185e-06	1.87394e-06	10
4493	Zhao 2018a	Curcumin suppresses Notch-1 signaling: Improvements in fatty liver and insulin resistance in rats	High Fat Diet / HFD	High Fat Diet / HFD	Sprague Dawley	Sprague Dawley	0	1	0	0	1				44	M	Zhao 2018a_1	Curcumin	150	mg/kg	100, 200mg/kg	Curcumin	Curcumin	1.75	8	3.75	669.9	695.1	0.963746	4.5	4.5	1				0.023163	0.0022598	20	0.0350269	0.0033897	10
1551	Fatani 2011	The effects of diet-induced obesity on hepatocyte insulin signaling pathways and induction of non-alcoholic liver damage	High calorie diet	High calorie diet	Wistar	Wistar	1	1	1	0	3				16	M	Fatani 2011	Fenofibrate	50	mg/kg	50 mg/kg/day	Fibrate (Fenofibrate)	Fibrates		7		699	589	1.18676	10.5	13.8	0.76087	180	555	0.324324	0.0764027	0.0238216	10	0.149576	0.0408365	10
4884	Toriniwa 2018	Investigation of pharmacological responses to anti-diabetic drugs in female Spontaneously Diabetic Torii (SDT) fatty rats, a new nonalcoholic steatohepatitis (NASH) model	Spontaneously Diabetic Torri Leprfa rats + high cholesterol	Spontaneously Diabetic Torri Leprfa rats + high cholesterol	SDT	SDT	1	0	0	0	1	2				F	Toriniwa 2018_2	Pioglitazone	10	mg/kg	10mg/kg	Thiazolidinediones (Pioglitazone)	Thiazolidinediones	1	21	6.25	800	495	1.61616	19.98	43.845	0.455696	5	7	0.714286	0.090392	0.022598	6	0.288125	0.101691	3
5099	Yang 2018b	Metabolomic and lipidomic analysis of the effect of pioglitazone on hepatic steatosis in a rat model of obese Type 2 diabetes	Otsuka Long-Evans Tokushima Fatty (OLETF) rat + HFD	Otsuka Long-Evans Tokushima Fatty (OLETF) rat + HFD	Long Evans	Long Evans	1	1	1	0	3				60	M	Yang 2018b	Pioglitazone	30	mg/kg	30mg/kg	Thiazolidinediones (Pioglitazone)	Thiazolidinediones	1.75	8	3.75	828.6	715.9	1.15742	5.1	6.2	0.822581	344.5	288	1.19618	0.0954	0.0359	8	0.1278	0.0191	10
13	Koppe 2004	Pentoxifylline attenuates steatohepatitis induced by the methionine choline deficient diet	Methionine and choline deficient diet / MCD	Methionine and choline deficient diet / MCD	C57BL/6J	C57BL/6J	1	0	1	0	2					Both	Koppe 2004	Pentoxifylline	0.3	mg/kg	0.3 mg/kg	PDE inhibitor (Pentoxifylline)	PDE inhibitor (Pentoxifylline)	2.25	2	2.75										0.000609016	0.000246578	12	0.000404504	0.000130074	6							0.1	0.1
3252	Assy 2006	Effect of insulin-sensitizing agents in combination with ezetimibe, and valsartan in rats with non-alcoholic fatty liver disease	Methionine and choline deficient diet / MCD	Methionine and choline deficient diet / MCD	Sprague Dawley	Sprague Dawley	1	1	1	0	3					M	Assy 2006_1	Metformin	200	mg/kg	200 mg/kg	Metformin	Biguanide	1.80395	6	3.30395										0.0148	0.0016	6	0.0246	0.0011	2							0.6	0.1
3252	Assy 2006	Effect of insulin-sensitizing agents in combination with ezetimibe, and valsartan in rats with non-alcoholic fatty liver disease	Methionine and choline deficient diet / MCD	Methionine and choline deficient diet / MCD	Sprague Dawley	Sprague Dawley	1	1	1	0	3					M	Assy 2006_2	Ezetimibe	2	mg/kg	2mg/kg	Ezetimibe	Cholesterol Absorption Inhibitor	1.80395	6	3.30395										0.0114	0.0016	6	0.0246	0.0011	2							0.7	0.1
3252	Assy 2006	Effect of insulin-sensitizing agents in combination with ezetimibe, and valsartan in rats with non-alcoholic fatty liver disease	Methionine and choline deficient diet / MCD	Methionine and choline deficient diet / MCD	Sprague Dawley	Sprague Dawley	1	1	1	0	3					M	Assy 2006_3	Rosiglitazone	3	mg/kg	3 mg/kg	Thiazolidinediones (Rosiglitazone)	Thiazolidinediones	1.80395	6	3.30395										0.0112	0.0016	6	0.0246	0.0011	2							0.7	0.1
1	Gupte 2010	Rosiglitazone attenuates age- and diet-associated nonalcoholic steatohepatitis in male low-density lipoprotein receptor knockout mice.	LDL-receptor knockout (LDL-/-) + HFD	LDL-receptor knockout (LDL-/-) + HFD	C57BL/6J	C57BL/6J	1	1	0	0	2					M	Gupte 2010_1	Rosiglitazone			1200 mg/kg diet	Thiazolidinediones (Rosiglitazone)	Thiazolidinediones	3	12	6																						0.3	0.25
1840	Ishii 2009	Eicosapentaenoic acid ameliorates steatohepatitis and hepatocellular carcinoma in hepatocyte-specifict Pten-deficient mice	Liver specific PTEN KO	Liver specific PTEN KO	C57BL/6J	C57BL/6J	1	1	1	0	3					Both	Ishii 2009	Eicosapentaenoic acid	5	%	0.05	Eicosapentaenoic acid	Eicosapentaenoic acid	3	40	13										0.022598	0.011299	4	0.10734	0.045196	4	1.86	0.53	8	2.86	0.16	8	0.38	0.3
311	Cho 2014	Tauroursodeoxycholic Acid Attenuates Progression of Steatohepatitis in Mice Fed a Methionine-Choline-Deficient Diet	Methionine and choline deficient diet / MCD	Methionine and choline deficient diet / MCD	C57BL/6?	C57BL/6?	1	1	0	0	2					M	Cho 2014_2	Tauroursodeoxycholic acid (TUDCA)	2333.33	mg/kg	1000, 2000, 4000mg/day	Tauroursodeoxycholic acid (TUDCA)	Tauroursodeoxycholic acid (TUDCA)	3	4	4				5.069	4.8618	1.04262				0.0371737	0.0311476	30	0.0418063	0.0289254	10	2.63333	0.633333	30	3	0.1	10	1.26667	0.37
311	Cho 2014	Tauroursodeoxycholic Acid Attenuates Progression of Steatohepatitis in Mice Fed a Methionine-Choline-Deficient Diet	Methionine and choline deficient diet / MCD	Methionine and choline deficient diet / MCD	C57BL/6?	C57BL/6?	1	1	0	0	2					M	Cho 2014_1	Tauroursodeoxycholic acid (TUDCA)	2333.33	mg/kg	1000, 2000, 4000mg/day	Tauroursodeoxycholic acid (TUDCA)	Tauroursodeoxycholic acid (TUDCA)	2	8	4				4.58985	4.84515	0.947308				0.0454596	0.0198862	30	0.0477948	0.0157056	10	2.46667	0.946667	30	3	0.1	10	1.4	0.32
4437	Phung 2009	Pro-oxidant-mediated hepatic fibrosis and effects of antioxidant intervention in murine dietary steatohepatitis	Methionine and choline deficient diet / MCD	Methionine and choline deficient diet / MCD	C57BL/6?	C57BL/6?	1	0	1	0	2					M	Phung 2009	Vitamin E			250 mg/kg	Vitamin E	Vitamin E	1	10	3.5																1.5	0.53	8	2.29	0.75	8	1.25	0.46
3872	Pathil 2011	Ursodeoxycholyl Lysophosphatidylethanolamide Improves Steatosis and Inflammation in Murine Models of Nonalcoholic Fatty Liver Disease	High Fat Diet / HFD	High Fat Diet / HFD	C57BL/6?	C57BL/6?	1	0	1	0	2				60	M	Pathil 2011_1	UDCA-LPE	12.9	mg/kg	12.9 mg/kg	UCDA	UCDA	7	4	8										0.350269	0.147972	14	0.621445	0.0845504	14	1.6	0.37	14	2.8	0.37	14	0.4	0.37
1338	Zhang 2009b	Farnesoid X receptor agonist WAY-362450 attenuates liver inflammation and fibrosis in murine model of non-alcoholic steatohepatitis	Methionine and choline deficient diet / MCD	Methionine and choline deficient diet / MCD	C57BL/6?	C57BL/6?	1	0	1	0	2					M	Zhang 2009b	WAY-362450	30	mg/kg	30 mg/kg/day	WAY-362450	FXR agonist	2.25	4	3.25										0.115	0.031	15	0.119	0.043	15							0.9	0.141
4103	Magdy 2017	Potential Involvement of Jnk1 Repression in the Hepatic Effect of Sitagliptin and Metformin in Rats Subjected to High Fat Diet and Chronic Mild Distress	High Fat + High Cholesterol Diet	High Fat + High Cholesterol Diet	Wistar	Wistar	1	0	0	0	1	2			47	M	Magdy 2017_3	Metformin	30	mg/kg	30 mg/kg	Metformin	Biguanide	1.31462	12	4.31462				6.75435	10.1454	0.665755	70.62	72.9	0.968724							0.5	0.3	12	2	0.3	6	0.1	0.3
4103	Magdy 2017	Potential Involvement of Jnk1 Repression in the Hepatic Effect of Sitagliptin and Metformin in Rats Subjected to High Fat Diet and Chronic Mild Distress	High Fat + High Cholesterol Diet	High Fat + High Cholesterol Diet	Wistar	Wistar	1	0	0	0	1	2			47	M	Magdy 2017_4	Sitagliptin	30	mg/kg	30 mg/kg	DPP4 inhibitor (Sitagliptin)	DPP4 inhibitor	1.31462	12	4.31462				6.90975	10.1454	0.681072	103.38	72.9	1.41811							0.5	0.3	12	2	0.3	6	0.1	0.3
5295	Toppo 2017	Effect of two andrographolide derivatives on cellular and rodent models of non-alcoholic fatty liver disease	High Fat Diet / HFD	High Fat Diet / HFD	Wistar	Wistar	1	1	0	0	2				40	M	Toppo 2017	Fenofibrate	50	mg/kg	50mg/kg	Fibrate (Fenofibrate)	Fibrates	3.75	4	4.75																0.4	0.7	6	2.4	0.3	6	1	0.4
4103	Magdy 2017	Potential Involvement of Jnk1 Repression in the Hepatic Effect of Sitagliptin and Metformin in Rats Subjected to High Fat Diet and Chronic Mild Distress	Chronic stress + HFD + cholesterol	Chronic stress + HFD + cholesterol	Wistar	Wistar	1	0	0	0	1	2			47	M	Magdy 2017_2	Sitagliptin	30	mg/kg	30 mg/kg	DPP4 inhibitor (Sitagliptin)	DPP4 inhibitor	1.31462	12	4.31462				8.547	16.7998	0.508755	133.02	243.18	0.547002							1	0.6	12	2.5	0.3	6	1	0.3
4103	Magdy 2017	Potential Involvement of Jnk1 Repression in the Hepatic Effect of Sitagliptin and Metformin in Rats Subjected to High Fat Diet and Chronic Mild Distress	Chronic stress + HFD + cholesterol	Chronic stress + HFD + cholesterol	Wistar	Wistar	1	0	0	0	1	2			47	M	Magdy 2017_1	Metformin	30	mg/kg	30 mg/kg	Metformin	Biguanide	1.31462	12	4.31462				9.95115	16.7998	0.592336	118.68	243.18	0.488034							1	0.6	12	2.5	0.3	6	2	0.6
677	Anstee 2010	Impact of Pan-Caspase Inhibition in Animal Models of Established Steatosis and Non-Alcoholic Steatohepatitis.	High Fat Diet / HFD	High Fat Diet / HFD	C3H/HeN	Mixed	1	1	0	0	2				45	M	Anstee 2010_1	VX-166 (Pan-caspase inhibitor)	2	mg/kg	2mg/kg	Pan-caspase inhibitor (VX-166)	Caspase inhibitor	4.5	5	5.75																1.6	0.52	10	1.7	0.48	10	0.4	0.52
1580	Kurita 2008	Olmesartan ameliorates a dietary rat model of non-alcoholic steatohepatitis through its pleiotropic effects	Otsuka Long-Evans Tokushima Fatty (OLETF) rat + MCD	Otsuka Long-Evans Tokushima Fatty (OLETF) rat + MCD	Long Evans	Long Evans	1	0	1	0	2					M	Kurita 2008_2	Olmesartan			0.0001	ARB (Olmesartan)	Angiotensin Receptor Blocker	6	8	8										0.067794	0.0126323	5	0.152536	0.0169485	5							1.4	0.45
5192	Zarzour 2017	Phyllanthus Niruri Standardized Extract Alleviates the Progression of Non-Alcoholic Fatty Liver Disease and Decreases Atherosclerotic Risk in Sprague–Dawley Rats	High Fat + High Cholesterol Diet	High Fat + High Cholesterol Diet	Sprague Dawley	Sprague Dawley	1	1	1	0	3	1			40	M	Zarzour 2017	Metformin	500	mg/kg	500mg/kg	Metformin	Biguanide	3.75	4	4.75				4.6	6	0.766667	9.6	27.6	0.347826	0.0485857	0.00553651	6	0.0531053	0.00276826	6	1.5	0.83	6	3	0.1	6	0.67	0.56
1408	Karahan 2011	Effects of probiotics on methionine choline deficient diet-induced steatohepatitis in rats	Methionine and choline deficient diet / MCD	Methionine and choline deficient diet / MCD	Wistar	Wistar	1	0	0	0	1					M	Karahan 2011_1	Probiotics			0.6, 1.3*10^(10) cfu/ml	Probiotics	Probiotic (mix)		2																	0.59	0.39	12	1.16	0.44	6	0.42	0.535
1	Gupte 2010	Rosiglitazone attenuates age- and diet-associated nonalcoholic steatohepatitis in male low-density lipoprotein receptor knockout mice.	LDL-receptor knockout (LDL-/-) + HFD	LDL-receptor knockout (LDL-/-) + HFD	C57BL/6J	C57BL/6J	1	1	0	0	2					M	Gupte 2010_2	Rosiglitazone			1200 mg/kg diet	Thiazolidinediones (Rosiglitazone)	Thiazolidinediones	12	12	15																						2	0.97
677	Anstee 2010	Impact of Pan-Caspase Inhibition in Animal Models of Established Steatosis and Non-Alcoholic Steatohepatitis.	Leptin Receptor Deficiency (db/db) + MCD	Leptin Receptor Deficiency (db/db) + MCD	BKS.Cg-m+/+ Leprdb/J	Mixed	1	1	0	0	2					M	Anstee 2010_2	VX-166 (Pan-caspase inhibitor)	2	mg/kg	2mg/kg	Pan-caspase inhibitor (VX-166)	Caspase inhibitor	3.25	2.5	3.875																1.86	0.38	7	2.43	0.53	7	1	0.58
5417	Nishina 2018	Dipeptidyl Peptidase 4 Inhibitors Reduce Hepatocellular Carcinoma by Activating Lymphocyte Chemotaxis in Mice	HFD + STZ	HFD + STZ	C57BL/6J	C57BL/6J	0	1	0	0	1				60	M	Nishina 2018	Sitagliptin	20	mg/kg	30mg/kg	DPP4 inhibitor (Sitagliptin)	DPP4 inhibitor	2	10	4.5				20.2797	24.1647	0.839228	30	25.5	1.17647							1.6	0.5	5	2.4	0.9	5	1	0.1
1365	Zhang 2009a	Angiotensin-converting enzyme inhiibtors improve hepatic steatosis by modulating expression of tumour necrosis factor-a, interleukin-6 and adiponetin receptor-2 in rats with type 2 diabetes	High Fat + High Cholesterol Diet + STZ	High Fat + High Cholesterol Diet + STZ	Wistar	Wistar	1	1	1	0	3	1		13	60	M	Zhang 2009a	Fosinopril	5	mg/kg	5 mg/kg/day	Fosinopril	ACE inhibitor	2.47773	6	3.97773				9.3	11.3	0.823009	131.4	280.2	0.468951							1.5	0.1	12	3	0.1	12	2	0.5
4640	Kobyliak 2018	Efficacy of Probiotics and Smectite in Rats with Non-Alcoholic Fatty Liver Disease	MSG (L-monosodium glutamate) injection	MSG (L-monosodium glutamate) injection	Wistar	Wistar	1	0	1	0	2					M	Kobyliak 2018	Symbiter			2.5 mL/kg	Symbiter	Probiotic (mix)	1	3	16																0.93	0.695701	10	2.13	0.600833	10	0.33	0.474342
2174	Baumgardner 2008	N-Acetylcysteine Attenuates Progression of Liver Pathology in a Rat Model of Nonalcoholic Steatohepatitis	High Fat Diet / HFD	High Fat Diet / HFD	Sprague Dawley	Sprague Dawley	1	1	1	0	3				70	M	Baumgardner 2008	N-acetylcysteine	2000	mg/kg	2000 mg/kg/day	N-acetylcysteine	N-acetylcysteine	1.29478	8	3.29478										0.0181	0.00480833	8	0.0181	0.0084664	7							1.1	0.2
1408	Karahan 2011	Effects of probiotics on methionine choline deficient diet-induced steatohepatitis in rats	Methionine and choline deficient diet / MCD	Methionine and choline deficient diet / MCD	Wistar	Wistar	1	0	0	0	1					M	Karahan 2011_2	Probiotics			0.6*10^(10) cfu/ml	Probiotics	Probiotic (mix)		6																	0.7	0.73	6	1.5	0.73	6	0.7	0.73
4436	Larter 2008b	Activation of peroxisome proliferator-activated receptor alpha by dietary fish oil attenuates steatosis, but does not prevent experimental steatohepatitis because of hepatic lipoperoxide accumulation	Methionine and choline deficient diet / MCD	Methionine and choline deficient diet / MCD	C57BL/6J	C57BL/6J	1	0	1	0	2					F	Larter 2008b	Docosahexaenoic acid	26	%	0.26	Docosahexaenoic acid	Docosahexaenoic acid	1	4	2										0.621445	0.095872	8	0.960415	0.127679	8	0.8	2.5	8	1.4	0.8	8	1.5	1.41
3926	McMahan 2013	Bile Acid Receptor Activation Modulates Hepatic Monocyte Activity and Improves Nonalcoholic Fatty Liver Disease	Leptin Receptor Deficiency (db/db)	Leptin Receptor Deficiency (db/db)	Not stated	Not stated	1	0	1	0	2					M	McMahan 2013	INT-767	30	mg/kg	30 mg/kg	FXR/TGR5 agonist (INT-767)	FXR agonist	3	6	4.5																0.7	0.9	15	1.8	0.77	15	0.6	0.77
786	Kawai 2012b	Hydrogen-Rich Water Prevents Progression of Nonalcoholic Steatohepatitis and Accompanying Hepatocarcinogenesis in Mice	Methionine and choline deficient diet / MCD	Methionine and choline deficient diet / MCD	C57BL/6?	C57BL/6?	1	0	1	0	2					M	Kawai 2012b_2	Pioglitazone	0.01	%	0.0001	Thiazolidinediones (Pioglitazone)	Thiazolidinediones	2	8	4										0.0881322	0.0203382	8	0.11073	0.022598	8	1.5	0.7	8	2.1	0.8	8	1.4	0.8
911	Han 2015	A role of 1,25(OH)2D3 supplementation in rats with nonalcoholic steatohepatitis induced by choline-deficient diet	Choline deficient diet	Choline deficient diet	Wistar	Wistar	0	1	1	0	2					M	Han 2015_1	1,25(OH)2D3 (1,25-VD3)	5333.33	ng/kg	5000, 1000, 10000 ng/kg	Vitamin D	Vitamin D	2	12	5																2.73333	0.216667	15	3	0.1	5	2.06667	0.533333
4115	Kobyliak 2017	Probiotics Supplemented with Omega-3 Fatty Acids Are More Effective for Hepatic Steatosis Reduction in an Animal Model of Obesity	MSG (L-monosodium glutamate) injection	MSG (L-monosodium glutamate) injection	Wistar	Wistar	1	0	1	0	2					M	Kobyliak 2017_1	Probiotics			2.5 ml/kg	Probiotics	Probiotic (mix)	4	14	7.5										0.00734435	0.0109374	15	0.00847425	0.0109374	15	0.93	0.85	15	2.13	0.74	15	0.33	0.58
1676	Soon 2010	Stress Signaling in the Methionine-Choline-Deficient Model of Murine Fatty Liver Disease	Methionine and choline deficient diet / MCD	Methionine and choline deficient diet / MCD	C3H	C3H	1	0	1	0	2					M	Soon 2010	Clofibrate	0.5	%	0.5% weight in food	Clofibrate	Fibrates	1	2	1.5				7.33155	9.55155	0.767577				0.0248578	0.0067794	10	0.11525	0.0079093	10	0.1	0.1	10	2.2	1.11	10	0.95	0.63
5455	Jahn 2019	Beneficial Effects of Vitamin D Treatment in an Obese Mouse Model of Non-Alcoholic Steatohepatitis	High fat, high sugar diet + fructose	High fat, high sugar diet + fructose	C57BL/6J	C57BL/6J	0	0	1	0	1		23.1		59	M	Jahn 2019_1	Vitamin D3			10,000 IU	Vitamin D	Vitamin D	2	16	6				7.5	7.5	1										0.8	0.918937	10	1.8	1.0328	10	0.5	0.527046
5455	Jahn 2019	Beneficial Effects of Vitamin D Treatment in an Obese Mouse Model of Non-Alcoholic Steatohepatitis	High fat, high sugar diet + fructose	High fat, high sugar diet + fructose	C57BL/6J	C57BL/6J	0	0	1	0	1		23.1		59	M	Jahn 2019_2	Vitamin D3			10,000 IU	Vitamin D	Vitamin D	5	4	6				8.1	7.5	1.08										1.2	1.39841	10	1.8	1.0328	10	0.7	0.823273
2507	Liu 2012	Fosinopril improves liver fibrosis by upregulating ACE2/ageniotin-(1-7) axis activation in rats with nonalcholic steatohepatitis	High Fat Diet / HFD	High Fat Diet / HFD	Sprague Dawley	Sprague Dawley	1	0	0	0	1				42	M	Liu 2012	Fosinopril	3.6	mg/kg	3.6 mg/kg	Fosinopril	ACE inhibitor	0.989282	24	6.98928																1.4	0.52	10	2.85	0.24	10	1.2	0.26
3328	Kobyliak 2016	Comparative experimental investigations on the efficacy of mono- and multiprobiotic strains in non-alcoholic fatty liver disease prevention	MSG (L-monosodium glutamate) injection	MSG (L-monosodium glutamate) injection	Wistar	Wistar	1	0	1	0	2					M	Kobyliak 2016_1	Symbiter			Various	Symbiter	Probiotic (mix)	1	12	4																0.7	0.47	10	2.3	0.66	2	0.1	0.32
3328	Kobyliak 2016	Comparative experimental investigations on the efficacy of mono- and multiprobiotic strains in non-alcoholic fatty liver disease prevention	MSG (L-monosodium glutamate) injection	MSG (L-monosodium glutamate) injection	Wistar	Wistar	1	0	1	0	2					M	Kobyliak 2016_5	Poliprobiotics			Various	Poliprobiotics	Probiotic (mix)	1	12	4																1.3	0.95	10	2.3	0.66	2	0.3	0.47
3328	Kobyliak 2016	Comparative experimental investigations on the efficacy of mono- and multiprobiotic strains in non-alcoholic fatty liver disease prevention	MSG (L-monosodium glutamate) injection	MSG (L-monosodium glutamate) injection	Wistar	Wistar	1	0	1	0	2					M	Kobyliak 2016_3	B. animalis VKB			Various	B. animalis VKB	Bifidobacterium sp.	1	12	4																1.7	0.66	10	2.3	0.66	2	0.4	0.51
3328	Kobyliak 2016	Comparative experimental investigations on the efficacy of mono- and multiprobiotic strains in non-alcoholic fatty liver disease prevention	MSG (L-monosodium glutamate) injection	MSG (L-monosodium glutamate) injection	Wistar	Wistar	1	0	1	0	2					M	Kobyliak 2016_2	L.casei IMVB-7280			Various	L.casei IMVB-7280	Lactobacillus sp.	1	12	4																1.8	0.63	10	2.3	0.66	2	0.4	0.51
3328	Kobyliak 2016	Comparative experimental investigations on the efficacy of mono- and multiprobiotic strains in non-alcoholic fatty liver disease prevention	MSG (L-monosodium glutamate) injection	MSG (L-monosodium glutamate) injection	Wistar	Wistar	1	0	1	0	2					M	Kobyliak 2016_4	B. animalis VKL			Various	B. animalis VKL	Bifidobacterium sp.	1	12	4																2	0.79	10	2.3	0.66	2	0.6	0.51
1081	Kondro 2014	Multiprobiotic therapy from childhood prevents the development of nonalcoholic fatty liver disease in adult monosodium glutamate-induced obese rats	MSG (L-monosodium glutamate) injection	MSG (L-monosodium glutamate) injection	Wistar	Wistar	1	0	0	0	1						Kondro 2014	Probiotics			140mg/kg	Probiotics	Probiotic (mix)	1	12	4																0.85	0.581	20	2.15	0.716	20	0.1	0.268
786	Kawai 2012b	Hydrogen-Rich Water Prevents Progression of Nonalcoholic Steatohepatitis and Accompanying Hepatocarcinogenesis in Mice	HFD + STZ	HFD + STZ	C57BL/6?	C57BL/6?	1	0	1	0	2				60	M	Kawai 2012b_1	Pioglitazone	0.01	%	0.0001	Thiazolidinediones (Pioglitazone)	Thiazolidinediones	2	8	4				27.75	28.86	0.961538	60	45	1.33333							1.3	0.8	8	1.2	0.6	8	0.7	0.5
3872	Pathil 2011	Ursodeoxycholyl Lysophosphatidylethanolamide Improves Steatosis and Inflammation in Murine Models of Nonalcoholic Fatty Liver Disease	Methionine and choline deficient diet / MCD	Methionine and choline deficient diet / MCD	C57BL/6?	C57BL/6?	1	0	1	0	2					M	Pathil 2011_3	UDCA-LPE	12.9	mg/kg	12.9 mg/kg	UCDA	UCDA	2.25	2.5	2.875										0.576249	0.0479417	8	0.768332	0.0798952	8	2.1	0.7	8	2.3	0.56	8	1.2	0.75
3131	Seo 2008	PPAR agonists treatment is effective in a nonalcoholic fattyliver disease animal model by modulating fatty-acidmetabolic enzymes	Otsuka Long-Evans Tokushima Fatty (OLETF) rat	Otsuka Long-Evans Tokushima Fatty (OLETF) rat	Long Evans	Long Evans	1	0	1	0	2					M	Seo 2008_2	Rosiglitazone	4	mg/kg	4 mg/kg	Thiazolidinediones (Rosiglitazone)	Thiazolidinediones	3	28	10				5.2725	10.2675	0.513514										0.7	0.28	5	2	0.8	2	1	0.4
3131	Seo 2008	PPAR agonists treatment is effective in a nonalcoholic fattyliver disease animal model by modulating fatty-acidmetabolic enzymes	Otsuka Long-Evans Tokushima Fatty (OLETF) rat	Otsuka Long-Evans Tokushima Fatty (OLETF) rat	Long Evans	Long Evans	1	0	1	0	2					M	Seo 2008_1	Fenofibrate	100	mg/kg	100 mg/kg	Fibrate (Fenofibrate)	Fibrates	3	28	10				6.66	10.2675	0.648649										0	0.1	5	2	0.8	3	1	0.4
601	Zhang 2017	Effects of telmisartan on improving leptin resistance and inhibiting hepatic fibrosis in rats with non‑alcoholic fatty liver disease	High Fat + High Cholesterol Diet	High Fat + High Cholesterol Diet	Sprague Dawley	Sprague Dawley	1	1	1	0	3	2			22	M	Zhang 2017	Telmisartan	8	mg/kg	8 mg/kg	ARB (Telmisartan)	Angiotensin Receptor Blocker	19	4	20																2.41	2.37	10	2.89	1.01	10	1.37	2.47
2538	Muramatsu-Kato 2015	Undernourishment in utero Primes Hepatic Steatosis in Adult Mice Offspring on an Obesogenic Diet; Involvement of Endoplasmic Reticulum Stress	Maternal undernourishment + HFD in offspring	Maternal undernourishment + HFD in offspring	C57BL/6?	C57BL/6?	1	1	0	0	2				60	M	Muramatsu-Kato 2015	Tauroursodeoxycholic acid (TUDCA)	500	mg/kg	500 mg/kg	Tauroursodeoxycholic acid (TUDCA)	Tauroursodeoxycholic acid (TUDCA)	2	11	4.75				10.3841	11.8382	0.877168	1228.5	1155	1.06364	0.0873	0.04796	10	0.265	0.0137	7	1.5	1.22	10	3	0.1	7
3691	Koh 2012	Fenretinide ameliorates insulin resistance and fatty liver in obese mice.	Leptin Deficiency (ob/ob) + HFD	Leptin Deficiency (ob/ob) + HFD	C57BL/6?	C57BL/6?	1	0	0	0	1				45	M	Koh 2012	Fenretinide	20	mg/kg	20 mg/kg	Fenretinide	Fenretinide	1.75	3	2.5				11.9325	16.9275	0.704918	2175	3000	0.725	0.0463259	0.00814782	13	0.0700538	0.0325913	13	1.8	0.4	5	3	0.1	5
4078	Magyar 2011	Increased Total Scavenger Capacity and Decreased Liver Fat Content in Rats Fed Dehydroepiandrosterone and Its Sulphate on a High-Fat Diet	High Fat + High Cholesterol Diet	High Fat + High Cholesterol Diet	Sprague Dawley	Sprague Dawley	1	1	0	0	2	1			22	M	Magyar 2011	Docosahexaenoic acid			400mcrg/ml	Docosahexaenoic acid	Docosahexaenoic acid	3.84061	4	4.84061																0.4	0.55	5	1.6	0.55	5
1443	Garcia-Heredia 2016	Metformin administration induces hepatotoxic effects in paraoxonase-1-deficient mice	Paraoxonase-1 (PON1) -/- mice	Paraoxonase-1 (PON1) -/- mice	C57BL/6J	C57BL/6J	1	0	0	0	1					M	Garcia-Heredia 2016_1	Metformin	166	mg/kg	166 mg/kg/day	Metformin	Biguanide	2.5	14	6				12.9	14.9	0.865772										2.6	0.1	8	1.4	0.5	8
1443	Garcia-Heredia 2016	Metformin administration induces hepatotoxic effects in paraoxonase-1-deficient mice	Paraoxonase-1 (PON1) -/- mice + HFHCD	Paraoxonase-1 (PON1) -/- mice + HFHCD	C57BL/6J	C57BL/6J	1	0	0	0	1				40	M	Garcia-Heredia 2016_2	Metformin	166	mg/kg	166 mg/kg/day	Metformin	Biguanide	2.5	14	6				21.5	19.5	1.10256										1.8	0.5	8	2.8	0.1	8
4349	Kurihara 1997	Efects of eicosapentaenoic acid on blood rheology in rats with fatty liver	Choline deficient diet	Choline deficient diet	Sprague Dawley	Sprague Dawley	0	0	0	0	0					M	Kurihara 1997	Eicosapentaenoic acid	1000	mg/kg	1000mg/kg	Eicosapentaenoic acid	Eicosapentaenoic acid	3.5	4	4.5																2.375	0.744024	8	1	0.534522	8
4997	Jena 2018	Synbiotics Bifidobacterium infantis and milk oligosaccharides are effective in reversing cancer-prone nonalcoholic steatohepatitis using western diet-fed FXR knockout mouse models	FXR-/- + Western diet	FXR-/- + Western diet	C57BL/6J	C57BL/6J	1	0	0	0	1	0.2		31	42	M	Jena 2018	Bifidobacterium infantis			10x9 cfu once per week	Bifidobacterium infantis	Bifidobacterium sp.	3	28	10				11.9325	12.4875	0.955556				0.0621445	0.0169485	8	0.11864	0.011299	8	1.4	0.6	8	2.8	0.4	8
4018	Hamza 2015	Effect of Centaurium erythraea Rafn, Artemisia herba-alba Asso and Trigonella foenum-graecum L. on liver fat accumulation in C57BL/6J mice with high-fat diet-induced type 2 diabetes	High Fat Diet / HFD	High Fat Diet / HFD	C57BL/6J	C57BL/6J	1	0	1	0	2					M	Hamza 2015_1	Trigonella Foenum-gracum Seed Extract	2000	mg/kg	2000 mg/kg body weight	Trigonella Foenum-gracum Seed Extract	Trigonella seed extract	1	20	6																0.75	1.16	8	1.9	1.1	10
4018	Hamza 2015	Effect of Centaurium erythraea Rafn, Artemisia herba-alba Asso and Trigonella foenum-graecum L. on liver fat accumulation in C57BL/6J mice with high-fat diet-induced type 2 diabetes	High Fat Diet / HFD	High Fat Diet / HFD	C57BL/6J	C57BL/6J	1	0	1	0	2					M	Hamza 2015_2	Trigonella Foenum-gracum Seed Extract	2000	mg/kg	2000 mg/kg body weight	Trigonella Foenum-gracum Seed Extract	Trigonella seed extract	1	35	9.75																2.2	1.03	8	3	0.1	10
48	De Oliveira 2016	Bile Acid Receptor Agonists Int747 and Int777 Decrease Oestrogen Deficiency-Related Postmenopausal Obesity and Hepatic Steatosis in Mice.	Ovariectomy + HFD	Ovariectomy + HFD	CD-2	CD-1	1	1	0	0	2				45	F	De Oliveira 2016_1	Obeticholic acid (INT747)	50	mg/kg	50 mg/kg	FXR agonist (Obetacholic acid)	FXR agonist	3	4	4										1.69485	0.639168	8	7.9093	4.47418	8
48	De Oliveira 2016	Bile Acid Receptor Agonists Int747 and Int777 Decrease Oestrogen Deficiency-Related Postmenopausal Obesity and Hepatic Steatosis in Mice.	High Fat Diet / HFD	High Fat Diet / HFD	CD-1	CD-1	1	1	0	0	2				45	F	De Oliveira 2016_2	Obeticholic acid (INT747)	50	mg/kg	50 mg/kg	FXR agonist (Obetacholic acid)	FXR agonist	3	4	4										3.05073	3.19584	8	4.23712	1.59792	8
73	Chiba 2016	Diet-Induced Non-Alcoholic Fatty Liver Disease Affects Expression of Major Cytochrome P450 Genes in a Mouse Model.	High Fat + High Sucrose	High Fat + High Sucrose	C57BL/6?	C57BL/6?	1	0	0	0	1				55	F	Chiba 2016	Resveratrol	0.05	%	0.05% (w/w)	Polyphenol (Resveratrol)	Polyphenol (Resveratrol)	2.3	12	5.3										0.178524	0.113691	5	0.197732	0.0631614	5
252	Xiong 2014	Hepatic steatosis exacerbated by endoplasmic reticulum stress-mediated downregulation of FXR in aging mice	Ageing	Ageing	C57BL/6?	C57BL/6?	1	0	0	0	1					M	Xiong 2014_1	GW4064	30	mg/kg	30 mg/kg	GW4064	FXR agonist	18	1.5	18.375										0.0395465	0.00746864	7	0.0621445	0.0209257	7
252	Xiong 2014	Hepatic steatosis exacerbated by endoplasmic reticulum stress-mediated downregulation of FXR in aging mice	Ageing	Ageing	C57BL/6?	C57BL/6?	1	0	0	0	1					M	Xiong 2014_2	TUDCA (tauroursodeoxycholic acid)	250	mg/kg	250 mg/kg	Tauroursodeoxycholic acid (TUDCA)	Tauroursodeoxycholic acid (TUDCA)	18	1	18.25										0.0497156	0.0311594	5	0.0915219	0.0215719	5
312	Kudo 2009	Telmisartan attenuates progression of steatohepatitis in mice: role of hepatic macrophage infiltration and effects on adipose tissue	MCD + HFD (MCDHF)	MCD + HFD (MCDHF)	C57BL/6?	C57BL/6?	1	1	0	0	2			37	65	M	Kudo 2009	Telmisartan	10	mg/kg	10 mg/kg/day	ARB (Telmisartan)	Angiotensin Receptor Blocker	2.3	4	3.3										0.119769	0.0271176	4	0.163835	0.0150653	4
314	Fujita 2006	Telmisartan, An Angiotensin II Type 1 Receptor Blocker, Controls Progress of Nonalcoholic Steatohepatitis in Rats	Choline-deficient L-amino-defined diet / CDAA	Choline-deficient L-amino-defined diet / CDAA	F344	F344	1	0	0	0	1					M	Fujita 2006_3	Telmisartan	5	mg/kg	5 mg/kg/day	ARB (Telmisartan)	Angiotensin Receptor Blocker	1.6	12	4.6										0.067794	0.0141237	10	0.170615	0.022598	3
314	Fujita 2006	Telmisartan, An Angiotensin II Type 1 Receptor Blocker, Controls Progress of Nonalcoholic Steatohepatitis in Rats	Choline-deficient L-amino-defined diet / CDAA	Choline-deficient L-amino-defined diet / CDAA	F344	F344	1	0	0	0	1					M	Fujita 2006_1	Valsartan	5	mg/kg	5 mg/kg/day	Valsartan	Angiotensin Receptor Blocker	1.6	12	4.6										0.133328	0.0022598	10	0.170615	0.022598	3
314	Fujita 2006	Telmisartan, An Angiotensin II Type 1 Receptor Blocker, Controls Progress of Nonalcoholic Steatohepatitis in Rats	Choline-deficient L-amino-defined diet / CDAA	Choline-deficient L-amino-defined diet / CDAA	F344	F344	1	0	0	0	1					M	Fujita 2006_2	Pioglitazone	1.875	mg/kg	1.875 mg/kg/day	Thiazolidinediones (Pioglitazone)	Thiazolidinediones	1.6	12	4.6										0.0734435	0.0141237	10	0.170615	0.022598	4
397	Arias 2015	Liver Delipidating Effect of a Combination of Resveratrol and Quercetin in Rats Fed an Obesogenic Diet	High Fat + High Sucrose	High Fat + High Sucrose	Wistar	Wistar	1	1	0	0	2			20	46	M	Arias 2015	Resveratrol	15	mg/kg	15 mg/kg	Polyphenol (Resveratrol)	Polyphenol (Resveratrol)	1.6	6	3.1										0.0587548	0.0135588	9	0.0590938	0.011186	9
405	Soledad Roselli 2009	Losartan Reduces Liver Expression of Plasminogen Activator Inhibitor-1 (Pai-1) in a High Fat-Induced Rat Nonalcoholic Fatty Liver Disease Model.	High Fat Diet / HFD	High Fat Diet / HFD	Sprague Dawley	Sprague Dawley	1	1	1	0	3				65	M	Soledad Roselli 2009_1	Losartan	10	mg/kg	10 mg/kg	ARB (Losartan)	Angiotensin Receptor Blocker	4.6	12	7.6				10.2675	11.1	0.925	0.6	1.14	0.526316	0.0106211	0.00406764	10	0.0187563	0.00511334	4
405	Soledad Roselli 2009	Losartan Reduces Liver Expression of Plasminogen Activator Inhibitor-1 (Pai-1) in a High Fat-Induced Rat Nonalcoholic Fatty Liver Disease Model.	High Fat Diet / HFD	High Fat Diet / HFD	Sprague Dawley	Sprague Dawley	1	1	1	0	3				65	M	Soledad Roselli 2009_2	Telmisartan	10	mg/kg	10 mg/kg	ARB (Telmisartan)	Angiotensin Receptor Blocker	4.6	12	7.6				9.435	11.1	0.85	0.24	1.14	0.210526	0.00824827	0.00178653	9	0.0187563	0.00511334	4
439	Yamada 2015b	Suppressive Role of PPARγ-Regulated Endothelial Nitric Oxide Synthase in Adipocyte Lipolysis	High Fat Diet / HFD	High Fat Diet / HFD	C57BL/6J	C57BL/6J	1	0	0	0	1				35		Yamada 2015b	Ciglitazone	10	mg/kg	10 mg/kg	Ciglitazone	Thiazolidinediones	1.8	2.5	2.425										0.045196	0.033897	4	0.11299	0.022598	4
498	Ambika 2016	Anti-hyperglycemic and anti-hyperlipidemic effect of bergenin on C57BL/6J mice with high fat-diet induced type 2 diabetes	High Fat Diet / HFD	High Fat Diet / HFD	C57BL/6J	C57BL/6J	1	1	0	0	2				60	M	Ambika 2016	Metformin	25	mg/kg	25 mg/kg	Metformin	Biguanide	2.8	8	4.8				5.2725	11.655	0.452381				0.0128	0.0009	6	0.026	0.0019	6
516	Reichold 2013	Bifidobacterium Adolescentis Protects from the Development of Nonalcoholic Steatohepatitis in a Mouse Model.	Western diet	Western diet	C57BL/6J	C57BL/6J	1	0	0	0	1	0.2			42		Reichold 2013	Bifidobacterium Adolescentis			5x10^7cfu/ml	Bifidobacterium Adolescentis	Bifidobacterium sp.	2	12	5
539	Raso 2008	Comparative Therapeutic Effects of Metformin and Vitamin E in a Model of Non-Alcoholic Steatohepatitis in the Young Rat.	High Fat Diet / HFD	High Fat Diet / HFD	Sprague Dawley	Sprague Dawley	1	1	0	0	2				71	M	Raso 2008_1	Metformin	250	mg/kg	250 mg/kg	Metformin	Biguanide	0.75	4	1.75										0.201122	0.0423455	6	0.309932	0.0401313	3
539	Raso 2008	Comparative Therapeutic Effects of Metformin and Vitamin E in a Model of Non-Alcoholic Steatohepatitis in the Young Rat.	High Fat Diet / HFD	High Fat Diet / HFD	Sprague Dawley	Sprague Dawley	1	1	0	0	2				71	M	Raso 2008_2	Vitamin E			30 IU/kg	Vitamin E	Vitamin E	0.75	4	1.75										0.229709	0.0636566	6	0.309932	0.0401313	3
647	Alberdi 2013	Hepatic Lipid Metabolic Pathways Modified by Resveratrol in Rats Fed an Obesogenic Diet	High Fat + High Sucrose	High Fat + High Sucrose	Sprague Dawley	Sprague Dawley	1	1	0	0	2			17	45	M	Alberdi 2013	Resveratrol	30	mg/kg	30 mg/kg	Polyphenol (Resveratrol)	Polyphenol (Resveratrol)		6											0.0124289	0.00255667	8	0.0169485	0.00559272	8
702	Li 2014b	Resveratrol modulates autophagy and NF-kB activity in a murine model for treating non-alcoholic fatty liver disease	ULK1 heterozygous KO mice + HFD	ULK1 heterozygous KO mice + HFD	C57BL/6J	C57BL/6J	1	0	0	0	1				45	M	Li 2014b	Resveratrol	50	mg/kg	50 mg/kg	Polyphenol (Resveratrol)	Polyphenol (Resveratrol)	2	4	3				5.3	4.8	1.10417	52.5	60	0.875
839	Harris 2016	The effects of prenatal metformin on obesogenic diet-induced alterations in maternal and fetal fatty acid metabolism	High calorie diet	High calorie diet	Wistar	Wistar	1	1	0	0	2			7	55	F	Harris 2016	Metformin	300	mg/kg	300 mg/kg	Metformin	Biguanide	7	3	7.75										0.00531053	0.00158186	8	0.00508455	0.0011299	8
936	Yamagata 2013	Altered expression and function of hepatic natural killer T cells in obese and diabetic KK-Ay mice	KK-Ay + HFD	KK-Ay + HFD	KK-Ay	KK-Ay	1	1	0	0	2				57	M	Yamagata 2013	Pioglitazone			25 ml/kg	Thiazolidinediones (Pioglitazone)	Thiazolidinediones	2	0.7	2.175										0.135588	0.0378968	5	0.276825	0.0378968	5
959	Nakano 2008	Bezafibrate prevents hepatic stellate cell activation and fibrogenesis in a murine steatohepatitis model, and suppresses fibrogenic response induced by transforming growth factor-b1 in a cultured stellate cell line	KK-Ay + Methionine and choline deficient diet / MCD	KK-Ay + Methionine and choline deficient diet / MCD	KK-Ay	KK-Ay	1	1	0	0	2					M	Nakano 2008_2	Bezafibrate	0.1125	%	.15, 0.075% (wt/wt)	Fibrate (Bezafibrate)	Fibrates	3	7	4.75										0.007175	0.00127679	16	0.0107	0.00127679	4
959	Nakano 2008	Bezafibrate prevents hepatic stellate cell activation and fibrogenesis in a murine steatohepatitis model, and suppresses fibrogenic response induced by transforming growth factor-b1 in a cultured stellate cell line	KK-Ay + Methionine and choline deficient diet / MCD	KK-Ay + Methionine and choline deficient diet / MCD	KK-Ay	KK-Ay	1	1	0	0	2					M	Nakano 2008_1	Pioglitazone	0.03	%	0.03% (wt/wt)	Thiazolidinediones (Pioglitazone)	Thiazolidinediones	3	7	4.75										0.0118	0.000479376	8	0.0107	0.00127679	4
960	Pan 2006	Bifendate treatment attenuates hepatic steatosis in cholesterol/bile salt- and high-fat diet-induced hypercholesterolemia in mice	High Fat+ High Cholesterol Diet + bile salt	High Fat+ High Cholesterol Diet + bile salt	ICR	ICR	1	0	0	0	1	1			22	M	Pan 2006_1	Fenofibrate	0.1	%	0.1% (wt/wt)	Fibrate (Fenofibrate)	Fibrates	0.804598	0.5	0.929598										0.0038	0.0011	8	0.00915	0.00305	8
960	Pan 2006	Bifendate treatment attenuates hepatic steatosis in cholesterol/bile salt- and high-fat diet-induced hypercholesterolemia in mice	High Fat+ High Cholesterol Diet + bile salt	High Fat+ High Cholesterol Diet + bile salt	ICR	ICR	1	0	0	0	1	1			22	M	Pan 2006_2	Fenofibrate	0.1	%	0.1% (wt/wt)	Fibrate (Fenofibrate)	Fibrates	0.55	0.5	0.675										0.00469	0.00153	8	0.00828	0.0024	8
1201	Buko 2011	Ursodeoxycholic acid dose-dependently improves liver injury in rats fed a methionine- and choline-deficient diet	Methionine and choline deficient diet / MCD	Methionine and choline deficient diet / MCD	Wistar	Wistar	1	0	1	0	2					M	Buko 2011_1	Ursodeoxycholic acid	37.5	mg/kg	10, 20, 40, 80 mg/kg	UCDA	UCDA	2.5	4	3.5				4.825	9.2	0.524457	23.725	8.5	2.79118	2.89537e-05	7.14612e-06	40	4.80208e-05	7.14612e-06	10
1219	Wagnerberger 2013	Lactobacillus casei Shirota protects from fructose-induced liver steatosis: A mouse model	Fructose	High fructose	C57BL/6J	C57BL/6J	1	0	0	0	1		30				Wagnerberger 2013	Lactobacillus casei shirota (LCS)			6.8*10^7 CFU per g body weight	Lactobacillus casei shirota (LCS)	Lactobacillus sp.	2	8	4										0.00440661	0.00176829	5	0.011073	0.00404165	5
1242	Wang 2013	Morin reduces hepatic inflammation-associated lipid accumulation in high fructose-fed rats via inhibiting sphingosine kinase 1/sphingosine 1-phosphate signaling pathway	Fructose	High fructose	Sprague Dawley	Sprague Dawley	1	1	0	0	2		10			M	Wang 2013	Pioglitazone	4	mg/kg	4 mg/kg	Thiazolidinediones (Pioglitazone)	Thiazolidinediones	2.38404	4	3.38404				4.0515	4.2735	0.948052	282	552	0.51087	0.0146887	0.00437603	15	0.022033	0.00656412	15
1256	Wierzbicki 2009	Chronic, in vivo, PPARa activation prevents lipid overload in rat liver induced by high fat feeding	High Fat Diet / HFD	High Fat Diet / HFD	Wistar	Wistar	1	1	0	0	2				59	M	Wierzbicki 2009	Pioglitazone	3	mg/kg	3 mg/kg	Thiazolidinediones (Pioglitazone)	Thiazolidinediones	1.51715	2	2.01715										0.056	0.004	10	0.059	0.005	10
1326	Zaitone 2011	Pentoxifylline and melatonin in combination with pioglitazone ameliorate experimental non-alcoholic fatty liver disease	High Fat + High Cholesterol Diet	High Fat + High Cholesterol Diet	Wistar	Wistar	1	1	0	0	2	2			22	M	Zaitone 2011_2	Pentoxifylline	50	mg/kg	50 mg/kg/day	PDE inhibitor (Pentoxifylline)	PDE inhibitor (Pentoxifylline)	1.1526	8	3.1526				4.30125	4.995	0.861111	85.8	126	0.680952	0.0146887	0.00107192	10	0.016949	0.0035727	5
1326	Zaitone 2011	Pentoxifylline and melatonin in combination with pioglitazone ameliorate experimental non-alcoholic fatty liver disease	High Fat + High Cholesterol Diet	High Fat + High Cholesterol Diet	Wistar	Wistar	1	1	0	0	2	2			22	M	Zaitone 2011_1	Pioglitazone	4	mg/kg	4 mg/kg/day	Thiazolidinediones (Pioglitazone)	Thiazolidinediones	1.1526	8	3.1526				4.0515	4.995	0.811111	72	126	0.571429	0.0135588	0.0010723	10	0.016949	0.0035727	5
1335	Zhang 2013a	GLP-1 analogue prevents NAFLD in ApoE KO mice with diet and Acrp30 knockdown by inhibiting c-JNK	ApoE knockout (ApoE -/-) + Acrp30 knockdown + HFD	ApoE knockout (ApoE -/-) + Acrp30 knockdown + HFD	C57BL/6?	C57BL/6?	1	0	1	0	2				54	M	Zhang 2013a	Liraglutide	1	mg/kg	1 mg/kg	GLP-1 agonist (Liraglutide)	GLP-1 agonist	2	8	4				7.5	8	0.9375				0.0046	0.000689239	6	0.0092	0.00166095	6
1371	Zhang 2015a	PPARa/g agonists and antagonists differently affect hepatic lipid metabolism, oxidative stress and inflammatory cytokine production in steatohepatitic rats	High Fat + High Sucrose	High Fat + High Sucrose	Sprague Dawley	Sprague Dawley	1	1	1	0	3					M	Zhang 2015a_2	Fenofibrate	20	mg/kg	20 mg/kg	Fibrate (Fenofibrate)	Fibrates	1.4645	6	2.9645										0.08474	0.00565	8	0.14124	0.00565	4
1371	Zhang 2015a	PPARa/g agonists and antagonists differently affect hepatic lipid metabolism, oxidative stress and inflammatory cytokine production in steatohepatitic rats	High Fat + High Sucrose	High Fat + High Sucrose	Sprague Dawley	Sprague Dawley	1	1	1	0	3					M	Zhang 2015a_1	Rosiglitazone	4	mg/kg	4 mg/kg	Thiazolidinediones (Rosiglitazone)	Thiazolidinediones	1.4645	6	2.9645										0.10734	0.00339	8	0.14124	0.00565	4
1385	Kong 2008	Combination of simvastatin with berberine improvies lipid-lowering efficacy	High Fat + High Cholesterol Diet	High Fat + High Cholesterol Diet	Wistar	Wistar	1	1	0	0	2	2			47	M	Kong 2008_1	Berberine	90	mg/kg	90 mg/kg/day	Berberine	Berberine	3.33488	4.5	4.45988										0.00853	0.00174	9	0.0122	0.003184	3
1385	Kong 2008	Combination of simvastatin with berberine improvies lipid-lowering efficacy	High Fat + High Cholesterol Diet	High Fat + High Cholesterol Diet	Wistar	Wistar	1	1	0	0	2	2			47	M	Kong 2008_2	Simvastatin	9	mg/kg	6,12 mg/kg/d	Statin (Simvastatin)	Statin	3.33488	4.5	4.45988										0.00799	0.001695	18	0.0122	0.003184	3
1415	Lee 2016c	Ezetimibie, an NPC1L1 inhibitor, is a potent Nrf2 activator that protects mice from diet-induced nonalcoholic steatohepatitis	Methionine and choline deficient diet / MCD	Methionine and choline deficient diet / MCD	C57BL/6J	C57BL/6J	1	1	0	0	2					M	Lee 2016c	Ezetimibe	10	mg/kg	10 mg/kg/day	Ezetimibe	Cholesterol Absorption Inhibitor	2.5	4	3.5										0.02825	0.01695	9	0.06214	0.0113	9
1430	Kajikawa 2009	Highly purified eicosapentaenoic acid prevents the progression of hepatic steatosis by repressing monounsaturated fatty acid syntehsis in high-fat/high-sucrose diet-fed mice	High Fat + High Cholesterol + High Sucrose Diet	High Fat + High Cholesterol + High Sucrose Diet	C57BL/6J	C57BL/6J	1	1	0	0	2	0.15		30	41	M	Kajikawa 2009_2	Eicosapentaenoic acid	466.667	mg/kg	100, 300, 1000 mg/kg	Eicosapentaenoic acid	Eicosapentaenoic acid	1.2	2	1.7										0.0192083	0.00426108	24	0.0361568	0.0127837	8
1452	Heidarian 2014	Metabolic effects of berberine on liver phosphatidate phosphohydrolase in rats fed on high lipogenic diet: an additional mechanism for the hypolipidemic effects of berberine	High Fat + High Cholesterol Diet	High Fat + High Cholesterol Diet	Wistar	Wistar	1	1	0	0	2	2			40	M	Heidarian 2014	Berberine	90	mg/kg	90 mg/kg/day	Berberine	Berberine	1.77439	6.5	3.39939										0.009356	0.000463	8	0.01227	0.000294	8
1467	Okada 2013	Rosuvastatin ameliorates high-fat and high-cholesterol diet-inducednonalcoholic steatohepatitis in rats	High Fat + High Cholesterol Diet	High Fat + High Cholesterol Diet	Sprague Dawley	Sprague Dawley	1	1	0	0	2	1.25			58	M	Okada 2013	Rosuvastatin	2	mg/kg	2 mg/kg	Statin (Rosuvastatin)	Statin	2	12	5										0.087	0.0176857	5	0.1096	0.0176857	5
1492	Yogalakshmi 2013a	Study on the Effect of Grape Seed Proanthocyanidins on Adipocytokine Receptors in Diet Induced Fatty Liver Disease	High Fat + High Fructose Diet	High Fat + High Fructose Diet	Wistar	Wistar	1	1	0	0	2		45		40	M	Yogalakshmi 2013a	Metformin	50	mg/kg	50 mg/kg	Metformin	Biguanide	2.75	2	3.25										0.2407	0.0171745	6	0.2723	0.0216941	6
1658	Schaalan 2012	Effects of pioglitazone and/or simvastatin on circulating TNFα and adiponectin levels in insulin resistance	Fructose	High fructose	Wistar	Wistar	1	0	0	0	1		60			M	Schaalan 2012_3	Simvastatin	20	mg/kg	20mg/kg	Statin (Simvastatin)	Statin	1.09185	2	1.59185				8.88	9.0465	0.981595	132	156	0.846154	0.305073	0.033897	10	0.508455	0.056495	5
1658	Schaalan 2012	Effects of pioglitazone and/or simvastatin on circulating TNFα and adiponectin levels in insulin resistance	Fructose	High fructose	Wistar	Wistar	1	0	0	0	1		60			M	Schaalan 2012_2	Pioglitazone	10	mg/kg	10 mg/kg	Thiazolidinediones (Pioglitazone)	Thiazolidinediones	1.09185	2	1.59185				6.66	9.0465	0.736196	114	156	0.730769	0.395465	0.033897	10	0.508455	0.056495	5
1717	Xu 2014a	Hepatic Carboxylesterase 1 Is Essential for Both Normal and Farnesoid X Receptor-Controlled Lipid Homeostasis	Carboxylesterase 1 knock down	Carboxylesterase 1 knock down	C57BL/6J	C57BL/6J	1	0	0	0	1					M	Xu 2014a_1	Obetacholic acid	30	mg/kg	30 mg/kg	FXR agonist (Obetacholic acid)	FXR agonist		1											0.00847425	0.00135588	9	0.011073	0.00135588	9
1717	Xu 2014a	Hepatic Carboxylesterase 1 Is Essential for Both Normal and Farnesoid X Receptor-Controlled Lipid Homeostasis	Carboxylesterase 1 knock down	Carboxylesterase 1 knock down	C57BL/6J	C57BL/6J	1	0	0	0	1					M	Xu 2014a_2	GW4064	30	mg/kg	30 mg/kg	GW4064	FXR agonist		1											0.00621445	0.00305073	9	0.0103951	0.00271176	9
1811	Shiri-Sverdlov 2006	Early diet-induced non-alcoholic steatohepatitis in apoE knock-in mice and its prevention by fibrates	ApoE2 knock-in model + HFD + cholesterol	ApoE2 knock-in model + HFD + cholesterol	Not stated	Not stated	1	0	0	0	1	0.2			42	F	Shiri-Sverdlov 2006_1	Fenofibrate	0.2	%	0.002	Fibrate (Fenofibrate)	Fibrates	3.25	3	4										0.22598	0.0893299	10	1.31068	0.73248	10
1811	Shiri-Sverdlov 2006	Early diet-induced non-alcoholic steatohepatitis in apoE knock-in mice and its prevention by fibrates	ApoE2 knock-in model + HFD + cholesterol	ApoE2 knock-in model + HFD + cholesterol	Not stated	Not stated	1	0	0	0	1	0.2			42	F	Shiri-Sverdlov 2006_4	Fenofibrate	0.2	%	0.002	Fibrate (Fenofibrate)	Fibrates	3.25	1	3.5										0.361568	0.0535912	10	0.700538	0.464497	10
1811	Shiri-Sverdlov 2006	Early diet-induced non-alcoholic steatohepatitis in apoE knock-in mice and its prevention by fibrates	ApoE2 knock-in model + HFD + cholesterol	ApoE2 knock-in model + HFD + cholesterol	Not stated	Not stated	1	0	0	0	1	0.2			42	F	Shiri-Sverdlov 2006_3	Fenofibrate	0.2	%	0.002	Fibrate (Fenofibrate)	Fibrates	3.25	0.571429	3.39286										0.519754	0.357308	10	0.632744	0.393036	10
1811	Shiri-Sverdlov 2006	Early diet-induced non-alcoholic steatohepatitis in apoE knock-in mice and its prevention by fibrates	ApoE2 knock-in model + HFD + cholesterol	ApoE2 knock-in model + HFD + cholesterol	Not stated	Not stated	1	0	0	0	1	0.2			42	F	Shiri-Sverdlov 2006_2	Fenofibrate	0.2	%	0.002	Fibrate (Fenofibrate)	Fibrates	3.25	0.285714	3.32143										0.802229	0.142921	10	0.655342	0.393036	10
1825	Pan 2011	Effective kinetics of schisandrin B on serum/hepatic triglyceride and total cholesterol levels in mice with and without the influence of fenofibrate	Schisandrin B-induced hypertriglyceridemia model (0.8g/kg)	Schisandrin B-induced hypertriglyceridemia model (0.8g/kg)	ICR	ICR	1	0	0	0	1					M	Pan 2011_3	Fenofibrate	100	mg/kg	100 mg/kg/day	Fibrate (Fenofibrate)	Fibrates	1	0.571429	1.14286										0.0038	0.0003	10	0.0125	0.0024	10
1825	Pan 2011	Effective kinetics of schisandrin B on serum/hepatic triglyceride and total cholesterol levels in mice with and without the influence of fenofibrate	Schisandrin B-induced hypertriglyceridemia model (0.4g/kg)	Schisandrin B-induced hypertriglyceridemia model (0.4g/kg)	ICR	ICR	1	0	0	0	1					M	Pan 2011_2	Fenofibrate	100	mg/kg	100 mg/kg/day	Fibrate (Fenofibrate)	Fibrates	1	0.571429	1.14286										0.0039	0.0002	10	0.0123	0.0021	10
1825	Pan 2011	Effective kinetics of schisandrin B on serum/hepatic triglyceride and total cholesterol levels in mice with and without the influence of fenofibrate	Schisandrin B-induced hypertriglyceridemia model (1.6g/kg)	Schisandrin B-induced hypertriglyceridemia model (1.6g/kg)	ICR	ICR	1	0	0	0	1					M	Pan 2011_4	Fenofibrate	100	mg/kg	100 mg/kg/day	Fibrate (Fenofibrate)	Fibrates	1	0.571429	1.14286										0.004	0.0004	10	0.0137	0.0031	10
1825	Pan 2011	Effective kinetics of schisandrin B on serum/hepatic triglyceride and total cholesterol levels in mice with and without the influence of fenofibrate	Schisandrin B-induced hypertriglyceridemia model (0.2g/kg)	Schisandrin B-induced hypertriglyceridemia model (0.2g/kg)	ICR	ICR	1	0	0	0	1					M	Pan 2011_1	Fenofibrate	100	mg/kg	100 mg/kg/day	Fibrate (Fenofibrate)	Fibrates	1	0.571429	1.14286										0.0041	0.0002	10	0.0079	0.0022	10
1829	Nagasawa 2006	Effects of bezafibrate, PPAR pan-agonist, and GW501516, PPAR𝛿 agonist, on development of steatohepatitis in mice fed a methionine-and choline-deficient diet	Methionine and choline deficient diet / MCD	Methionine and choline deficient diet / MCD	C57BL/6J	C57BL/6J	1	1	0	0	2					M	Nagasawa 2006_1	Bezafibrate	75	mg/kg	50, 100 mg/kg	Fibrate (Bezafibrate)	Fibrates	2.25	5	3.5										0.0271	0.00719048	16	0.0621	0.0095872	4
1829	Nagasawa 2006	Effects of bezafibrate, PPAR pan-agonist, and GW501516, PPAR𝛿 agonist, on development of steatohepatitis in mice fed a methionine-and choline-deficient diet	Methionine and choline deficient diet / MCD	Methionine and choline deficient diet / MCD	C57BL/6J	C57BL/6J	1	1	0	0	2					M	Nagasawa 2006_2	GW501516	10	mg/kg	10 mg/kg	GW501516	PPARalpha-delta agonist	2.25	5	3.5										0.0305073	0.00639168	8	0.0621	0.0095872	4
1879	Hwahng 2009	Role of Adenosine Monophosphate-Activated Protein Kinase–p70 Ribosomal S6 Kinase-1 Pathway in Repression of Liver X Receptor-Alpha–Dependent Lipogenic Gene Induction and Hepatic Steatosis by a Novel Class of Dithiolethiones	High Fat Diet / HFD	High Fat Diet / HFD	C57BL/6?	C57BL/6?	1	0	0	0	1					M	Hwahng 2009_1	Oltipraz	8.57143	mg/kg	10, 30 mg/kg, 3 times a week	LXR inhibitor (Oltipraz)	LXR inhibition	3	4	4										0.0460652	0.0196667	16	0.0764855	0.01475	8
1917	Baron 2011	PPARα activation differently affects microparticle content in atherosclerotic lesions and liver of a mouse model of atherosclerosis and NASH.	ApoE2 knock-in model + Western-diet	ApoE2 knock-in model + Western-diet	129Sv?-C57BL/6?	Mixed	1	0	0	0	1				41	F	Baron 2011	Fenofibrate	0.2	%	Diet was supplemented with 0.2% fenofibrate	Fibrate (Fenofibrate)	Fibrates	3	1.43	3.3575										0.199078	0.0456549	8	0.317448	0.121746	8
1927	Velayudham 2009	VSL#3 Probiotic Treatment Attenuates Fibrosis Without Changes in Steatohepatitis in a Diet-Induced Nonalcoholic Steatohepatitis Model in Mice	Methionine and choline deficient diet / MCD	Methionine and choline deficient diet / MCD	C57BL/6J	C57BL/6J	1	0	1	0	2					F	Velayudham 2009	VSL#3 probiotic			450 billion colonies/litre water	Probiotic (VSL#3)	Probiotic (mix)	2	9	4.25										0.0610146	0.0351542	8	0.0259877	0.00159768	8
1953	Yogalakshmi 2013b	Grape Seed Proanthocyanidin Rescues Rats from Steatosis: A Comparative and Combination Study with Metformin	High Fat + High Fructose Diet	High Fat + High Fructose Diet	Wistar	Wistar	1	0	0	0	1		45		40	M	Yogalakshmi 2013b	Metformin	50	mg/kg	50 mg/kg	Metformin	Biguanide	2.82	2	3.32				8.0475	12.4875	0.644444				0.00847425	0.000376633	6	0.00998078	0.00056495	6
1959	Berthiaume 2009	Additive action of 11b-HSD1 inhibition and PPAR-c agonism on hepatic steatosis and triglyceridemia in diet-induced obese rats	High Fat + High Sucrose	High Fat + High Sucrose	Sprague Dawley	Sprague Dawley	1	0	0	0	1				39	M	Berthiaume 2009	Rosiglitazone	5	mg/kg	5 mg/kg/day	Thiazolidinediones (Rosiglitazone)	Thiazolidinediones	1.125	6	2.625				8.8	9	0.977778	240	530	0.45283	0.012	0.0028	8	0.025	0.014	8
1966	Liu 2014b	Activation of farnesoid X receptor (FXR) protects against fructose-induced liver steatosis via inflammatory inhibition and ADRP reduction	Fructose + LPS	Fructose + LPS	C57BL/6J	C57BL/6J	1	0	0	0	1		30				Liu 2014b_2	WAY-362450 (WAY)	30	mg/kg	30 mg/kg	WAY-362450 (WAY)	FXR agonist	2	2.85714	2.71429										0.1017	0.032	8	0.164	0.0223	8
1966	Liu 2014b	Activation of farnesoid X receptor (FXR) protects against fructose-induced liver steatosis via inflammatory inhibition and ADRP reduction	Fructose	High fructose	C57BL/6J	C57BL/6J	1	0	0	0	1		30				Liu 2014b_1	WAY-362450 (WAY)	30	mg/kg	30 mg/kg	WAY-362450 (WAY)	FXR agonist	2	2.85714	2.71429										0.146	0.031	8	0.35	0.175	8
2039	Ding 2006	Exendin-4, a Glucagon-Like Protein-1 (GLP-1) Receptor Agonist, Reverses Hepatic Steatosis in ob/ob Mice	Leptin Deficiency (ob/ob)	Leptin Deficiency (ob/ob)	Not stated	Not stated	1	1	1	0	3					M	Ding 2006 _1	Exendin-4	0.015	mg/kg	0.01, .02 mg/kg/day	GLP-1 agonist (Exenatide)	GLP-1 agonist	2	8.57	4.1425				12.6	18.1	0.696133	26.4	80.4	0.328358	0.0248578	0.00479304	16	0.0406764	0.00479304	8
2049	Forrest 2013	Echium Oil Reduces Plasma Triglycerides by Increasing Intravascular Lipolysis in apoB100-Only Low Density Lipoprotein (LDL) Receptor Knockout Mice	LDL-receptor knockout (LDL-/-) + apoB100-only (ApoB48 -/-) + Palm oil	LDL-receptor knockout (LDL-/-) + apoB100-only (ApoB48 -/-) + Palm oil	C57BL/6?	C57BL/6?	1	1	0	0	2				20	M	Forrest 2013	Fish oil/omega 3			10% of calories in diet from fish oil	PUFA (Fish oil)	Omega-3 polyunsaturated fatty acids (mix)	2	16	6										0.109094	0.047239	12	0.161693	0.0311697	16
2116	Pan 2013	A Novel Mouse Model of Combined Hyperlipidemia Associated With Steatosis and Liver Injury by a Single-Dose Intragastric Administration of Schisandrin B/Cholesterol/Bile Salts Mixture	Oral administration of Schisandrin B, cholesterol, and bile salt suspended in olive oil	Oral administration of Schisandrin B, cholesterol, and bile salt suspended in olive oil	ICR	ICR	1	0	0	0	1					M	Pan 2013 _1	Fenofibrate	100	mg/kg	100 mg/kg	Fibrate (Fenofibrate)	Fibrates	0.91954	0.428571	1.02668										0.003	0.000395285	10	0.00575	0.000790569	10
2116	Pan 2013	A Novel Mouse Model of Combined Hyperlipidemia Associated With Steatosis and Liver Injury by a Single-Dose Intragastric Administration of Schisandrin B/Cholesterol/Bile Salts Mixture	Oral administration of Schisandrin B, cholesterol, and bile salt suspended in olive oil	Oral administration of Schisandrin B, cholesterol, and bile salt suspended in olive oil	ICR	ICR	1	0	0	0	1					M	Pan 2013 _2	Fenofibrate	100	mg/kg	100 mg/kg	Fibrate (Fenofibrate)	Fibrates	0.91954	0.285714	0.990969										0.004375	0.000790569	10	0.010125	0.00197642	10
2116	Pan 2013	A Novel Mouse Model of Combined Hyperlipidemia Associated With Steatosis and Liver Injury by a Single-Dose Intragastric Administration of Schisandrin B/Cholesterol/Bile Salts Mixture	Oral administration of Schisandrin B, cholesterol, and bile salt suspended in olive oil	Oral administration of Schisandrin B, cholesterol, and bile salt suspended in olive oil	ICR	ICR	1	0	0	0	1					M	Pan 2013 _3	Fenofibrate	100	mg/kg	100 mg/kg	Fibrate (Fenofibrate)	Fibrates	0.91954	0.142857	0.955255										0.010875	0.00276699	10	0.016	0.00395285	10
2159	Yachi 2013	Effects of tocotrienol on tumor necrosis factor-α/D-galactosamine-induced steatohepatitis in rats	High Fat Diet / HFD (vitamin E-deficient) + TNF-α + D-galactosamine (GalN)	High Fat Diet / HFD (vitamin E-deficient) + TNF-α + D-galactosamine (GalN)	Sprague Dawley	Sprague Dawley	1	0	0	0	1			22	40	M	Yachi 2013 _3	Vitamin E (α-tocopherol)	0.085	%	850 mg mixed with 1kg of diet mixture	Vitamin E	Vitamin E	1.8	4	2.8										0.0429362	0.00979247	4	0.0580015	0.0128055	4
2193	Tatarkiewiez 2014	Long-term metabolic benefits of exenatide in mice are mediated solely via the known glucagon-like peptide 1 receptor	High Fat Diet / HFD	High Fat Diet / HFD	C57BL/6?	C57BL/6?	1	1	0	0	2				58	M	Tatarkiewiez 2014	Exenatide	0.126	mg/kg	30 nmol/kg/day (126microg/kg/day)	GLP-1 agonist (Exenatide)	GLP-1 agonist		12					8.5	10.5	0.809524	52.5	270	0.194444	0.067794	0.0149472	7	0.124289	0.0448415	7
2247	Ragab 2015	Effect of a high fat, high sucrose diet on the promotion of non-alcoholic fatty liver disease in male rats: the ameliorative role of three natural compounds	High Fat + High Sucrose	High Fat + High Sucrose	Wistar	Wistar	1	1	0	0	2			10	31	M	Ragab 2015	Berberine	50	mg/kg	50 mg/kg	Berberine	Berberine	3	6	4.5										0.00989	0.00128	10	0.01311	0.00255	10
2274	Trevaskis 2012	Glucagon-like peptide-1 receptor agonism improves metabolic, biochemical, and histopathological indices of nonalcoholic steatohepatitis in mice	High fat, fructose, cholesterol (trans-fat)	High fat, fructose, cholesterol	C57BL/6J	C57BL/6J	1	0	1	0	2	2	22		40	M	Trevaskis 2012_1	Exenatide (AC3174)	0.03	mg/kg	0.03 mg/kg/day	GLP-1 agonist (Exenatide)	GLP-1 agonist	4.37	4	5.37				9.657	12.21	0.790909				0.118639	0.0276713	6	0.197732	0.0691951	6
2274	Trevaskis 2012	Glucagon-like peptide-1 receptor agonism improves metabolic, biochemical, and histopathological indices of nonalcoholic steatohepatitis in mice	High fat, fructose, cholesterol (lard)	High fat, fructose, cholesterol	C57BL/6J	C57BL/6J	1	0	1	0	2	2	22		40	M	Trevaskis 2012_2	Exenatide (AC3174)	0.03	mg/kg	0.03 mg/kg/day	GLP-1 agonist (Exenatide)	GLP-1 agonist	4.37	4	5.37				9.768	10.656	0.916667				0.22033	0.0498173	6	0.348009	0.0332078	6
2274	Trevaskis 2012	Glucagon-like peptide-1 receptor agonism improves metabolic, biochemical, and histopathological indices of nonalcoholic steatohepatitis in mice	High fat, fructose, cholesterol (weight-matched controls)	High fat, fructose, cholesterol	C57BL/6J	C57BL/6J	1	0	1	0	2	2	22		40	M	Trevaskis 2012_3	Exenatide (AC3174)	0.03	mg/kg	0.03 mg/kg/day	GLP-1 agonist (Exenatide)	GLP-1 agonist	4.37	4	5.37				10.434	11.433	0.912621				0.22824	0.0304395	6	0.322021	0.047049	6
2274	Trevaskis 2012	Glucagon-like peptide-1 receptor agonism improves metabolic, biochemical, and histopathological indices of nonalcoholic steatohepatitis in mice	Leptin Deficiency (ob/ob) + High fat (lard-fat), fructose, cholesterol diet	Leptin Deficiency (ob/ob) + High fat (lard-fat), fructose, cholesterol diet	Not stated	Not stated	1	0	1	0	2	2	22		40	M	Trevaskis 2012_4	Exenatide (AC3174)	0.03	mg/kg	0.03 mg/kg/day	GLP-1 agonist (Exenatide)	GLP-1 agonist	3.45	4	4.45				9.657	10.9335	0.883249				0.259877	0.011073	6	0.284735	0.0138413	6
2274	Trevaskis 2012	Glucagon-like peptide-1 receptor agonism improves metabolic, biochemical, and histopathological indices of nonalcoholic steatohepatitis in mice	Leptin Deficiency (ob/ob) + High fat (trans-fat), fructose, cholesterol diet (weight-matched controls)	Leptin Deficiency (ob/ob) + High fat (trans-fat), fructose, cholesterol diet (weight-matched controls)	Not stated	Not stated	1	0	1	0	2	2	22		40	M	Trevaskis 2012_6	Exenatide (AC3174)	0.03	mg/kg	0.03 mg/kg/day	GLP-1 agonist (Exenatide)	GLP-1 agonist	3.45	4	4.45										0.268916	0.022146	6	0.282475	0.0138413	6
2274	Trevaskis 2012	Glucagon-like peptide-1 receptor agonism improves metabolic, biochemical, and histopathological indices of nonalcoholic steatohepatitis in mice	Leptin Deficiency (ob/ob) + High fat (trans-fat), fructose, cholesterol diet	Leptin Deficiency (ob/ob) + High fat (trans-fat), fructose, cholesterol diet	Not stated	Not stated	1	0	1	0	2	2	22		40	M	Trevaskis 2012_5	Exenatide (AC3174)	0.03	mg/kg	0.03 mg/kg/day	GLP-1 agonist (Exenatide)	GLP-1 agonist	3.45	4	4.45				8.9355	10.0455	0.889503				0.283605	0.0166095	6	0.316372	0.0193778	6
2535	Zhang 2016	Berberine prevents progression from hepatic steatosis to steatohepatitis and fibrosis by reducing endoplasmic reticulum stress	Methionine and choline deficient diet / MCD	Methionine and choline deficient diet / MCD	C57BL/6J	C57BL/6J	1	0	0	0	1					M	Zhang 2016_2	Berberine	200	mg/kg	200 mg/kg/day	Berberine	Berberine	2.5	4	3.5										0.0847425	0.026632	8	0.133705	0.0213056	8
2535	Zhang 2016	Berberine prevents progression from hepatic steatosis to steatohepatitis and fibrosis by reducing endoplasmic reticulum stress	Tunicamycin	Tunicamycin	C57BL/6J	C57BL/6J	1	0	0	0	1					M	Zhang 2016_3	Berberine	200	mg/kg	200 mg/kg/day	Berberine	Berberine	2.35714	0.14285	2.39285										0.0530562	0.011116	10	0.0864619	0.0444638	10
2543	Machado 2016	Vitamin B5 and N-acetylcysteine in nonalcoholic steatohepatitis: a pre-clinical study in a dietary mouse model	Methionine and choline deficient diet / MCD	Methionine and choline deficient diet / MCD	C57BL/6J	C57BL/6J	1	0	0	0	1					M	Machado 2016	N-acetyl cysteine and vitamin B5			Vitamin B5: 250 mg/kg body weight, 3 times a week, IP injection; N-acetyl cysteine: 250 mg/kg body weight per day via drinking water	N-acetyl cysteine and vitamin B5	Anti-oxidant (other)		8											0.0474558	0.0151802	8	0.0355918	0.019175	8
2620	Kurikawa 2013	A Novel Inhibitor of Stearoyl-CoA Desaturase-1 Attenuates Hepatic Lipid Accumulation, Liver Injury and Inflammation in Model of Nonalcoholic Steatohepatitis	High Sucrose diet	High Sucrose diet	C57BL/6J	C57BL/6J	1	1	0	0	2			78		M	Kurikawa 2013_1	A novel SCD-1 inhibitor, N-(2-hydroxy-2-phenylethyl)-6-[4-(2-methyl benzoyl) piperi din-1-yl]pyridazine-3-carboxamide	46.6667	mg/kg	10, 30, 100 mg/kg	SCD-1 inhibitor	SCD-1 inhibitor	2.5	1	2.75										0.014877	0.00553538	18	0.0214681	0.00553538	6
2628	Okubo 2013	Lactobacillus caseistrain Shirota protects against nonalcoholic steatohepatitis development in a rodent model	Methionine and choline deficient diet / MCD	Methionine and choline deficient diet / MCD	C57BL/6?	C57BL/6?	1	1	0	0	2						Okubo 2013	Lactobacillus casei			10^9 cfu/d	Lactobacillus casei	Lactobacillus sp.	1.5	6	3										0.0271176	0.00718616	18	0.0350269	0.00978493	12
2630	Yamamoto 2016b	Glucagon-like peptide-1 analogue prevents nonalcoholic steatohepatitis in non-obese mice	Leptin Receptor Deficiency (db/db) + MCD	Leptin Receptor Deficiency (db/db) + MCD	Not stated	Not stated	1	0	1	0	2					M	Yamamoto 2016b_1	Exenatide (Synthetic exendin-4)	0.02	mg/kg	0.02 mg/kg/day	GLP-1 agonist (Exenatide)	GLP-1 agonist	1.75	4	2.75				6.0495	6.993	0.865079	360	645	0.55814	0.22598	0.127834	8	0.354789	0.0543293	8
2637	Staels 2013	Hepatoprotective Effects of the Dual Peroxisome Proliferator-Activated Receptor Alpha=Delta Agonist, GFT505, in Rodent Models of Nonalcoholic Fatty Liver Disease/Nonalcoholic Steatohepatitis	Human apolipoprotein E2 [hApoE2] transgenic mice + western-style diet	Human apolipoprotein E2 [hApoE2] transgenic mice + western-style diet	Not stated	Not stated	0	0	0	0	0						Staels 2013_1	Elafibranor / GFT505	1	mg/kg	1 mg/kg/day	PPARalpha-delta agonist (Elafibranor)	PPARalpha-delta agonist		7											0.090392	0.0237279	9	0.143497	0.0406764	9
2637	Staels 2013	Hepatoprotective Effects of the Dual Peroxisome Proliferator-Activated Receptor Alpha=Delta Agonist, GFT505, in Rodent Models of Nonalcoholic Fatty Liver Disease/Nonalcoholic Steatohepatitis	Human hApoE2 knock-in/PPAR-a knockout mice + western-style diet	Human hApoE2 knock-in/PPAR-a knockout mice + western-style diet	Not stated	Not stated	0	0	0	0	0						Staels 2013_2	Elafibranor / GFT505	3	mg/kg	3 mg/kg/day	PPARalpha-delta agonist (Elafibranor)	PPARalpha-delta agonist		7											0.11073	0.0440661	9	0.143497	0.0406764	9
2637	Staels 2013	Hepatoprotective Effects of the Dual Peroxisome Proliferator-Activated Receptor Alpha=Delta Agonist, GFT505, in Rodent Models of Nonalcoholic Fatty Liver Disease/Nonalcoholic Steatohepatitis	Leptin Receptor Deficiency (db/db) + MCD	Leptin Receptor Deficiency (db/db) + MCD	Not stated	Not stated	0	0	0	0	0						Staels 2013_3	Elafibranor / GFT505	3	mg/kg	3 mg/kg/day	PPARalpha-delta agonist (Elafibranor)	PPARalpha-delta agonist		7											0.133328	0.0406764	9	0.143497	0.0406764	9
2685	Yuan 2015	Berberine ameliorates nonalcoholic fatty liver disease by a global modulation of hepatic mRNA and lncRNA expression profiles	High Fat Diet / HFD	High Fat Diet / HFD	Sprague Dawley	Sprague Dawley	1	0	0	0	1				51	M	Yuan 2015	Berberine	200	mg/kg	200 mg/kg/day	Berberine	Berberine	1.4645	16	5.4645										0.0247166	0.0059922	8	0.0261459	0.0049935	8
2713	Sim 2015	Cinnamamides, Novel Liver X Receptor Antagonists that Inhibit Ligand-Induced Lipogenesis and Fatty Liver	LXRα ligand T0901317	LXRα ligand T0901317	C57BL/6?	C57BL/6?	1	1	0	0	2					M	Sim 2015_1	N-(4-trifluoromethylphenyl) 3,4-dimethoxycinnamamide (TFCA)	20	mg/kg	10, 30 mg/kg	N-(4-trifluoromethylphenyl) 3,4-dimethoxycinnamamide (TFCA)	LXR inhibition		0.571429											0.0378517	0.0056495	10	0.0429362	0.0022598	5
2768	Massart 2012	Pentoxifylline aggravates fatty liver in obese and diabeticob/obmice by increasing intestinal glucose absorption and activating hepatic lipogenesis	Leptin Deficiency (ob/ob)	Leptin Deficiency (ob/ob)	C57BL/6J	C57BL/6J	1	0	0	0	1					M	Massart 2012	Pentoxifylline	100	mg/kg	100 mg/kg	PDE inhibitor (Pentoxifylline)	PDE inhibitor (Pentoxifylline)	1.5	3	2.25				4.36	3.95	1.1038	1222.5	1156.5	1.05707	0.135927	0.0194908	11	0.123498	0.021728	11
2883	Lalloyer 2011	Peroxisome proliferator-activated receptor-alpha gene level differently affects lipid metabolism and inflammation in apolipoprotein E2 knock-in mice.	Human hApoE2 knock-in/PPAR-a knockout mice + western-style diet	Human hApoE2 knock-in/PPAR-a knockout mice + western-style diet	C57BL/6J	C57BL/6J	1	0	0	0	1				41	F	Lalloyer 2011	Fenofibrate	100	mg/kg	100 mg/kg	Fibrate (Fenofibrate)	Fibrates	3	9	5.25										0.261	0.00632	11	0.273	0.0825	11
2920	Liu 2007	Combined effects of rosiglitazone and conjugated linoleic acid on adiposity, insulin sensitivity, and hepatic steatosis in high-fat-fed mice	High Fat Diet / HFD	High Fat Diet / HFD	C57BL/6?	C57BL/6?	1	0	0	0	1				45	M	Liu 2007	Rosiglitazone, conjugated linoleic acid	10	mg/kg	10 mg/kg/day	Thiazolidinediones (Rosiglitazone)	Thiazolidinediones	9	6	10.5				5.2	5.97	0.871022	252.6	395.7	0.638362	0.0451	0.0179	10	0.107	0.0536	10
2989	Soares e Silva 2015	LPSF/GQ-02 Inhibits the Development of Hepatic Steatosis and Inflammation in a Mouse Model of Non-Alcoholic Fatty Liver Disease (NAFLD)	LDL-receptor knockout (LDL-/-) + HFD	LDL-receptor knockout (LDL-/-) + HFD	C57BL/6J	C57BL/6J	1	0	0	0	1				41	M	Soares e Silva 2015	Pioglitazone	20	mg/kg	20 mg/kg/day	Thiazolidinediones (Pioglitazone)	Thiazolidinediones		4.29					11.9325	17.76	0.671875				0.655	0.107	10	0.927	0.286	10
3072	Kim 2016	SREBP-2/PNPLA8 axis improves non-alcoholic fatty liver disease through activation of autophagy	High Fat Diet / HFD	High Fat Diet / HFD	C57BL/6?	C57BL/6?	1	0	0	0	1				60	M	Kim 2016	Lovastatin and ezetimibe			100mg of lovastatin; 21mg ezetimibe	Lovastatin and ezetimibe	Combination	3.5	12	6.5										0.124	0.0226	6	0.169	0.0113	6
3110	Gao 2013	Resveratrol Suppresses T0901317-Induced Hepatic Fat Accumulation in Mice	LXRα ligand T0901319	LXRα ligand T0901319	C57BL/6?	C57BL/6?	1	0	0	0	1					M	Gao 2013	Resveratrol	200	mg/kg	200 mg/kg/day	Polyphenol (Resveratrol)	Polyphenol (Resveratrol)		0.71					6.6	8.4	0.785714				0.0195473	0.0011299	5	0.0240669	0.00192083	5
3289	Yao 2014	FXR agonist GW4064 alleviates endotoxin-induced hepatic inflammation by repressing macrophage activation	High Fat Diet / HFD + LPS	High Fat Diet / HFD + LPS	C57BL/6?	C57BL/6?	1	0	1	0	2				59	M	Yao 2014	GW4064	30	mg/kg	30 mg/kg	GW4064	FXR agonist	3.5	1	3.75
3364	Xu 2012	Supplementation with probiotics modifies gut flora and attenuates liver fat accumulation in rat nonalcoholic fatty liver disease	High Fat Diet / HFD	High Fat Diet / HFD	Sprague Dawley	Sprague Dawley	1	1	0	0	2			10	76	M	Xu 2012_2	Bifidobacterium longum			10^10/ml water	Bifidobacterium longum	Bifidobacterium sp.	1.45678	12	4.45678										0.11299	0.033897	10	0.180784	0.033897	5
3364	Xu 2012	Supplementation with probiotics modifies gut flora and attenuates liver fat accumulation in rat nonalcoholic fatty liver disease	High Fat Diet / HFD	High Fat Diet / HFD	Sprague Dawley	Sprague Dawley	1	1	0	0	2			10	76	M	Xu 2012_1	Lactobacillus acidophilus			10^10/ml water	Lactobacillus acidophilus	Lactobacillus sp.	1.45678	12	4.45678										0.158186	0.022598	10	0.180784	0.033897	5
3480	Okada 2017	Peretinoin, an acyclic retinoid, suppresses steatohepatitis and tumorigenesis by activating autophagy in mice fed an atherogenic high-fat diet	High Fat + High Cholesterol Diet	High Fat + High Cholesterol Diet	C57BL/6J	C57BL/6J	1	1	0	0	2	1.3			59	M	Okada 2017_1	Peretinoin	0.02	%	.01, 0.03%	Retinoid (Peretinoin)	Peretinoin	2	12	5										0.0610146	0.00508455	12	0.152536	0.0135588	6
3480	Okada 2017	Peretinoin, an acyclic retinoid, suppresses steatohepatitis and tumorigenesis by activating autophagy in mice fed an atherogenic high-fat diet	High Fat + High Cholesterol Diet	High Fat + High Cholesterol Diet	C57BL/6J	C57BL/6J	1	1	0	0	2	1.3			59	M	Okada 2017_3	Peretinoin	0.02	%	.01, 0.03%	Retinoid (Peretinoin)	Peretinoin	2	60	17										0.0734435	0.0248578	12	0.0960415	0.0474558	6
3480	Okada 2017	Peretinoin, an acyclic retinoid, suppresses steatohepatitis and tumorigenesis by activating autophagy in mice fed an atherogenic high-fat diet	High Fat + High Cholesterol Diet	High Fat + High Cholesterol Diet	C57BL/6J	C57BL/6J	1	1	0	0	2	1.3			59	M	Okada 2017_2	Peretinoin	0.02	%	.01, 0.03%	Retinoid (Peretinoin)	Peretinoin	2	30	9.5										0.135588	0.0305073	12	0.192083	0.0361568	6
3501	Li 2017b	Salidroside Modulates Insulin Signaling in a Rat Model of Nonalcoholic Steatohepatitis	High Fat + High Cholesterol Diet	High Fat + High Cholesterol Diet	Sprague Dawley	Sprague Dawley	1	1	0	0	2	2			22	M	Li 2017b	Rosiglitazone	0.4	mg/kg	0.4 mg/kg	Thiazolidinediones (Rosiglitazone)	Thiazolidinediones		5					4.22	5.58	0.756272	151.32	217.2	0.696685	0.116719	0.0611364	8	0.157598	0.0799599	8
3531	Imai 2017	Hepatocyte-Specific Depletion of Ubiquitin Regulatory X Domain Containing Protein 8 Accelerates Fibrosis in a Mouse Non-Alcoholic Steatohepatitis Model.	Choline deficient HFD	Choline deficient HFD	C57BL/6J	C57BL/6J	1	0	0	0	1				60	Both	Imai 2017_1	Losartan	2	mg/kg	2 mg/kg/day	ARB (Losartan)	Angiotensin Receptor Blocker	7.5	2	8
3531	Imai 2017	Hepatocyte-Specific Depletion of Ubiquitin Regulatory X Domain Containing Protein 8 Accelerates Fibrosis in a Mouse Non-Alcoholic Steatohepatitis Model.	U8-HKO + Choline deficient HFD	U8-HKO + Choline deficient HFD	C57BL/6N-CBA	Mixed	1	0	0	0	1				60	Both	Imai 2017_2	Losartan	2	mg/kg	2 mg/kg/day	ARB (Losartan)	Angiotensin Receptor Blocker	7.5	2	8
3623	van der Neen 2016	Pioglitazone attenuates hepatic inflammation and fibrosis in phosphatidylethanolamine N-methyltransferase-deficient mice	High Fat Diet / HFD	High Fat Diet / HFD	C57BL/6?	C57BL/6?	1	0	0	0	1				55	M	van der Neen 2016_1	Pioglitazone	20	mg/kg	20 mg/kg	Thiazolidinediones (Pioglitazone)	Thiazolidinediones	2	10	4.5				5.2	5.3	0.981132				0.203382	0.0415125	6	0.248578	0.0276826	6
3623	van der Neen 2016	Pioglitazone attenuates hepatic inflammation and fibrosis in phosphatidylethanolamine N-methyltransferase-deficient mice	Pemt-/- + HFD	Pemt-/- + HFD	C57BL/6?	C57BL/6?	1	0	0	0	1				55	M	van der Neen 2016_2	Pioglitazone	20	mg/kg	20 mg/kg	Thiazolidinediones (Pioglitazone)	Thiazolidinediones	2	10	4.5				4.8	5.2	0.923077				0.85	0.07348	6	0.995	0.04999	6
3693	Wu 2016	Inflammatory Stress Sensitizes the Liver toAtorvastatin-Induced Injury in ApoE-/- Mice	ApoE knockout (ApoE -/-) + Western Diet	ApoE knockout (ApoE -/-) + Western Diet	C57BL/6?	C57BL/6?	1	1	0	0	2				41	M	Wu 2016	Atorvastatin	10	mg/kg	10mg/kg/day	Statin (Atorvastatin)	Statin	2.25	8	4.25										0.033897	0.00169485	6	0.0259877	0.0011299	6
3721	Plaza-Diaz 2014	Effects of Lactobacillus paracasei CNCM I-4034, Bifidobacterium breve CNCM I-4035 and Lactobacillus rhamnosus CNCM I-4036 on Hepatic Steatosis in Zucker Rats	Zucker	Zucker	Zucker	Zucker	1	1	1	0	3					M	Plaza-Diaz 2014_1	B. breve			10^10 cfu	B. breve	Bifidobacterium sp.	1.67857	4.28571	2.75				12.7484	16.1006	0.791796	525	510	1.02941	0.593198	0.159792	8	0.875672	0.159792	2
3721	Plaza-Diaz 2014	Effects of Lactobacillus paracasei CNCM I-4034, Bifidobacterium breve CNCM I-4035 and Lactobacillus rhamnosus CNCM I-4036 on Hepatic Steatosis in Zucker Rats	Zucker	Zucker	Zucker	Zucker	1	1	1	0	3					M	Plaza-Diaz 2014_2	L. paracasei			10^10 cfu	L. paracasei	Lactobacillus sp.	1.67857	4.28571	2.75				13.4976	16.1006	0.838332	585	510	1.14706	0.593198	0.159792	8	0.875672	0.159792	2
3721	Plaza-Diaz 2014	Effects of Lactobacillus paracasei CNCM I-4034, Bifidobacterium breve CNCM I-4035 and Lactobacillus rhamnosus CNCM I-4036 on Hepatic Steatosis in Zucker Rats	Zucker	Zucker	Zucker	Zucker	1	1	1	0	3					M	Plaza-Diaz 2014_3	L. rhamnosus			10^10 cfu	L. rhamnosus	Lactobacillus sp.	1.67857	4.28571	2.75				14.8296	16.1006	0.921062	570	510	1.11765	0.593198	0.159792	8	0.875672	0.159792	2
3721	Plaza-Diaz 2014	Effects of Lactobacillus paracasei CNCM I-4034, Bifidobacterium breve CNCM I-4035 and Lactobacillus rhamnosus CNCM I-4036 on Hepatic Steatosis in Zucker Rats	Zucker	Zucker	Zucker	Zucker	1	1	1	0	3					M	Plaza-Diaz 2014_4	Mixture			10^10 cfu	Mixture	Probiotic (mix)	1.67857	4.28571	2.75				15.1349	16.1006	0.940021	390	510	0.764706	0.593198	0.159792	8	0.875672	0.159792	2
3872	Pathil 2011	Ursodeoxycholyl Lysophosphatidylethanolamide Improves Steatosis and Inflammation in Murine Models of Nonalcoholic Fatty Liver Disease	Methionine and choline deficient diet / MCD	Methionine and choline deficient diet / MCD	C57BL/6?	C57BL/6?	1	0	1	0	2					M	Pathil 2011_4	UDCA-LPE	12.9	mg/kg	12.9 mg/kg	UCDA	UCDA	2.5	1.5	2.875										0.316372	0.0357274	10	0.587548	0.142921	10
3872	Pathil 2011	Ursodeoxycholyl Lysophosphatidylethanolamide Improves Steatosis and Inflammation in Murine Models of Nonalcoholic Fatty Liver Disease	High Fat Diet / HFD	High Fat Diet / HFD	C57BL/6?	C57BL/6?	1	0	1	0	2				60	M	Pathil 2011_2	UDCA-LPE	12.9	mg/kg	12.9 mg/kg	UCDA	UCDA	7.5	2	8										0.327671	0.0159768	8	0.480207	0.0798952	8
3875	Patel 2013	Combination of omeprazole with GLP-1 agonist therapy improves insulin sensitivity and antioxidant activity in liver in type 1 diabetic mice	STZ	STZ	C57BLKS/J	C57BLKS/J	1	0	0	0	1					M	Patel 2013_1	Exendin-4	0.008	mg/kg	0.008 mg/kg exendin-4	GLP-1 agonist (Exenatide)	GLP-1 agonist	3	4	4				16.3725	22.4775	0.728395				0.011073	0.00414673	6	0.0180784	0.00414673	6
3893	Ong 2010	Adipose Triglyceride Lipase Is a Major Hepatic Lipase That Regulates Triacylglycerol Turnover and Fatty Acid Signaling and Partitioning	ATGL knockdown + HFD	ATGL knockdown + HFD	C57BL/6?	C57BL/6?	1	0	0	0	1				42	M	Ong 2010	Fenofibrate	125	mg/kg	125 mg/kg	Fibrate (Fenofibrate)	Fibrates	2.25	0.86	2.465										0.203382	0.0553536	6	0.271176	0.0835477	8
3920	Li 2016b	Sirtuin 3 (SIRT3) Regulates a-Smooth Muscle Actin (a-SMA) Production through the Succinate Dehydrogenase-G Protein-coupled Receptor 91 (GPR91) Pathway in Hepatic Stellate Cells	Methionine and choline deficient diet / MCD	Methionine and choline deficient diet / MCD	C57BL/6J	C57BL/6J	0	0	0	0	0					M	Li 2016b	Resveratrol	100	mg/kg	100 mg/kg/day	Polyphenol (Resveratrol)	Polyphenol (Resveratrol)	1.75	4	2.75										0.045196	0.00958752	8	0.0937817	0.0067794	4
3927	Meng 2016b	Liver MicroRNA-291b-3p Promotes Hepatic Lipogenesis through Negative Regulation of Adenosine 5􏰝- Monophosphate (AMP)-activated Protein Kinase a1	High Fat Diet / HFD	High Fat Diet / HFD	C57BL/6J	C57BL/6J	1	0	0	0	1				45	M	Meng 2016b	Metformin	3	mg/kg	3 mg/kg/day	Metformin	Biguanide		8											0.045196	0.0203382	4	0.0762682	0.022598	4
4003	Miyaki 2011	Pitavastatin inhibits hepatic steatosis and fibrosis in non-alcoholic steatohepatitis model rats	Methionine and choline deficient diet / MCD	Methionine and choline deficient diet / MCD	Wistar	Wistar	1	1	0	0	2					M	Miyaki 2011_1	Pitavastatin	5	mg/kg	5 mg/kg	Statin (Pitavastatin)	Statin	1.5	2	2										0.475349	0.11186	8	0.629354	0.0824827	8
4085	Inui 1990	Inhibitory Effect of a New Alpha-Glucosidase Inhibitor on Fatty Liver in Zucker Fatty Rats	Zucker	Zucker	Zucker	Zucker	0	0	0	0	0					F	Inui 1990_1	AO-128	30	mg/kg	10, 50 mg/kg diet	AO-128	Alpha glucosidase inhibitor	3.5	10	6										0.0575	0.025	13	0.083	0.01	7
4154	Schaalan 2009	Westernized-Like-Diet-Fed Rats Effect on Glucose Homeostasis, Lipid Profile, and Adipocyte Hormones and Their Modulation by Rosiglitazone and Glimepiride	High fat diet + high fructose + STZ	High fat diet + high fructose + STZ	Wistar	Wistar	0	1	0	0	1				22	M	Schaalan 2009	Rosiglitazone	4	mg/kg	4 mg/kg	Thiazolidinediones (Rosiglitazone)	Thiazolidinediones		2					6.1605	17.0041	0.362295	210.84	268.8	0.784375	0.227223	0.0416933	12	0.219314	0.0110843	12
4161	Yang 2011b	Effect of Berberine on Expressions of Uncoupling Protein-2 mRNA and Protein in Hepatic Tissue of Non-alcoholic Fatty Liver Disease in Rats	High Fat + High Cholesterol Diet	High Fat + High Cholesterol Diet	Sprague Dawley	Sprague Dawley	0	1	0	0	1	1.5			22	M	Yang 2011b_1	Berberine	243	mg/kg	162, 324 mg/kg	Berberine	Berberine	1.60028	12	4.60028										0.00243493	0.00067794	20	0.00404504	0.000655342	10
4261	Uto 2005	The perioxsome proliferator-activated receptor-gamma agonist, pioglitazone, inhibits fat accumulation and fiborisis in the livers of rats fed a choline-deficient, L-amino acid-defined diet	Choline-deficient L-amino-defined diet / CDAA	Choline-deficient L-amino-defined diet / CDAA	F344	F344	1	1	0	0	2					M	Uto 2005	Pioglitazone	1	mg/kg	1 mg/kg	Thiazolidinediones (Pioglitazone)	Thiazolidinediones	2	1	2.25				9.435	8.325	1.13333	75	187.5	0.4	0.44631	0.011299	4	0.418063	0.0135588	4
4268	Wu 2011	Pharmacological activation of peroxisome proliferator-activated receptor delta improves insulin resistance and hepatic stetaosis in high fat diet-induced diabetic mice	High Fat Diet / HFD	High Fat Diet / HFD	C57BL/6J	C57BL/6J	0	0	0	0	0				60	M	Wu 2011	L165041 (PPARdelta agonist)	0.002	mg/kg	0.002 mg/kg	L165041 (PPARdelta agonist)	PPARalpha-delta agonist	2	12	5				9.99	12.4875	0.8				0.0135588	0.0011299	7	0.0192083	0.00282475	7
4318	Nakagami 2013	Rosuvastatin ameliorates obesity and proteinuria in Zucker diabetic fatty rats	Zucker	Zucker	Zucker	Zucker	1	0	0	0	1						Nakagami 2013_2	Atorvastatin	10	mg/kg	10 mg/kg	Statin (Atorvastatin)	Statin	3	12	6										0.0231629	0.00282475	6	0.0248578	0.0022598	3
4318	Nakagami 2013	Rosuvastatin ameliorates obesity and proteinuria in Zucker diabetic fatty rats	Zucker	Zucker	Zucker	Zucker	1	0	0	0	1						Nakagami 2013_1	Rosuvastatin	10	mg/kg	10 mg/kg	Statin (Rosuvastatin)	Statin	3	12	6										0.022033	0.0022598	6	0.0248578	0.0022598	3
4567	Zhang 2018	Activation of hepatic Nogo-B receptor expression-A new anti-liver steatosis mechanism of statins	ApoE knockout (ApoE -/-) + Western Diet	ApoE knockout (ApoE -/-) + Western Diet	Not stated	Not stated	1	1	0	0	2	0.5			42	M	Zhang 2018	Atorvastatin	15	mg/kg	15mg/kg/day	Statin (Atorvastatin)	Statin	2	2	2.5										0.33897	0.221404	6	0.519754	0.304395	6
4684	Roth 2018	INT-767 improves histopathological features in a diet-induced ob/ob mouse model of biopsy-confirmed non-alcoholic steatohepatitis	Leptin Deficiency (ob/ob) + FFC	Leptin Deficiency (ob/ob) + FFC	B6.V-Lepob/JRj	B6.V-Lepob	0	0	1	0	1	2	20		40	M	Roth 2018_3	Obetacholic acid	20	mg/kg	10, 30 mg/kg	FXR agonist (Obetacholic acid)	FXR agonist	3.75	16	7.75
4684	Roth 2018	INT-767 improves histopathological features in a diet-induced ob/ob mouse model of biopsy-confirmed non-alcoholic steatohepatitis	Leptin Deficiency (ob/ob) + FFC	Leptin Deficiency (ob/ob) + FFC	B6.V-Lepob/JRj	B6.V-Lepob	0	0	1	0	1	2	20		40	M	Roth 2018_2	INT-767	6.5	mg/kg	3, 10 mg/kg	FXR/TGR5 agonist (INT-767)	FXR agonist	3.75	16	7.75
4695	Ma 2018a	Functional interplay between liver X receptor and AMP-activated protein kinase alpha inhibits atherosclerosis in apolipoprotein E-deficient mice - a new anti-atherogenic strategy	GW3965 (LXR agonist)	GW3965 (LXR agonist)	C57BL/6J	C57BL/6J	1	1	1	0	3					M	Ma 2018a_3	Metformin	100	mg/kg	100mg/kg	Metformin	Biguanide	2.25	2	2.75										0.0711837	0.022146	6	0.166095	0.0166095	6
4856	Yi 2018	Rho, a Fraction From Rhodiola crenulate, Ameliorates Hepatic Steatosis in Mice Models	High Fat Diet / HFD	High Fat Diet / HFD	C57BL/6?	C57BL/6?	1	1	0	0	2				50	M	Yi 2018	Fluvastatin	50	mg/kg	50mg/kg	Statin (Fluvastatin)	Statin	4	5	5.25										0.79093	0.361568	8	1.03951	0.11299	8
4991	Goedeke 2018	Acetyl-CoA Carboxylase Inhibition Reverses NAFLD and Hepatic Insulin Resistance but Promotes Hypertriglyceridemia in Rodents	Fast food diet	Fast food diet	C57BL/6J	C57BL/6J	1	1	1	1	4	2	23.1		40	M	Goedeke 2018_1	ACCi	17.3333	mg/kg	2, 10, 40 mg/kg	ACC inhibitor	ACC inhibitor	3	4	4										0.0823333	0.0255756	21	0.17	0.0264575	7
4992	Rodriguez-Cuenca 2018	P465L-PPARG mutation confers partial resistance to the hypolipidaemic action of fibrates	High Fat Diet / HFD	High Fat Diet / HFD	C57/BL/6J-129/SvJ	Mixed	1	0	0	0	1				45		Rodriguez-Cuenca 2018	WY14643	25	mg/kg	25 mg/kg	WY14643	Fibrates	7	0.714286	7.17857				17.5	19	0.921053	112.5	90	1.25	0.000960415	0.000146887	7	0.00101691	0.000158186	8
5051	Zhou 2018	Rapamycin improves insulin resistance and hepatic steatosis in type 2 diabetes rats through activation of autophagy	HFD + STZ	HFD + STZ	Sprague Dawley	Sprague Dawley	1	1	0	0	2				45	M	Zhou 2018	Metformin	200	mg/kg	200 mg/kg	Metformin	Biguanide	4.25	12	7.25				9.18	20.39	0.450221	104.82	171.24	0.612123	1.9	0.2	15	2.7	0.2	15
5128	Zhao 2018b	Polydatin prevents fructose-induced liver inflammation and lipid deposition through increasing miR-200a to regulate Keap1/Nrf2 pathway	Fructose	High fructose	Sprague Dawley	Sprague Dawley	1	1	0	0	2		10			M	Zhao 2018b	Pioglitazone	4	mg/kg	4mg/kg	Thiazolidinediones (Pioglitazone)	Thiazolidinediones	3.5	7	5.25										0.096	0.021	7	0.207	0.037	7
5291	Iida 2018	Discovery of potent liver-selective stearoyl-CoA desaturase-1 (SCD1) inhibitors, thiazole-4-acetic acid derivatives, for the treatment of diabetes, hepatic steatosis, and obesity	High sucrose, very low fat	High sucrose, very low fat	Sprague Dawley	Sprague Dawley	0	0	0	0	0					M	Iida 2018_1	Novel SCD1 inhibtor	5.5	mg/kg	1, 10mg/kg	SCD-1 inhibitor	SCD-1 inhibitor	1.5	1.14286	1.78571										0.0305073	0.0079093	12	0.090392	0.0282475	6
5374	Valdecantos 2018	Differential Effects of a Glucagon-Like Peptide 1 Receptor Agonist in Non-Alcoholic Fatty Liver Disease and in Response to Hepatectomy	Methionine and choline deficient diet / MCD	Methionine and choline deficient diet / MCD	C57BL/6?	C57BL/6?	1	1	1	0	3					M	Valdecantos 2018_2	GLP-1R agonist			10 nmol/kg every 2 days	GLP-1R agonist	GLP-1 agonist	2	3	2.75										0.12217	0.0233776	8	0.192083	0.0444842	8
[truncated: 32 more columns]
