# Supplementary material for: Weight loss, insulin resistance, and study design confound results in a meta-analysis of animal models of fatty liver
Source: eLife. 2020 Oct 16;9:e56573. doi: 10.7554/eLife.56573 (PMC7647398; doi:10.7554/eLife.56573)
Supplement: Figure 2—source data 1. — Tab 1. Results from meta-analysis of hepatic triglyceride with subgroup by drug class. Tab 2. Results from meta-analysis of hepatic triglyceride with subgroup by individual drug. Tab 3. Results from meta-analysis of hepatic triglyceride with subgroup by drug class, after removal of outlier studies. Tab 4. Results from univariable meta-regression analyses. Tab 5. Results from model 1 (without drug) and model 2 (including drug used) multivariable meta-regression analyses. [file elife-56573-fig2-data1.xlsx]

## Sheet: TG_metan_class
	Drug class	k (cohorts)	Number of animals			Heterogeneity				Effect estimate
			Controls	Interventional	Total	I^2	Tau	Q	Pq	MD (95% CI)	Pz
	Alpha glucosidase inhibitor	4	23	39	62	0.785634	30.9	13.9948	0.0029	-40.0 ( -95.2, 15.3)	0.1
	Angiotensin Receptor Blocker	18	113	146	259	0.68334	16.6	53.6854	1.1e-05	-31.8 ( -41.8, -21.8)	3.7e-06
	Berberine	9	68	110	178	0.225537	8.9	10.3297	0.24	-27.6 ( -36.4, -18.7)	9.5e-05
	Bifidobacterium sp.	4	19	40	59	0	3.2	0.799642	0.85	-41.3 ( -53.0, -29.6)	0.0015
	Biguanide	36	293	333	626	0.894251	22.4	330.971	7.1e-50	-27.1 ( -35.6, -18.5)	2.3e-07
	Cholesterol Absorption Inhibitor	16	89	165	254	0.841555	21.1	94.6702	1.3e-13	-29.5 ( -42.8, -16.2)	0.00027
	Curcumin	7	58	86	144	0.566738	9.3	13.8484	0.031	-38.3 ( -49.4, -27.2)	0.00015
	Docosahexaenoic acid	3	22	36	58	0.804077	17	10.2081	0.0061	-18.8 ( -67.7, 30.1)	0.24
	DPP4 inhibitor	11	85	126	211	0.230665	9.6	12.9982	0.22	-41.1 ( -50.5, -31.7)	2e-06
	Eicosapentaenoic acid	13	101	157	258	0.794738	20.4	58.4619	4.3e-08	-37.5 ( -50.9, -24.1)	5.4e-05
	Fibrates	44	310	391	701	0.820374	23.4	239.386	4.5e-29	-41.8 ( -49.9, -33.7)	2.8e-13
	FXR agonist	16	187	203	390	0.778532	19.8	67.73	1.1e-08	-30.1 ( -42.4, -17.8)	0.00011
	GLP-1 agonist	35	257	316	573	0.788445	11.5	160.715	2.3e-18	-31.8 ( -36.9, -26.7)	1.9e-14
	Lactobacillus sp.	8	49	83	132	0	9.3	5.14711	0.64	-25.1 ( -36.0, -14.2)	0.00094
	LXR inhibition	4	29	58	87	0.977097	80.6	130.988	3.3e-28	9.7 (-120.3, 139.8)	0.83
	Omega-3 polyunsaturated fatty acids (mix)	20	179	193	372	0.848078	17.4	125.064	1.2e-17	-44.7 ( -54.8, -34.5)	2.1e-08
	PDE inhibitor (Pentoxifylline)	4	34	57	91	0.879581	28.3	24.9131	1.6e-05	4.1 ( -44.1, 52.3)	0.8
	Polyphenol (Resveratrol)	21	175	217	392	0.913571	15.6	231.403	6.3e-38	-32.1 ( -40.6, -23.6)	1.4e-07
	PPARalpha-delta agonist	9	84	96	180	0.119247	8.6	9.08314	0.34	-29.6 ( -38.2, -21.0)	4.5e-05
	Probiotic (mix)	7	46	53	99	0.894016	59.3	56.6125	2.2e-10	-4.7 ( -64.4, 55.0)	0.85
	SCD-1 inhibitor	4	28	54	82	0.705699	22.5	10.1937	0.017	-59.8 (-103.0, -16.6)	0.022
	SGLT2 inhibitor	9	57	81	138	0.847353	29	52.4086	1.4e-08	-30.0 ( -54.9, -5.2)	0.024
	Silymarin	8	56	92	148	0.227834	11.8	9.06541	0.25	-36.4 ( -48.0, -24.9)	0.00014
	Statin	43	225	374	599	0.939166	21.4	690.404	3e-118	-27.5 ( -35.3, -19.6)	1.2e-08
	Tauroursodeoxycholic acid (TUDCA)	6	48	91	139	0.899493	21.7	49.7479	1.6e-09	-35.1 ( -62.4, -7.8)	0.021
	Thiazolidinediones	59	373	461	834	0.932552	40.6	859.923	3.6e-143	-15.6 ( -26.8, -4.4)	0.0071
	Vitamin D	4	33	33	66	0.749538	21.4	11.9779	0.0075	-29.3 ( -67.2, 8.6)	0.091
	Vitamin E	6	31	37	68	0	6.8	2.94798	0.71	-16.8 ( -25.7, -7.8)	0.0048
	Overall	428	3072	4128	7200	0.895772	26	4096.8	0	-29.9 ( -32.6, -27.1)	2.8e-69

## Sheet: TG_metan_drug
	Drug	k (cohorts)	Number of animals			Heterogeneity				Effect estimate
			Controls	Interventional	Total	I^2	Tau	Q	Pq	MD (95% CI)	Pz
	ARB (Olmesartan)	6	50	52	102	0.652685	16.1	14.3962	0.013	-33.3 (-53.7, -13.0)	0.0084
	ARB (Telmisartan)	6	31	43	74	0.791867	20.2	24.0231	0.00021	-34.4 (-59.9, -8.9)	0.018
	Berberine	9	68	110	178	0.225537	8.9	10.3297	0.24	-27.6 (-36.4, -18.7)	9.5e-05
	Curcumin	7	58	86	144	0.566738	9.3	13.8484	0.031	-38.3 (-49.4, -27.2)	0.00015
	Docosahexaenoic acid	3	22	36	58	0.804077	17	10.2081	0.0061	-18.8 (-67.7, 30.1)	0.24
	Eicosapentaenoic acid	13	101	157	258	0.794738	20.4	58.4619	4.3e-08	-37.5 (-50.9, -24.1)	5.4e-05
	Ezetimibe	16	89	165	254	0.841555	21.1	94.6702	1.3e-13	-29.5 (-42.8, -16.2)	0.00027
	Fibrate (Bezafibrate)	8	47	87	134	0.814116	24.2	37.6579	3.5e-06	-40.7 (-63.2, -18.1)	0.0037
	Fibrate (Fenofibrate)	34	245	287	532	0.797515	22.6	162.975	4e-19	-42.1 (-51.2, -33.0)	7.8e-11
	FXR agonist (Obetacholic acid)	8	116	132	248	0.810939	26.8	37.025	4.6e-06	-27.6 (-53.0, -2.2)	0.037
	GLP-1 agonist (Exenatide)	23	168	202	370	0.832104	10.9	131.034	1.7e-17	-28.8 (-34.9, -22.7)	1.7e-09
	GLP-1 agonist (Liraglutide)	6	44	59	103	0.173246	13.2	6.04775	0.3	-40.8 (-58.8, -22.8)	0.0021
	Metformin	36	293	333	626	0.894251	22.4	330.971	7.1e-50	-27.1 (-35.6, -18.5)	2.3e-07
	PDE inhibitor (Pentoxifylline)	4	34	57	91	0.879581	28.3	24.9131	1.6e-05	4.1 (-44.1, 52.3)	0.8
	Polyphenol (Resveratrol)	21	175	217	392	0.913571	15.6	231.403	6.3e-38	-32.1 (-40.6, -23.6)	1.4e-07
	PUFA (Fish oil)	11	95	96	191	0.880906	20.6	83.9669	8.3e-14	-45.0 (-61.6, -28.5)	0.00012
	PUFA (Omega-3 supplement)	7	68	81	149	0.837109	16.2	36.8345	1.9e-06	-43.1 (-62.2, -24.1)	0.0015
	Silymarin	6	40	66	106	0.286405	14.2	7.00678	0.22	-34.0 (-50.3, -17.8)	0.003
	Statin (Atorvastatin)	12	62	102	164	0.941867	23.9	189.222	1.3e-34	-22.9 (-41.9, -3.9)	0.022
	Statin (Fluvastatin)	7	32	46	78	0.656681	18.5	17.4765	0.0077	-28.6 (-50.1, -7.0)	0.018
	Statin (Pitavastatin)	5	36	54	90	0.753888	23.1	16.2528	0.0027	-27.2 (-59.7, 5.2)	0.08
	Statin (Rosuvastatin)	6	24	45	69	0.918375	30.2	61.2561	6.7e-12	-20.4 (-56.0, 15.2)	0.2
	Statin (Simvastatin)	10	57	99	156	0.639097	14.7	24.9374	0.003	-37.9 (-50.8, -25.0)	9.6e-05
	Tauroursodeoxycholic acid (TUDCA)	6	48	91	139	0.899493	21.7	49.7479	1.6e-09	-35.1 (-62.4, -7.8)	0.021
	Thiazolidinediones (Pioglitazone)	30	197	232	429	0.926522	45.3	394.677	8.9e-66	-11.8 (-29.3, 5.6)	0.18
	Thiazolidinediones (Rosiglitazone)	25	153	204	357	0.92055	36.1	302.076	6.4e-50	-19.7 (-35.8, -3.5)	0.019
	Vitamin D	4	33	33	66	0.749538	21.4	11.9779	0.0075	-29.3 (-67.2, 8.6)	0.091
	Vitamin E	6	31	37	68	0	6.8	2.94798	0.71	-16.8 (-25.7, -7.8)	0.0048
	Overall	335	2417	3209	5626	0.907232	25.2	3600.39	0	-29.5 (-32.5, -26.5)	3.7e-56

## Sheet: TG_metan_class_NoOutlier
	Drug class	k (cohorts)	Number of animals			Heterogeneity				Effect estimate
			Controls	Interventional	Total	I^2	Tau	Q	Pq	MD (95% CI)	Pz
	Alpha glucosidase inhibitor	4	23	39	62	0.785634	30.9	13.9948	0.0029	-40.0 ( -95.2, 15.3)	0.0029
	Angiotensin Receptor Blocker	18	113	146	259	0.68334	16.6	53.6854	1.1e-05	-31.8 ( -41.8, -21.8)	1.1e-05
	Berberine	9	68	110	178	0.225537	8.9	10.3297	0.24	-27.6 ( -36.4, -18.7)	0.24
	Bifidobacterium sp.	3	15	26	41	0	3.5	0.790594	0.67	-41.2 ( -60.5, -21.9)	0.67
	Biguanide	34	263	298	561	0.900169	22.9	330.56	8.5e-51	-26.9 ( -35.8, -18.0)	8.5e-51
	Cholesterol Absorption Inhibitor	16	89	165	254	0.841555	21.1	94.6702	1.3e-13	-29.5 ( -42.8, -16.2)	1.3e-13
	Curcumin	7	58	86	144	0.566738	9.3	13.8484	0.031	-38.3 ( -49.4, -27.2)	0.031
	Docosahexaenoic acid	3	22	36	58	0.804077	17	10.2081	0.0061	-18.8 ( -67.7, 30.1)	0.0061
	DPP4 inhibitor	11	85	126	211	0.230665	9.6	12.9982	0.22	-41.1 ( -50.5, -31.7)	0.22
	Eicosapentaenoic acid	13	101	157	258	0.794738	20.4	58.4619	4.3e-08	-37.5 ( -50.9, -24.1)	4.3e-08
	Fibrates	44	310	391	701	0.820374	23.4	239.386	4.5e-29	-41.8 ( -49.9, -33.7)	4.5e-29
	FXR agonist	16	187	203	390	0.778532	19.8	67.73	1.1e-08	-30.1 ( -42.4, -17.8)	1.1e-08
	GLP-1 agonist	35	257	316	573	0.788445	11.5	160.715	2.3e-18	-31.8 ( -36.9, -26.7)	2.3e-18
	Lactobacillus sp.	7	46	69	115	0	10.1	5.09574	0.53	-25.3 ( -37.5, -13.0)	0.53
	LXR inhibition	4	29	58	87	0.977097	80.6	130.988	3.3e-28	9.7 (-120.3, 139.8)	3.3e-28
	Omega-3 polyunsaturated fatty acids (mix)	20	179	193	372	0.848078	17.4	125.064	1.2e-17	-44.7 ( -54.8, -34.5)	1.2e-17
	PDE inhibitor (Pentoxifylline)	4	34	57	91	0.879581	28.3	24.9131	1.6e-05	4.1 ( -44.1, 52.3)	1.6e-05
	Polyphenol (Resveratrol)	20	167	209	376	0.842911	13.9	120.95	7.4e-17	-29.7 ( -37.7, -21.7)	7.4e-17
	PPARalpha-delta agonist	9	84	96	180	0.119247	8.6	9.08314	0.34	-29.6 ( -38.2, -21.0)	0.34
	Probiotic (mix)	6	31	38	69	0.911672	65.4	56.6075	6.1e-11	-3.9 ( -76.2, 68.5)	6.1e-11
	SCD-1 inhibitor	4	28	54	82	0.705699	22.5	10.1937	0.017	-59.8 (-103.0, -16.6)	0.017
	SGLT2 inhibitor	9	57	81	138	0.847353	29	52.4086	1.4e-08	-30.0 ( -54.9, -5.2)	1.4e-08
	Silymarin	8	56	92	148	0.227834	11.8	9.06541	0.25	-36.4 ( -48.0, -24.9)	0.25
	Statin	42	219	368	587	0.762758	19.3	172.819	4.1e-18	-29.7 ( -36.9, -22.4)	4.1e-18
	Tauroursodeoxycholic acid (TUDCA)	6	48	91	139	0.899493	21.7	49.7479	1.6e-09	-35.1 ( -62.4, -7.8)	1.6e-09
	Thiazolidinediones	57	361	452	813	0.91499	41.2	658.743	8.6e-104	-16.4 ( -28.0, -4.8)	8.6e-104
	Vitamin D	4	33	33	66	0.749538	21.4	11.9779	0.0075	-29.3 ( -67.2, 8.6)	0.0075
	Vitamin E	6	31	37	68	0	6.8	2.94798	0.71	-16.8 ( -25.7, -7.8)	0.71
	Overall	419	2994	4027	7021	0.86727	25.9	3149.26	0	-30.2 ( -32.9, -27.4)	0

## Sheet: TG_univariable
Analysis	Variable	Beta (SE)	p-value	AdjR^2	k
TG_univariate	Sex		0.6	0	455
TG_univariate	Female sex	7.2 (14.6)	0.62	-	455
TG_univariate	Male sex	2.0 (13.8)	0.88	-	455
TG_univariate	Background (simplified)		0.14	1	448
TG_univariate	C57BL/6?	-13.1 (7.2)	0.069	-	448
TG_univariate	C57BL/6J	-8.0 (6.9)	0.25	-	448
TG_univariate	C57BL/6N	-11.8 (11.6)	0.31	-	448
TG_univariate	C57BLKS/J	-10.3 (13.3)	0.44	-	448
TG_univariate	F344	-11.6 (13.3)	0.39	-	448
TG_univariate	ICR	-30.4 (9.6)	0.0017	-	448
TG_univariate	KK-Ay	4.2 (12.3)	0.73	-	448
TG_univariate	Long Evans	-17.2 (9.4)	0.068	-	448
TG_univariate	Mixed	-17.2 (12.5)	0.17	-	448
TG_univariate	Not stated	-7.9 (8.5)	0.36	-	448
TG_univariate	Sprague Dawley	-15.8 (7.4)	0.032	-	448
TG_univariate	Wistar	-11.1 (7.3)	0.13	-	448
TG_univariate	Model (simplified)		0.18	1.5	347
TG_univariate	ApoE knockout (ApoE -/-) + Western Diet	5.5 (16.0)	0.73	-	347
TG_univariate	Choline-deficient L-amino-defined diet / CDAA	-5.7 (11.2)	0.61	-	347
TG_univariate	HFD + STZ	-20.2 (12.0)	0.092	-	347
TG_univariate	High calorie diet	-7.2 (15.2)	0.64	-	347
TG_univariate	High Fat + High Cholesterol Diet	-11.9 (7.5)	0.11	-	347
TG_univariate	High Fat + High Fructose Diet	-14.4 (10.5)	0.17	-	347
TG_univariate	High Fat + High Sucrose	-11.4 (8.5)	0.18	-	347
TG_univariate	High Fat Diet / HFD	-9.2 (6.6)	0.17	-	347
TG_univariate	High fat, fructose, cholesterol	-12.2 (11.2)	0.28	-	347
TG_univariate	High fructose	-18.6 (8.7)	0.034	-	347
TG_univariate	KK-Ay	18.4 (15.6)	0.24	-	347
TG_univariate	Leptin Deficiency (ob/ob)	-9.6 (10.8)	0.37	-	347
TG_univariate	Leptin Receptor Deficiency (db/db)	23.1 (13.5)	0.088	-	347
TG_univariate	Leptin Receptor Deficiency (db/db) + MCD	-7.2 (15.7)	0.65	-	347
TG_univariate	Methionine and choline deficient diet / MCD	-11.2 (7.5)	0.14	-	347
TG_univariate	MSG (L-monosodium glutamate) injection	-3.6 (19.0)	0.85	-	347
TG_univariate	Otsuka Long-Evans Tokushima Fatty (OLETF) rat	-28.4 (10.9)	0.0097	-	347
TG_univariate	Western diet	-15.2 (16.7)	0.36	-	347
TG_univariate	(Log) Age at end of intervention	3.9 (2.7)	0.16	0.2	447
TG_univariate	(Log) Age at start of intervention	3.4 (2.4)	0.15	0.2	447
TG_univariate	(Log) Duration of intervention	1.1 (1.5)	0.44	0	471
TG_univariate	(Log) Fat in diet (% kcal)	6.5 (4.6)	0.16	0.3	282
TG_univariate	Cholesterol in diet (% weight)	-1.7 (1.5)	0.25	0.3	94
TG_univariate	(Log) Fructose/glucose in diet (% weight)	0.4 (4.9)	0.94	0	45
TG_univariate	(Log) Sucrose in diet (% kcal)	6.2 (6.9)	0.38	0	34
TG_univariate	(Log) Weight difference interventional/placebo	49.4 (14.3)	0.00064	3.3	327
TG_univariate	(Log) Glucose difference interventional/placebo	7.5 (6.8)	0.27	0	262
TG_univariate	(Log) Insulin difference interventional/placebo	8.1 (4.1)	0.051	1.5	185
TG_univariate	Drug dose (normalised by drug)	-0.1 (2.0)	0.95	0	277
TG_univariate	Drug used		0.021	4.9	335
TG_univariate	ARB (Olmesartan)	-14.2 (15.6)	0.36	-	335
TG_univariate	ARB (Telmisartan)	-16.2 (15.9)	0.31	-	335
TG_univariate	Berberine	-10.6 (14.4)	0.46	-	335
TG_univariate	Curcumin	-19.2 (15.1)	0.2	-	335
TG_univariate	Docosahexaenoic acid	0.9 (19.9)	0.96	-	335
TG_univariate	Eicosapentaenoic acid	-18.7 (13.8)	0.18	-	335
TG_univariate	Ezetimibe	-11.8 (13.4)	0.38	-	335
TG_univariate	Fibrate (Bezafibrate)	-22.2 (14.7)	0.13	-	335
TG_univariate	Fibrate (Fenofibrate)	-23.6 (12.4)	0.058	-	335
TG_univariate	FXR agonist (Obetacholic acid)	-8.3 (15.2)	0.59	-	335
TG_univariate	GLP-1 agonist (Exenatide)	-12.2 (12.7)	0.34	-	335
TG_univariate	GLP-1 agonist (Liraglutide)	-23.4 (16.4)	0.16	-	335
TG_univariate	Metformin	-8.4 (12.4)	0.5	-	335
TG_univariate	PDE inhibitor (Pentoxifylline)	21.9 (17.1)	0.2	-	335
TG_univariate	Polyphenol (Resveratrol)	-13.6 (12.8)	0.29	-	335
TG_univariate	PUFA (Fish oil)	-26.9 (14.1)	0.057	-	335
TG_univariate	PUFA (Omega-3 supplement)	-25.8 (15.5)	0.097	-	335
TG_univariate	Silymarin	-16.6 (15.8)	0.29	-	335
TG_univariate	Statin (Atorvastatin)	-4.6 (14.2)	0.75	-	335
TG_univariate	Statin (Fluvastatin)	-9.2 (15.9)	0.56	-	335
TG_univariate	Statin (Pitavastatin)	-8.6 (16.6)	0.6	-	335
TG_univariate	Statin (Rosuvastatin)	-2.1 (16.0)	0.89	-	335
TG_univariate	Statin (Simvastatin)	-19.4 (14.3)	0.18	-	335
TG_univariate	Tauroursodeoxycholic acid (TUDCA)	-16.5 (16.1)	0.31	-	335
TG_univariate	Thiazolidinediones (Pioglitazone)	6.3 (12.4)	0.61	-	335
TG_univariate	Thiazolidinediones (Rosiglitazone)	-1.4 (12.7)	0.91	-	335
TG_univariate	Vitamin D	-10.9 (17.5)	0.53	-	335
TG_univariate	Quality score	-0.3 (1.7)	0.85	0	474
TG_univariate	Protocol	-0.2 (5.0)	0.97	0	474
TG_univariate	Randomisation	1.5 (2.7)	0.57	0	474
TG_univariate	Blinding	-2.6 (3.1)	0.4	0	474
TG_univariate	Power calculation	-4.4 (10.3)	0.67	0	474
TG_NoWtLoss	(Log) Weight difference interventional/placebo	53.5 (15.2)	0.00049	3.8	297
TG_NoWtLoss	(Log) Glucose difference interventional/placebo	5.4 ( 7.0)	0.44	0	246
TG_NoWtLoss	(Log) Insulin difference interventional/placebo	11.7 (4.5)	0.0097	3.2	175

## Sheet: TG_multivariable
Analysis	Variable	Model 1: Beta (SE)	Model 1: p-value	Model 2: Beta (SE)	Model 2: p-value
TG_multivariate	(Log) Weight difference interventional/placebo	142.0 (44.7)	0.0027	81.7 (101.7)	0.43
TG_multivariate	C57BL/6?	-12.6 (18.8)	0.51	-53.1 (32.9)	0.13
TG_multivariate	C57BL/6J	7.2 (14.3)	0.62	-1.6 (15.8)	0.92
TG_multivariate	C57BL/6N	19.1 (28.7)	0.51	-	-
TG_multivariate	ICR	-17.4 (36.0)	0.63	-	-
TG_multivariate	Mixed	-6.5 (27.6)	0.81	-23.4 (38.6)	0.55
TG_multivariate	Sprague Dawley	-2.0 (17.2)	0.91	-3.0 (21.2)	0.89
TG_multivariate	(Log) Age at start of intervention	17.2 (9.7)	0.081	23.7 (12.9)	0.084
TG_multivariate	(Log) Duration of intervention	10.8 (7.5)	0.16	-	-
TG_multivariate	(Log) Fat in diet (% kcal)	14.3 (20.0)	0.48	25.0 (16.6)	0.15
TG_multivariate	(Log) Glucose difference interventional/placebo	-5.6 (28.5)	0.85	-34.5 (37.5)	0.37
TG_multivariate	(Log) Insulin difference interventional/placebo	0.5 (10.6)	0.97	-0.5 (20.2)	0.98
TG_multivariate	High calorie diet	27.8 (40.3)	0.49	-	-
TG_multivariate	High Fat + High Cholesterol Diet	43.8 (31.6)	0.17	-	-
TG_multivariate	High Fat + High Fructose Diet	16.9 (34.6)	0.63	-	-
TG_multivariate	High Fat + High Sucrose	20.9 (36.1)	0.56	-	-
TG_multivariate	High Fat Diet / HFD	28.1 (29.1)	0.34	-	-
TG_multivariate	High fat, fructose, cholesterol	16.5 (31.0)	0.6	-	-
TG_multivariate	High fructose	19.7 (44.8)	0.66	-	-
TG_multivariate	Quality score	-2.5 (8.2)	0.76	-	-
TG_multivariate	Curcumin	-	-	-6.5 (33.9)	0.85
TG_multivariate	Eicosapentaenoic acid	-	-	-31.9 (40.7)	0.44
TG_multivariate	Ezetimibe	-	-	-3.9 (26.9)	0.89
TG_multivariate	Fibrate (Bezafibrate)	-	-	-23.5 (39.6)	0.56
TG_multivariate	Fibrate (Fenofibrate)	-	-	-25.6 (22.6)	0.27
TG_multivariate	GLP-1 agonist (Exenatide)	-	-	-25.8 (25.7)	0.33
TG_multivariate	GLP-1 agonist (Liraglutide)	-	-	-21.8 (105.2)	0.84
TG_multivariate	Metformin	-	-	3.3 (25.7)	0.9
TG_multivariate	Polyphenol (Resveratrol)	-	-	-37.1 (14.4)	0.02
TG_multivariate	PUFA (Fish oil)	-	-	33.5 (25.5)	0.21
TG_multivariate	PUFA (Omega-3 supplement)	-	-	-21.6 (56.4)	0.71
TG_multivariate	Statin (Atorvastatin)	-	-	-8.4 (116.3)	0.94
TG_multivariate	Statin (Simvastatin)	-	-	-10.1 (14.4)	0.49
TG_multivariate	Tauroursodeoxycholic acid (TUDCA)	-	-	-50.0 (48.2)	0.31
TG_multivariate	Thiazolidinediones (Pioglitazone)	-	-	9.1 (27.8)	0.75
