# Supplementary material for: Weight loss, insulin resistance, and study design confound results in a meta-analysis of animal models of fatty liver
Source: eLife. 2020 Oct 16;9:e56573. doi: 10.7554/eLife.56573 (PMC7647398; doi:10.7554/eLife.56573)
Supplement: Figure 3—source data 1. — Mean, standard deviation, and 95% confidence intervals for the percentage difference in weight, fasting glucose, and fasting insulin between interventional and placebo animals. ACC, acetyl-CoA carboxylase; ACE, angiotensin-2 converting enzyme; CB1, cannabinoid receptor 1; DPP4 Dipeptidyl peptidase-4; FXR, Farnesoid X receptor; GLP-1, glucagon-like peptide-1; LXR, liver X receptor; PDE, phosphodiesterase; PPAR, peroxisome proliferator-activated receptor; SCD1, stearoyl–CoA desaturase-1; SGLT2, sodium-glucose co-transporter-2; TUDCA, tauroursodeoxycholic acid; and UDCA, ursodeoxycholic acid. [file elife-56573-fig3-data1.xlsx]

## Sheet: Figure 3_Supplementary Table 1
	Drug class	k	Weight difference (% control)		Glucose difference (% control)		Insulin difference (% control)
			Mean (SD)	95% CI	Mean (SD)	95% CI	Mean (SD)	95% CI
	ACC inhibitor	4	1.01 (0.03)	0.97 - 1.06	1.03 (0.05)	0.94 - 1.11	1.05 (0.17)	0.78 - 1.32
	ACE inhibitor	3	0.96		0.89 (0.1)	0.64 - 1.15	0.63 (0.23)	0.06 - 1.21
	Alpha glucosidase inhibitor	4	0.83 (0.07)	0.72 - 0.94	0.79 (0.09)	0.64 - 0.94	0.83 (0.04)	0.77 - 0.89
	Alpha-linoleic acid	4	0.98 (0.04)	0.92 - 1.04
	Angiotensin Receptor Blocker	18	0.93 (0.06)	0.9 - 0.96	1.07 (0.26)	0.93 - 1.2	0.63 (0.37)	0.44 - 0.81
	Berberine	9	0.92 (0.01)	0.91 - 0.93	0.58 (0.22)	0.41 - 0.74	0.28
	Bifidobacterium sp.	7	0.92		0.87 (0.12)	0.77 - 0.98	1.03
	Biguanide	39	0.93 (0.1)	0.9 - 0.96	0.78 (0.21)	0.71 - 0.85	0.77 (0.44)	0.63 - 0.91
	Carnitine	3	0.99 (0.03)	0.9 - 1.08	1.39
	Caspase inhibitor	4	0.94 (0.06)	0.85 - 1.04	0.93		0.95
	CB1 antagonist (Rimobant)	3	0.82 (0.16)	0.41 - 1.23	0.79 (0.33)	-0.03 - 1.6	0.17 (0.07)	0.01 - 0.33
	Cholesterol Absorption Inhibitor	15	0.97 (0.06)	0.94 - 1.01	0.86 (0.18)	0.76 - 0.96	0.75 (0.4)	0.53 - 0.97
	Coffee	4	0.96 (0.05)	0.88 - 1.04	1.05 (0.22)	0.7 - 1.39	0.57
	Curcumin	11	0.93 (0.13)	0.84 - 1.02	0.79 (0.17)	0.68 - 0.91	0.65 (0.36)	0.41 - 0.89
	Docosahexaenoic acid	4	1.04 (0.03)	0.99 - 1.09	0.85 (0.16)	0.61 - 1.1	1.48
	DPP4 inhibitor	19	0.93 (0.11)	0.88 - 0.99	0.82 (0.16)	0.75 - 0.9	0.84 (0.57)	0.56 - 1.11
	Eicosapentaenoic acid	10	0.9 (0.19)	0.76 - 1.04	0.93 (0.19)	0.79 - 1.07	0.78 (0.34)	0.53 - 1.02
	Fibrates	45	0.92 (0.12)	0.89 - 0.96	0.81 (0.21)	0.75 - 0.88	0.65 (0.25)	0.58 - 0.73
	FXR agonist	25	0.98 (0.07)	0.95 - 1.01	0.99 (0.11)	0.94 - 1.03	1.01 (0.32)	0.88 - 1.14
	GLP-1 agonist	34	0.87 (0.08)	0.85 - 0.9	0.81 (0.11)	0.77 - 0.85	0.54 (0.3)	0.43 - 0.64
	Lactobacillus sp.	12	0.87 (0.07)	0.83 - 0.92	0.86 (0.12)	0.79 - 0.94	0.98 (0.19)	0.86 - 1.09
	LXR inhibition	4	0.85 (0.1)	0.69 - 1.01	0.61
	N-acetylcysteine	5	0.97 (0.06)	0.9 - 1.05	1.06 (0.13)	0.9 - 1.22	0.69
	Omega-3 polyunsaturated fatty acids (mix)	21	0.98 (0.11)	0.93 - 1.03	0.85 (0.18)	0.77 - 0.93	0.85 (0.3)	0.71 - 0.98
	PDE inhibitor (Pentoxifylline)	3	0.99		0.98 (0.17)	0.56 - 1.41	0.87 (0.27)	0.21 - 1.53
	Polyphenol (Resveratrol)	25	0.96 (0.08)	0.93 - 0.99	0.85 (0.2)	0.77 - 0.93	0.66 (0.25)	0.56 - 0.76
	PPAR agonist (other)	2	1 (0.07)	0.34 - 1.67	0.47 (0.05)	0.03 - 0.92	0.2
	PPARalpha-delta agonist	10	0.9 (0.09)	0.84 - 0.96	0.87 (0.15)	0.77 - 0.98	0.5 (0.15)	0.39 - 0.6
	Probiotic (mix)	11	0.95 (0.14)	0.86 - 1.05	0.95 (0.08)	0.89 - 1	0.7 (0.09)	0.64 - 0.76
	SCD-1 inhibitor	3	0.62		0.95		0.45
	SGLT2 inhibitor	9	0.98 (0.05)	0.94 - 1.01	0.7 (0.18)	0.56 - 0.83	1.48 (1.24)	0.52 - 2.44
	Silymarin	8	0.97 (0.05)	0.94 - 1.01	0.8 (0.11)	0.7 - 0.89	0.63 (0.15)	0.5 - 0.76
	Statin	36	0.97 (0.06)	0.95 - 0.99	0.98 (0.17)	0.92 - 1.04	0.97 (0.32)	0.86 - 1.08
	Tauroursodeoxycholic acid (TUDCA)	4	0.87 (0.09)	0.72 - 1.02	0.67 (0.28)	0.22 - 1.12	0.79 (0.25)	0.4 - 1.19
	Thiazolidinediones	58	1.02 (0.15)	0.98 - 1.06	0.77 (0.17)	0.73 - 0.82	0.64 (0.28)	0.57 - 0.71
	Trigonella seed extract	3	1.01		1.01		0.95
	UCDA	3	0.97		0.79		0.36
	Vitamin D	6	0.92 (0.05)	0.86 - 0.97	0.94 (0.18)	0.74 - 1.13	1.31
	Vitamin E	6	1 (0.03)	0.96 - 1.03	1.05 (0.21)	0.83 - 1.27	0.72 (0.15)	0.56 - 0.88
