# Supplementary material for: Weight loss, insulin resistance, and study design confound results in a meta-analysis of animal models of fatty liver
Source: eLife. 2020 Oct 16;9:e56573. doi: 10.7554/eLife.56573 (PMC7647398; doi:10.7554/eLife.56573)
Supplement: Figure 4—source data 1. — Tab 1. Results from meta-analysis of steatosis grade with subgroup by drug class. Tab 2. Results from meta-analysis of steatosis grade with subgroup by individual drug. Tab 3. Results from meta-analysis of steatosis grade with subgroup by drug class, after removal of outlier studies. Tab 4. Results from univariable meta-regression analyses. Tab 5. Results from model 1 (without drug) and model 2 (including drug class used) multivariable meta-regression analyses. [file elife-56573-fig4-data1.xlsx]

## Sheet: Steat_metan_class
	Drug class	k (cohorts)	Number of animals			Heterogeneity				Effect estimate
			Controls	Interventional	Total	I^2	Tau	Q	Pq	MD (95% CI)	Pz
	Angiotensin Receptor Blocker	9	92	79	171	0.554587	0.2	17.9609	0.022	-0.4 (-0.6, -0.2)	0.0028
	Biguanide	9	74	95	169	0.968046	1	250.359	1.4e-49	-0.6 (-1.4, 0.1)	0.093
	Caspase inhibitor	5	42	57	99	0	0.2	3.52042	0.47	-0.2 (-0.6, 0.1)	0.083
	Cholesterol Absorption Inhibitor	5	24	39	63	0.592349	0.3	9.81232	0.044	-0.3 (-0.8, 0.2)	0.13
	Curcumin	5	48	58	106	0.933336	0.5	60.002	2.9e-12	-0.8 (-1.5, -0.2)	0.026
	Docosahexaenoic acid	3	16	19	35	0.515018	0.4	4.12386	0.13	-0.7 (-2.2, 0.8)	0.18
	DPP4 inhibitor	9	55	77	132	0.888177	0.5	71.5414	2.4e-12	-1.1 (-1.5, -0.7)	0.00017
	Eicosapentaenoic acid	8	56	56	112	0.922985	0.8	90.8908	8.1e-17	-0.2 (-0.8, 0.5)	0.53
	Fibrates	6	41	47	88	0.862236	0.6	36.2941	8.3e-07	-2.1 (-2.9, -1.4)	0.00057
	FXR agonist	8	69	89	158	0.820973	0.5	39.1002	1.9e-06	-0.3 (-0.7, 0.1)	0.15
	GLP-1 agonist	6	48	52	100	0.960098	0.9	125.306	2.4e-25	-1.2 (-2.2, -0.2)	0.023
	Lactobacillus sp.	5	25	54	79	0	0.1	0.915137	0.92	-0.6 (-0.7, -0.5)	0.00024
	N-acetylcysteine	3	27	37	64	0.903654	1.2	20.7586	3.1e-05	0.2 (-3.0, 3.4)	0.81
	Omega-3 polyunsaturated fatty acids (mix)	5	30	49	79	0.922254	1.1	51.4493	1.8e-10	-1.3 (-2.7, 0.2)	0.077
	Probiotic (mix)	12	100	123	223	0.628624	0.5	29.6196	0.0018	-0.8 (-1.2, -0.4)	0.00057
	Silymarin	4	26	38	64	0.867155	0.6	22.5826	4.9e-05	-0.7 (-1.7, 0.4)	0.13
	Statin	18	63	170	233	0.817484	0.6	93.1424	1.6e-12	-0.4 (-0.8, -0.1)	0.016
	Tauroursodeoxycholic acid (TUDCA)	4	36	76	112	0.641911	0.4	8.3778	0.039	-0.7 (-1.5, 0.1)	0.059
	Thiazolidinediones	9	71	73	144	0.811885	0.4	42.5273	1.1e-06	-0.6 (-1.0, -0.2)	0.0052
	Vitamin D	4	38	48	86	0.41723	0.2	5.14783	0.16	-0.5 (-1.0, 0.0)	0.055
	Vitamin E	4	20	30	50	0.511488	0.3	6.1411	0.1	-0.2 (-0.8, 0.3)	0.25
	Overall	141	1001	1366	2367	0.938503	0.7	2276.52	0	-0.7 (-0.8, -0.5)	2.1e-19

## Sheet: Steat_metan_drug
	Drug	k (cohorts)	Number of animals			Heterogeneity				Effect estimate
			Controls	Interventional	Total	I^2	Tau	Q	Pq	MD (95% CI)	Pz
	ARB (Telmisartan)	5	63	44	107	0.315816	0.2	5.84638	0.21	-0.4 (-0.7, -0.1)	0.022
	Curcumin	5	48	58	106	0.933336	0.5	60.002	2.9e-12	-0.8 (-1.5, -0.2)	0.026
	Docosahexaenoic acid	3	16	19	35	0.515018	0.4	4.12386	0.13	-0.7 (-2.2, 0.8)	0.18
	DPP4 inhibitor (Sitagliptin)	7	46	65	111	0.910306	0.5	66.8944	1.8e-12	-1.2 (-1.6, -0.7)	0.0011
	Eicosapentaenoic acid	8	56	56	112	0.922985	0.8	90.8908	8.1e-17	-0.2 (-0.8, 0.5)	0.53
	Ezetimibe	5	24	39	63	0.592349	0.3	9.81232	0.044	-0.3 (-0.8, 0.2)	0.13
	Fibrate (Fenofibrate)	4	21	27	48	0.737121	0.5	11.4121	0.0097	-1.9 (-2.9, -0.9)	0.0097
	FXR agonist (Obetacholic acid)	7	54	74	128	0.774444	0.4	26.601	0.00017	-0.2 (-0.6, 0.2)	0.3
	Metformin	9	74	95	169	0.968046	1	250.359	1.4e-49	-0.6 (-1.4, 0.1)	0.093
	N-acetylcysteine	3	27	37	64	0.903654	1.2	20.7586	3.1e-05	0.2 (-3.0, 3.4)	0.81
	Probiotics	5	56	63	119	0.518558	0.3	8.30838	0.081	-0.9 (-1.4, -0.4)	0.0064
	Silymarin	3	20	30	50	0.838097	0.4	12.3531	0.0021	-0.5 (-1.7, 0.8)	0.27
	Statin (Atorvastatin)	5	20	44	64	0.892576	0.7	37.2356	1.6e-07	-0.6 (-1.5, 0.4)	0.17
	Statin (Fluvastatin)	4	20	50	70	0.561587	0.7	6.84286	0.077	-0.5 (-1.7, 0.8)	0.32
	Statin (Rosuvastatin)	3	6	24	30	0.522021	0.6	4.18429	0.12	-0.2 (-2.1, 1.8)	0.76
	Statin (Simvastatin)	3	7	28	35	0.534033	0.4	4.29215	0.12	-0.3 (-1.7, 1.1)	0.44
	Tauroursodeoxycholic acid (TUDCA)	4	36	76	112	0.641911	0.4	8.3778	0.039	-0.7 (-1.5, 0.1)	0.059
	Thiazolidinediones (Rosiglitazone)	5	35	37	72	0	0.2	2.64652	0.62	-0.6 (-1.0, -0.3)	0.0079
	Vitamin D	4	38	48	86	0.41723	0.2	5.14783	0.16	-0.5 (-1.0, 0.0)	0.055
	Vitamin E	4	20	30	50	0.511488	0.3	6.1411	0.1	-0.2 (-0.8, 0.3)	0.25
	Overall	96	687	944	1631	0.928093	0.6	1321.15	5e-215	-0.6 (-0.7, -0.4)	1.3e-12

## Sheet: Steat_metan_class_NoOutlier
	Drug class	k (cohorts)	Number of animals			Heterogeneity				Effect estimate
			Controls	Interventional	Total	I^2	Tau	Q	Pq	MD (95% CI)	Pz
	Angiotensin Receptor Blocker	8	82	69	151	0.609545	0.2	17.9278	0.012	-0.4 (-0.7, -0.2)	0.0053
	Biguanide	9	74	95	169	0.968046	1	250.359	1.4e-49	-0.6 (-1.4, 0.1)	0.093
	Caspase inhibitor	5	42	57	99	0	0.2	3.52042	0.47	-0.2 (-0.6, 0.1)	0.083
	Cholesterol Absorption Inhibitor	5	24	39	63	0.592349	0.3	9.81232	0.044	-0.3 (-0.8, 0.2)	0.13
	Curcumin	4	42	52	94	0.947365	0.5	56.996	2.6e-12	-0.8 (-1.7, 0.2)	0.085
	DPP4 inhibitor	9	55	77	132	0.888177	0.5	71.5414	2.4e-12	-1.1 (-1.5, -0.7)	0.00017
	Eicosapentaenoic acid	8	56	56	112	0.922985	0.8	90.8908	8.1e-17	-0.2 (-0.8, 0.5)	0.53
	Fibrates	6	41	47	88	0.862236	0.6	36.2941	8.3e-07	-2.1 (-2.9, -1.4)	0.00057
	FXR agonist	6	53	72	125	0.809525	0.5	26.2502	8e-05	-0.4 (-1.0, 0.1)	0.12
	GLP-1 agonist	5	37	41	78	0.947713	0.8	76.5003	9.6e-16	-1.0 (-2.1, 0.1)	0.061
	Lactobacillus sp.	5	25	54	79	0	0.1	0.915137	0.92	-0.6 (-0.7, -0.5)	0.00024
	N-acetylcysteine	3	27	37	64	0.903654	1.2	20.7586	3.1e-05	0.2 (-3.0, 3.4)	0.81
	Omega-3 polyunsaturated fatty acids (mix)	5	30	49	79	0.922254	1.1	51.4493	1.8e-10	-1.3 (-2.7, 0.2)	0.077
	Probiotic (mix)	12	100	123	223	0.628624	0.5	29.6196	0.0018	-0.8 (-1.2, -0.4)	0.00057
	Silymarin	3	16	28	44	0.373979	0.3	3.19478	0.2	-1.0 (-2.1, 0.2)	0.069
	Statin	18	63	170	233	0.817484	0.6	93.1424	1.6e-12	-0.4 (-0.8, -0.1)	0.016
	Tauroursodeoxycholic acid (TUDCA)	4	36	76	112	0.641911	0.4	8.3778	0.039	-0.7 (-1.5, 0.1)	0.059
	Thiazolidinediones	9	71	73	144	0.811885	0.4	42.5273	1.1e-06	-0.6 (-1.0, -0.2)	0.0052
	Vitamin D	4	38	48	86	0.41723	0.2	5.14783	0.16	-0.5 (-1.0, 0.0)	0.055
	Vitamin E	4	20	30	50	0.511488	0.3	6.1411	0.1	-0.2 (-0.8, 0.3)	0.25
	Overall	132	932	1293	2225	0.925938	0.7	1768.78	9.9e-285	-0.7 (-0.8, -0.5)	2e-18

## Sheet: Steat_univariable
Analysis	Variable	Beta (SE)	p-value	AdjR^2	k
Steat_univariate	log_Gluc_change	1.4 (0.3)	2.4e-06	20.8	94
Steat_univariate	Indiv_drug_class_3Fibrate (Fenofibrate)	-1.6 (0.5)	0.00078	NA	96
Steat_univariate	log_Wt_change	1.5 (0.5)	0.0012	7.1	127
Steat_univariate	Sex_overall	-	0.012	4.1	168
Steat_univariate	Indiv_drug_class_3_overall	-	0.024	15.5	96
Steat_univariate	Indiv_drug_class_3DPP4 inhibitor (Sitagliptin)	-0.9 (0.4)	0.029	NA	96
Steat_univariate	log_Insul_change	0.3 (0.2)	0.054	5	59
Steat_univariate	log_Fat_kcal	0.4 (0.2)	0.1	1.7	99
Steat_univariate	log_Age_start	0.1 (0.1)	0.11	0.9	164
Steat_univariate	log_Sucr_kcal	0.9 (0.5)	0.13	15.5	10
Steat_univariate	Qual_score	0.1 (0.1)	0.15	0.5	174
Steat_univariate	Randomisation	0.2 (0.1)	0.17	0.6	174
Steat_univariate	Indiv_drug_class_3Probiotics	-0.6 (0.4)	0.17	NA	96
Steat_univariate	Background_simpleSprague Dawley	-0.3 (0.2)	0.18	NA	146
Steat_univariate	Indiv_drug_class_3Curcumin	-0.5 (0.4)	0.21	NA	96
Steat_univariate	SexF	0.8 (0.7)	0.22	NA	168
Steat_univariate	Background_simpleNot stated	0.3 (0.3)	0.22	NA	146
Steat_univariate	Power_calculation	0.4 (0.4)	0.31	0	174
Steat_univariate	Indiv_drug_class_3Tauroursodeoxycholic acid (TUDCA)	-0.5 (0.4)	0.31	NA	96
Steat_univariate	Model_simple_overall	-	0.33	0.9	110
Steat_univariate	Background_simple_overall	-	0.34	0.4	146
Steat_univariate	Indiv_drug_class_3Metformin	-0.3 (0.4)	0.38	NA	96
Steat_univariate	Indiv_drug_class_3N-acetylcysteine	0.4 (0.5)	0.41	NA	96
Steat_univariate	Indiv_drug_class_3Thiazolidinediones (Rosiglitazone)	-0.4 (0.4)	0.41	NA	96
Steat_univariate	Model_simpleCholine-deficient L-amino-defined diet / CDAA	0.4 (0.4)	0.41	NA	110
Steat_univariate	Model_simpleHFD + STZ	0.3 (0.4)	0.43	NA	110
Steat_univariate	Blinding	0.1 (0.1)	0.45	0	174
Steat_univariate	Indiv_drug_class_3Docosahexaenoic acid	-0.4 (0.5)	0.47	NA	96
Steat_univariate	Indiv_drug_class_3Vitamin D	-0.3 (0.5)	0.48	NA	96
Steat_univariate	Drug_dose	-0.1 (0.1)	0.5	0	73
Steat_univariate	Background_simpleLong Evans	0.2 (0.3)	0.51	NA	146
Steat_univariate	Indiv_drug_class_3Statin (Atorvastatin)	-0.3 (0.4)	0.52	NA	96
Steat_univariate	log_Duration	0.0 (0.1)	0.53	0	174
Steat_univariate	log_FructGluc_per	-0.2 (0.4)	0.56	0	14
Steat_univariate	Model_simpleHigh Fat + High Cholesterol Diet	0.2 (0.4)	0.64	NA	110
Steat_univariate	SexM	0.3 (0.7)	0.67	NA	168
Steat_univariate	Model_simpleHigh Fat Diet / HFD	-0.2 (0.4)	0.67	NA	110
Steat_univariate	Indiv_drug_class_3Silymarin	-0.2 (0.5)	0.69	NA	96
Steat_univariate	Model_simpleMethionine and choline deficient diet / MCD	0.1 (0.4)	0.7	NA	110
Steat_univariate	Indiv_drug_class_3ARB (Telmisartan)	-0.2 (0.4)	0.72	NA	96
Steat_univariate	Indiv_drug_class_3Statin (Fluvastatin)	-0.2 (0.5)	0.73	NA	96
Steat_univariate	Background_simpleC57BL/6J	0.1 (0.2)	0.75	NA	146
Steat_univariate	Model_simpleMSG (L-monosodium glutamate) injection	-0.1 (0.4)	0.77	NA	110
Steat_univariate	Indiv_drug_class_3Eicosapentaenoic acid	0.1 (0.4)	0.79	NA	96
Steat_univariate	Indiv_drug_class_3FXR agonist (Obetacholic acid)	0.1 (0.4)	0.81	NA	96
Steat_univariate	Indiv_drug_class_3Statin (Rosuvastatin)	0.1 (0.5)	0.81	NA	96
Steat_univariate	Background_simpleC57BL/6?	0.0 (0.2)	0.83	NA	146
Steat_univariate	Indiv_drug_class_3Ezetimibe	-0.1 (0.4)	0.85	NA	96
Steat_univariate	Indiv_drug_class_3Statin (Simvastatin)	-0.1 (0.5)	0.89	NA	96
Steat_univariate	Chol_per	0.0 (0.1)	0.91	0	41
Steat_univariate	log_Age_end	0.0 (0.1)	0.94	0	164
Steat_univariate	Protocol	0.0 (0.2)	0.95	0	174
Steat_NoWtLoss	log_Wt_change	1.8 (0.4)	0.00014	12.5	102
Steat_NoWtLoss	log_Gluc_change	1.3 (0.3)	2.3e-05	19.1	83
Steat_NoWtLoss	log_Insul_change	0.6 (0.2)	0.0027	14.4	56

## Sheet: Steat_multivariable
	Analysis	Variable	Model 1: Beta (SE)	Model 1: p-value	Model 2: Beta (SE)	Model 2: p-value
Steat_multivariable	Steat_multivariable	Background_simpleC57BL/6?	1.5 (0.3)	0.0013	0.2 (0.5)	0.67
Steat_multivariable	Steat_multivariable	Background_simpleC57BL/6J	1.0 (0.3)	0.0056	-0.3 (0.5)	0.48
Steat_multivariable	Steat_multivariable	SexF	1.3 (0.5)	0.022	0.7 (0.7)	0.33
Steat_multivariable	Steat_multivariable	log_Gluc_change	0.7 (0.4)	0.076	NA	NA
Steat_multivariable	Steat_multivariable	log_Fat_kcal	-0.9 (0.7)	0.25	0.6 (0.4)	0.2
Steat_multivariable	Steat_multivariable	log_Wt_change	0.7 (0.6)	0.27	0.1 (0.9)	0.91
Steat_multivariable	Steat_multivariable	Background_simpleSprague Dawley	NA	NA	-0.3 (0.5)	0.6
Steat_multivariable	Steat_multivariable	Model_simpleHFD + STZ	NA	NA	0.2 (0.3)	0.49
Steat_multivariable	Steat_multivariable	Model_simpleHigh Fat + High Cholesterol Diet	NA	NA	-0.7 (0.5)	0.18
