# Supplementary material for: Weight loss, insulin resistance, and study design confound results in a meta-analysis of animal models of fatty liver
Source: eLife. 2020 Oct 16;9:e56573. doi: 10.7554/eLife.56573 (PMC7647398; doi:10.7554/eLife.56573)
Supplement: Figure 5—source data 1. — Tab 1. Results from meta-analysis of lobular inflammation with subgroup by drug class. Tab 2. Results from meta-analysis of lobular inflammation with subgroup by individual drug. Tab 3. Results from meta-analysis of lobular inflammation with subgroup by drug class, after removal of outlier studies. Tab 4. Results from univariable meta-regression analyses. Tab 5. Results from multivariable meta-regression analyses. [file elife-56573-fig5-data1.xlsx]

## Sheet: LobInf_metan_class
	Drug class	k (cohorts)	Number of animals			Heterogeneity				Effect estimate
			Controls	Interventional	Total	I^2	Tau	Q	Pq	MD (95% CI)	Pz
	Angiotensin Receptor Blocker	8	81	67	148	0.85881	0.6	49.5785	1.7e-08	-0.7 (-1.2, -0.2)	0.016
	Biguanide	8	63	93	156	0.803427	0.3	35.6102	8.6e-06	-0.5 (-0.8, -0.2)	0.011
	Cholesterol Absorption Inhibitor	4	15	30	45	0.232031	0.2	3.90641	0.27	-0.1 (-0.5, 0.3)	0.51
	Curcumin	4	38	38	76	0.957071	0.4	69.8832	4.5e-15	-0.5 (-1.2, 0.2)	0.094
	DPP4 inhibitor	8	49	71	120	0.785543	0.4	32.6406	3.1e-05	-0.6 (-1.0, -0.2)	0.0056
	Eicosapentaenoic acid	6	36	42	78	0.960993	0.8	128.183	5.8e-26	-0.8 (-1.6, 0.1)	0.068
	Fibrates	5	39	41	80	0.866326	0.6	29.9234	5.1e-06	-1.1 (-1.9, -0.3)	0.02
	FXR agonist	8	96	137	233	0.912541	0.4	80.0377	1.4e-14	-0.7 (-1.0, -0.3)	0.0048
	GLP-1 agonist	4	36	40	76	0.95144	0.8	61.7793	2.4e-13	-0.9 (-2.2, 0.4)	0.11
	N-acetylcysteine	3	22	24	46	0	0.1	0.528064	0.77	-0.3 (-0.7, 0.1)	0.084
	Probiotic (mix)	10	94	117	211	0	0.2	6.47421	0.69	-0.8 (-0.9, -0.6)	3.8e-06
	Silymarin	3	21	28	49	0.664792	0.4	5.96645	0.051	-0.3 (-1.5, 0.9)	0.37
	Statin	11	43	106	149	0.817128	0.7	54.6832	3.6e-08	-0.7 (-1.3, -0.2)	0.013
	Thiazolidinediones	14	106	108	214	0.829245	0.4	76.1326	5.9e-11	-0.4 (-0.7, -0.2)	0.0053
	Vitamin D	4	38	48	86	0	0.1	1.46678	0.69	-0.4 (-0.7, -0.1)	0.022
	Vitamin E	3	14	24	38	0.862872	0.5	14.5849	0.00068	-0.7 (-2.1, 0.8)	0.18
	Overall	103	791	1014	1805	0.890539	0.5	931.835	4.3e-134	-0.6 (-0.7, -0.5)	2.8e-20

## Sheet: LobInf_metan_drug
	Drug	k (cohorts)	Number of animals			Heterogeneity				Effect estimate
			Controls	Interventional	Total	I^2	Tau	Q	Pq	MD (95% CI)	Pz
	ARB (Telmisartan)	5	63	44	107	0.789628	0.5	19.0139	0.00078	-0.8 (-1.6, -0.1)	0.042
	Curcumin	4	38	38	76	0.957071	0.4	69.8832	4.5e-15	-0.5 (-1.2, 0.2)	0.094
	DPP4 inhibitor (Sitagliptin)	6	40	59	99	0.826332	0.4	28.7905	2.5e-05	-0.6 (-1.0, -0.2)	0.017
	Eicosapentaenoic acid	6	36	42	78	0.960993	0.8	128.183	5.8e-26	-0.8 (-1.6, 0.1)	0.068
	Ezetimibe	4	15	30	45	0.232031	0.2	3.90641	0.27	-0.1 (-0.5, 0.3)	0.51
	Fibrate (Fenofibrate)	3	19	21	40	0.907	0.7	21.5053	2.1e-05	-1.4 (-3.3, 0.6)	0.094
	FXR agonist (Obetacholic acid)	6	73	114	187	0.923202	0.4	65.1057	1.1e-12	-0.5 (-1.0, -0.1)	0.033
	Metformin	8	63	93	156	0.803427	0.3	35.6102	8.6e-06	-0.5 (-0.8, -0.2)	0.011
	N-acetylcysteine	3	22	24	46	0	0.1	0.528064	0.77	-0.3 (-0.7, 0.1)	0.084
	Probiotics	5	56	63	119	0	0.1	2.02316	0.73	-0.7 (-1.0, -0.5)	0.00089
	Thiazolidinediones (Pioglitazone)	5	43	43	86	0.789716	0.5	19.0219	0.00078	-0.6 (-1.3, 0.1)	0.089
	Thiazolidinediones (Rosiglitazone)	8	53	55	108	0.830344	0.3	41.2599	7.2e-07	-0.4 (-0.7, 0.0)	0.035
	Vitamin D	4	38	48	86	0	0.1	1.46678	0.69	-0.4 (-0.7, -0.1)	0.022
	Vitamin E	3	14	24	38	0.862872	0.5	14.5849	0.00068	-0.7 (-2.1, 0.8)	0.18
	Overall	70	573	698	1271	0.88882	0.4	620.615	1.1e-89	-0.6 (-0.7, -0.5)	3.5e-14

## Sheet: LobInf_metan_class_NoOutlier
	Drug class	k (cohorts)	Number of animals			Heterogeneity				Effect estimate
			Controls	Interventional	Total	I^2	Tau	Q	Pq	MD (95% CI)	Pz
	Angiotensin Receptor Blocker	7	71	57	128	0.875232	0.6	48.0893	1.1e-08	-0.7 (-1.3, -0.1)	0.03
	Biguanide	7	43	68	111	0.831011	0.4	35.5053	3.4e-06	-0.5 (-0.9, -0.1)	0.021
	DPP4 inhibitor	8	49	71	120	0.785543	0.4	32.6406	3.1e-05	-0.6 (-1.0, -0.2)	0.0056
	Fibrates	4	29	31	60	0	0.1	2.00632	0.57	-0.8 (-1.2, -0.5)	0.0049
	FXR agonist	7	88	129	217	0.908211	0.4	65.3676	3.6e-12	-0.6 (-1.0, -0.2)	0.012
	GLP-1 agonist	3	25	29	54	0.879151	0.5	16.5495	0.00025	-0.6 (-2.0, 0.8)	0.23
	N-acetylcysteine	3	22	24	46	0	0.1	0.528064	0.77	-0.3 (-0.7, 0.1)	0.084
	Probiotic (mix)	10	94	117	211	0	0.2	6.47421	0.69	-0.8 (-0.9, -0.6)	3.8e-06
	Statin	11	43	106	149	0.817128	0.7	54.6832	3.6e-08	-0.7 (-1.3, -0.2)	0.013
	Thiazolidinediones	13	104	102	206	0.793791	0.4	58.1933	4.8e-08	-0.5 (-0.8, -0.2)	0.0038
	Vitamin D	4	38	48	86	0	0.1	1.46678	0.69	-0.4 (-0.7, -0.1)	0.022
	Vitamin E	3	14	24	38	0.862872	0.5	14.5849	0.00068	-0.7 (-2.1, 0.8)	0.18
	Overall	80	620	806	1426	0.803953	0.4	402.965	6.2e-45	-0.6 (-0.7, -0.5)	2.7e-18

## Sheet: LobInf_univariable
Analysis	Variable	Beta (SE)	p-value	AdjR^2	k
LobInf_univarate	Qual_score	0.2 (0.1)	0.0012	6.3	143
LobInf_univarate	Protocol	0.1 (0.2)	0.5	0	143
LobInf_univarate	Randomisation	0.2 (0.1)	0.011	3.7	143
LobInf_univarate	Blinding	0.2 (0.1)	0.051	1.9	143
LobInf_univarate	Power_calculation	0.5 (0.3)	0.055	1.8	143
LobInf_univarate	Chol_per	0.0 (0.1)	0.94	0	40
LobInf_univarate	log_FructGluc_per	0.5 (0.4)	0.22	5.4	13
LobInf_univarate	log_Sucr_kcal	0.0 (0.6)	0.99	0	8
LobInf_univarate	log_Fat_kcal	1.0 (0.2)	1.7e-05	20.8	76
LobInf_univarate	log_Age_start	0.0 (0.1)	0.91	0	136
LobInf_univarate	log_Duration	0.0 (0.1)	0.47	0	143
LobInf_univarate	log_Age_end	-0.1 (0.1)	0.24	0.3	136
LobInf_univarate	log_Wt_change	1.3 (0.4)	0.00066	10.5	96
LobInf_univarate	log_Gluc_change	0.4 (0.2)	0.064	3.5	72
LobInf_univarate	log_Insul_change	-0.2 (0.1)	0.27	0.5	46
LobInf_univarate	SexF	0.6 (0.3)	0.042	NA	140
LobInf_univarate	SexM	0.3 (0.3)	0.23	NA	140
LobInf_univarate	Sex_overall		0.055	2.9	140
LobInf_univarate	Drug_dose	0.0 (0.1)	0.72	0	55
LobInf_univarate	Indiv_drug_class_3ARB (Telmisartan)	-0.2 (0.4)	0.69	NA	70
LobInf_univarate	Indiv_drug_class_3Curcumin	0.2 (0.4)	0.7	NA	70
LobInf_univarate	Indiv_drug_class_3DPP4 inhibitor (Sitagliptin)	0.1 (0.4)	0.86	NA	70
LobInf_univarate	Indiv_drug_class_3Eicosapentaenoic acid	-0.1 (0.4)	0.82	NA	70
LobInf_univarate	Indiv_drug_class_3Ezetimibe	0.5 (0.4)	0.17	NA	70
LobInf_univarate	Indiv_drug_class_3Fibrate (Fenofibrate)	-0.7 (0.4)	0.1	NA	70
LobInf_univarate	Indiv_drug_class_3FXR agonist (Obetacholic acid)	0.2 (0.4)	0.67	NA	70
LobInf_univarate	Indiv_drug_class_3Metformin	0.2 (0.3)	0.63	NA	70
LobInf_univarate	Indiv_drug_class_3N-acetylcysteine	0.3 (0.4)	0.45	NA	70
LobInf_univarate	Indiv_drug_class_3Probiotics	0.0 (0.4)	0.98	NA	70
LobInf_univarate	Indiv_drug_class_3Thiazolidinediones (Pioglitazone)	0.1 (0.4)	0.86	NA	70
LobInf_univarate	Indiv_drug_class_3Thiazolidinediones (Rosiglitazone)	0.3 (0.4)	0.44	NA	70
LobInf_univarate	Indiv_drug_class_3Vitamin D	0.3 (0.4)	0.43	NA	70
LobInf_univarate	Indiv_drug_class_3_overall		0.31	3.3	70
LobInf_univarate	Model_simpleCholine-deficient L-amino-defined diet / CDAA	0.2 (0.4)	0.62	NA	98
LobInf_univarate	Model_simpleHFD + STZ	0.2 (0.3)	0.6	NA	98
LobInf_univarate	Model_simpleHigh Fat + High Cholesterol Diet	0.0 (0.3)	0.95	NA	98
LobInf_univarate	Model_simpleHigh Fat Diet / HFD	0.0 (0.3)	0.91	NA	98
LobInf_univarate	Model_simpleMethionine and choline deficient diet / MCD	-0.2 (0.3)	0.62	NA	98
LobInf_univarate	Model_simpleMSG (L-monosodium glutamate) injection	-0.1 (0.4)	0.71	NA	98
LobInf_univarate	Model_simple_overall		0.57	0	98
LobInf_univarate	Background_simpleC57BL/6?	-0.2 (0.2)	0.12	NA	122
LobInf_univarate	Background_simpleC57BL/6J	0.0 (0.1)	0.81	NA	122
LobInf_univarate	Background_simpleLong Evans	0.0 (0.2)	0.94	NA	122
LobInf_univarate	Background_simpleNot stated	0.3 (0.2)	0.16	NA	122
LobInf_univarate	Background_simpleSprague Dawley	0.0 (0.2)	0.77	NA	122
LobInf_univarate	Background_simple_overall		0.28	1	122
LobInf_NoWtLoss	log_Wt_change	1.4 (0.4)	0.0004	15	72
LobInf_NoWtLoss	log_Gluc_change	0.4 (0.2)	0.14	2.1	60
LobInf_NoWtLoss	log_Insul_change	0.0 (0.2)	0.9	0	41

## Sheet: LobInf_multivariable
Analysis	Variable	Model 1: Beta (SE)	Model 1: p-value
LobInf_multivariable	log_Fat_kcal	0.6 (0.5)	0.28
LobInf_multivariable	SexF	0.3 (0.5)	0.59
LobInf_multivariable	log_Wt_change	1.3 (0.8)	0.14
LobInf_multivariable	log_Gluc_change	-0.1 (0.4)	0.77
