# Supplementary material for: Weight loss, insulin resistance, and study design confound results in a meta-analysis of animal models of fatty liver
Source: eLife. 2020 Oct 16;9:e56573. doi: 10.7554/eLife.56573 (PMC7647398; doi:10.7554/eLife.56573)
Supplement: Figure 6—source data 1. — Tab 1. Results from meta-analysis of hepatocellular ballooning with subgroup by drug class. Tab 2. Results from meta-analysis of hepatocellular ballooning with subgroup by individual drug. Tab 3. Results from meta-analysis of hepatocellular ballooning with subgroup by drug class, after removal of outlier studies. Tab 4. Results from univariable meta-regression analyses. [file elife-56573-fig6-data1.xlsx]

## Sheet: Bal_metan_class
	Drug class	k (cohorts)	Number of animals			Heterogeneity				Effect estimate
			Controls	Interventional	Total	I^2	Tau	Q	Pq	MD (95% CI)	Pz
	Angiotensin Receptor Blocker	7	77	63	140	0	0.2	5.44574	0.49	-0.4 (-0.6, -0.1)	0.015
	Biguanide	4	22	38	60	0.88443	0.4	25.9583	9.7e-06	-0.7 (-1.3, -0.1)	0.037
	Cholesterol Absorption Inhibitor	3	18	25	43	0	0.2	1.6324	0.44	-0.2 (-0.7, 0.3)	0.25
	DPP4 inhibitor	7	41	61	102	0.961893	0.4	157.453	2.1e-31	-0.5 (-1.0, -0.1)	0.027
	Eicosapentaenoic acid	6	36	42	78	0.974144	0.6	193.375	7.4e-40	-0.4 (-1.1, 0.2)	0.16
	Fibrates	4	36	36	72	0.682353	0.3	9.44446	0.024	-1.2 (-1.8, -0.7)	0.0054
	FXR agonist	8	93	139	232	0.414778	0.2	11.9613	0.1	-0.4 (-0.5, -0.2)	0.0034
	GLP-1 agonist	3	25	29	54	0.740904	0.3	7.71915	0.021	-0.3 (-1.2, 0.7)	0.33
	Probiotic (mix)	6	58	75	133	0	0	3.86078	0.57	-0.3 (-0.3, -0.2)	0.00015
	Silymarin	3	20	30	50	0	0	0.186386	0.91	0.0 (-0.1, 0.1)	0.71
	Statin	5	34	56	90	0.985767	0.4	281.042	1.3e-59	-0.5 (-1.0, 0.1)	0.071
	Tauroursodeoxycholic acid (TUDCA)	4	36	76	112	0.648452	0.3	8.53369	0.036	-0.4 (-1.0, 0.1)	0.097
	Thiazolidinediones	7	59	59	118	0.516976	0.2	12.4217	0.053	-0.6 (-0.9, -0.4)	0.0016
	Vitamin D	4	38	48	86	0.157651	0.2	3.56147	0.31	-0.6 (-1.0, -0.1)	0.023
	Overall	71	593	777	1370	0.936879	0.4	1108.98	1.1e-186	-0.5 (-0.6, -0.4)	3.5e-14

## Sheet: Bal_metan_drug
	Drug	k (cohorts)	Number of animals			Heterogeneity				Effect estimate
			Controls	Interventional	Total	I^2	Tau	Q	Pq	MD (95% CI)	Pz
	ARB (Telmisartan)	5	63	44	107	0	0.1	1.89458	0.76	-0.5 (-0.8, -0.3)	0.0061
	DPP4 inhibitor (Sitagliptin)	5	32	49	81	0.546498	0.2	8.82025	0.066	-0.9 (-1.2, -0.5)	0.0031
	Eicosapentaenoic acid	6	36	42	78	0.974144	0.6	193.375	7.4e-40	-0.4 (-1.1, 0.2)	0.16
	Ezetimibe	3	18	25	43	0	0.2	1.6324	0.44	-0.2 (-0.7, 0.3)	0.25
	FXR agonist (Obetacholic acid)	7	78	124	202	0.418584	0.2	10.3196	0.11	-0.3 (-0.5, -0.1)	0.01
	Metformin	4	22	38	60	0.88443	0.4	25.9583	9.7e-06	-0.7 (-1.3, -0.1)	0.037
	Probiotics	3	44	45	89	0.444455	0.1	3.60007	0.17	-0.3 (-0.5, 0.0)	0.043
	Silymarin	3	20	30	50	0	0	0.186386	0.91	0.0 (-0.1, 0.1)	0.71
	Tauroursodeoxycholic acid (TUDCA)	4	36	76	112	0.648452	0.3	8.53369	0.036	-0.4 (-1.0, 0.1)	0.097
	Vitamin D	4	38	48	86	0.157651	0.2	3.56147	0.31	-0.6 (-1.0, -0.1)	0.023
	Overall	44	387	521	908	0.925851	0.3	579.911	3.5e-95	-0.4 (-0.6, -0.3)	2.6e-09

## Sheet: Bal_metan_class_NoOutlier
	Drug class	k (cohorts)	Number of animals			Heterogeneity				Effect estimate
			Controls	Interventional	Total	I^2	Tau	Q	Pq	MD (95% CI)	Pz
	Angiotensin Receptor Blocker	6	67	53	120	0.0182442	0.2	5.09292	0.4	-0.4 (-0.7, -0.1)	0.027
	Biguanide	3	16	26	42	0.893889	0.4	18.8483	8.1e-05	-0.6 (-1.6, 0.4)	0.13
	Cholesterol Absorption Inhibitor	3	18	25	43	0	0.2	1.6324	0.44	-0.2 (-0.7, 0.3)	0.25
	DPP4 inhibitor	6	35	55	90	0.953473	0.4	107.465	1.4e-21	-0.7 (-1.1, -0.2)	0.018
	Eicosapentaenoic acid	5	28	34	62	0.925184	0.4	53.4642	6.8e-11	-0.2 (-0.7, 0.3)	0.29
	Fibrates	4	36	36	72	0.682353	0.3	9.44446	0.024	-1.2 (-1.8, -0.7)	0.0054
	FXR agonist	8	93	139	232	0.414778	0.2	11.9613	0.1	-0.4 (-0.5, -0.2)	0.0034
	GLP-1 agonist	3	25	29	54	0.740904	0.3	7.71915	0.021	-0.3 (-1.2, 0.7)	0.33
	Probiotic (mix)	6	58	75	133	0	0	3.86078	0.57	-0.3 (-0.3, -0.2)	0.00015
	Statin	3	18	32	50	0.494111	0.1	3.95344	0.14	-0.4 (-0.9, 0.1)	0.069
	Tauroursodeoxycholic acid (TUDCA)	4	36	76	112	0.648452	0.3	8.53369	0.036	-0.4 (-1.0, 0.1)	0.097
	Thiazolidinediones	7	59	59	118	0.516976	0.2	12.4217	0.053	-0.6 (-0.9, -0.4)	0.0016
	Vitamin D	4	38	48	86	0.157651	0.2	3.56147	0.31	-0.6 (-1.0, -0.1)	0.023
	Overall	62	527	687	1214	0.869194	0.3	466.34	9.1e-64	-0.5 (-0.6, -0.4)	9e-14

## Sheet: Ballooning_univariable
Analysis	Variable	Beta (SE)	p-value	AdjR^2	k
Ballooning_univariable	Qual_score	0.0 (0.1)	0.92	0	106
Ballooning_univariable	Protocol	0.1 (0.2)	0.63	0	106
Ballooning_univariable	Randomisation	-0.1 (0.1)	0.57	0	106
Ballooning_univariable	Blinding	0.0 (0.1)	0.97	0	106
Ballooning_univariable	Power_calculation	0.2 (0.3)	0.53	0	106
Ballooning_univariable	Chol_per	0.1 (0.1)	0.4	0	33
Ballooning_univariable	log_FructGluc_per	-1.7 (0.5)	0.0051	48.8	12
Ballooning_univariable	log_Sucr_kcal	-0.3 (0.3)	0.24	8.1	9
Ballooning_univariable	log_Fat_kcal	0.6 (0.2)	0.018	6.5	69
Ballooning_univariable	log_Age_start	0.1 (0.1)	0.36	0	98
Ballooning_univariable	log_Duration	-0.2 (0.1)	0.014	4.4	106
Ballooning_univariable	log_Age_end	-0.1 (0.1)	0.6	0	98
Ballooning_univariable	log_Wt_change	0.9 (0.4)	0.02	6	73
Ballooning_univariable	log_Gluc_change	0.8 (0.2)	0.0001	20.1	59
Ballooning_univariable	log_Insul_change	0.2 (0.1)	0.061	6.7	38
Ballooning_univariable	SexF	1.2 (0.4)	0.011	NA	101
Ballooning_univariable	SexM	1.1 (0.4)	0.013	NA	101
Ballooning_univariable	Sex_overall	NA ( NA)	0.037	4.5	101
Ballooning_univariable	Drug_dose	0.2 (0.1)	0.098	5.4	32
Ballooning_univariable	Indiv_drug_class_3ARB (Telmisartan)	0.0 (0.3)	0.91	NA	44
Ballooning_univariable	Indiv_drug_class_3DPP4 inhibitor (Sitagliptin)	-0.3 (0.3)	0.28	NA	44
Ballooning_univariable	Indiv_drug_class_3Eicosapentaenoic acid	0.1 (0.2)	0.62	NA	44
Ballooning_univariable	Indiv_drug_class_3Ezetimibe	0.3 (0.3)	0.29	NA	44
Ballooning_univariable	Indiv_drug_class_3FXR agonist (Obetacholic acid)	0.2 (0.2)	0.39	NA	44
Ballooning_univariable	Indiv_drug_class_3Metformin	-0.2 (0.3)	0.52	NA	44
Ballooning_univariable	Indiv_drug_class_3Probiotics	0.3 (0.3)	0.27	NA	44
Ballooning_univariable	Indiv_drug_class_3Silymarin	0.5 (0.3)	0.074	NA	44
Ballooning_univariable	Indiv_drug_class_3Tauroursodeoxycholic acid (TUDCA)	0.1 (0.3)	0.63	NA	44
Ballooning_univariable	Indiv_drug_class_3_overall	NA ( NA)	0.11	13	44
Ballooning_univariable	Model_simpleHFD + STZ	0.2 (0.4)	0.54	NA	61
Ballooning_univariable	Model_simpleHigh Fat + High Cholesterol Diet	0.4 (0.3)	0.23	NA	61
Ballooning_univariable	Model_simpleHigh Fat Diet / HFD	0.2 (0.3)	0.48	NA	61
Ballooning_univariable	Model_simpleMethionine and choline deficient diet / MCD	0.4 (0.4)	0.29	NA	61
Ballooning_univariable	Model_simpleMSG (L-monosodium glutamate) injection	0.6 (0.4)	0.11	NA	61
Ballooning_univariable	Model_simple_overall	NA ( NA)	0.3	2.6	61
Ballooning_univariable	Background_simpleC57BL/6?	0.0 (0.1)	0.89	NA	94
Ballooning_univariable	Background_simpleC57BL/6J	-0.1 (0.1)	0.51	NA	94
Ballooning_univariable	Background_simpleLong Evans	0.0 (0.3)	1	NA	94
Ballooning_univariable	Background_simpleNot stated	0.0 (0.2)	0.82	NA	94
Ballooning_univariable	Background_simpleSprague Dawley	-0.4 (0.2)	0.036	NA	94
Ballooning_univariable	Background_simple_overall	NA ( NA)	0.38	0.4	94
Ballooning_NoWtLoss	log_Wt_change	0.9 (0.4)	0.013	8	64
Ballooning_NoWtLoss	log_Gluc_change	0.8 (0.2)	0.0009	17.1	51
Ballooning_NoWtLoss	log_Insul_change	0.3 (0.2)	0.1	5	35
