# Supplementary material for: Weight loss, insulin resistance, and study design confound results in a meta-analysis of animal models of fatty liver
Source: eLife. 2020 Oct 16;9:e56573. doi: 10.7554/eLife.56573 (PMC7647398; doi:10.7554/eLife.56573)
Supplement: Figure 7—source data 1. — Tab 1. Results from meta-analysis of NAS with subgroup by drug class. Tab 2. Results from meta-analysis of NAS with subgroup by individual drug. Tab 3. Results from meta-analysis of NAS with subgroup by drug class, after removal of outlier studies. Tab 4. Results from univariable meta-regression analyses. Tab 5. Results from model 1 (without drug) and model 2 (including drug used) multivariable meta-regression analyses. [file elife-56573-fig7-data1.xlsx]

## Sheet: NAS_metan_class
	Drug class	k (cohorts)	Number of animals			Heterogeneity				Effect estimate
			Controls	Interventional	Total	I^2	Tau	Q	Pq	MD (95% CI)	Pz
	Angiotensin Receptor Blocker	8	84	70	154	0.8842	1.2	60.4493	1.2e-10	-1.5 (-2.5, -0.4)	0.013
	Biguanide	4	22	38	60	0.841713	0.7	18.9529	0.00028	-1.8 (-3.0, -0.6)	0.018
	Caspase inhibitor	7	50	82	132	0.926623	1	81.77	1.5e-15	-0.8 (-1.9, 0.2)	0.11
	Cholesterol Absorption Inhibitor	4	20	31	51	0.447612	0.6	5.43096	0.14	-1.1 (-2.3, 0.0)	0.051
	DPP4 inhibitor	11	59	109	168	0.935809	1.1	155.786	2.4e-28	-2.2 (-3.0, -1.4)	8e-05
	Eicosapentaenoic acid	6	36	42	78	0.989991	1.7	499.542	1e-105	-1.4 (-3.3, 0.4)	0.1
	Fibrates	6	45	49	94	0.895113	1.2	47.6702	4.1e-09	-3.7 (-5.1, -2.4)	0.00077
	FXR agonist	13	95	165	260	0.853086	0.9	81.6806	2e-12	-1.6 (-2.2, -1.0)	7.4e-05
	GLP-1 agonist	13	88	104	192	0.958476	1.3	288.992	9.6e-55	-2.2 (-3.0, -1.4)	8.7e-05
	Probiotic (mix)	6	58	75	133	0.594803	0.6	12.3397	0.03	-2.1 (-2.8, -1.3)	0.00093
	Silymarin	7	46	56	102	0.948352	1.2	116.172	1e-22	-1.8 (-3.0, -0.6)	0.0095
	Statin	5	30	56	86	0.865497	0.7	29.7392	5.5e-06	-0.7 (-1.6, 0.2)	0.11
	Thiazolidinediones	11	88	87	175	0.911481	0.8	112.971	1.3e-19	-1.7 (-2.4, -1.1)	0.00012
	Vitamin D	5	47	57	104	0.359614	0.4	6.24623	0.18	-1.9 (-2.6, -1.2)	0.0019
	Overall	106	768	1021	1789	0.95949	1.2	2591.95	0	-1.8 (-2.0, -1.6)	1.6e-27

## Sheet: NAS_metan_drug
	Drug	k (cohorts)	Number of animals			Heterogeneity				Effect estimate
			Controls	Interventional	Total	I^2	Tau	Q	Pq	MD (95% CI)	Pz
	ARB (Telmisartan)	5	63	44	107	0.873761	0.8	31.686	2.2e-06	-1.6 (-2.8, -0.4)	0.023
	DPP4 inhibitor (Linagliptin)	4	16	44	60	0.863936	0.9	22.0484	6.4e-05	-1.7 (-3.3, -0.1)	0.044
	DPP4 inhibitor (Sitagliptin)	6	37	59	96	0.960215	1.2	125.675	2e-25	-2.6 (-3.9, -1.2)	0.0046
	Eicosapentaenoic acid	6	36	42	78	0.989991	1.7	499.542	1e-105	-1.4 (-3.3, 0.4)	0.1
	Ezetimibe	4	20	31	51	0.447612	0.6	5.43096	0.14	-1.1 (-2.3, 0.0)	0.051
	Fibrate (Fenofibrate)	3	19	23	42	0.797178	1.1	9.86088	0.0072	-4.5 (-7.7, -1.2)	0.027
	FXR agonist (Obetacholic acid)	9	60	104	164	0.817914	0.9	43.9354	5.9e-07	-1.3 (-2.0, -0.5)	0.0039
	GLP-1 agonist (Exenatide)	4	26	26	52	0.753055	0.4	12.1485	0.0069	-1.8 (-2.6, -1.0)	0.0063
	Metformin	4	22	38	60	0.841713	0.7	18.9529	0.00028	-1.8 (-3.0, -0.6)	0.018
	Probiotics	3	44	45	89	0.812407	0.8	10.6614	0.0048	-1.9 (-4.1, 0.4)	0.071
	Silibinin	3	20	20	40	0.976579	1.6	85.395	2.9e-19	-2.4 (-6.4, 1.6)	0.12
	Silymarin	4	26	36	62	0.880481	0.8	25.1005	1.5e-05	-1.3 (-2.8, 0.1)	0.064
	Thiazolidinediones (Pioglitazone)	4	35	35	70	0.963537	1.1	82.2744	1e-17	-1.7 (-3.7, 0.3)	0.073
	Thiazolidinediones (Rosiglitazone)	6	43	42	85	0.770467	0.7	21.7833	0.00058	-1.9 (-2.8, -1.0)	0.0029
	Vitamin D	5	47	57	104	0.359614	0.4	6.24623	0.18	-1.9 (-2.6, -1.2)	0.0019
	Overall	70	514	646	1160	0.940557	1.1	1160.77	7.1e-198	-1.8 (-2.1, -1.5)	7.1e-20

## Sheet: NAS_metan_class_NoOutlier
	Drug class	k (cohorts)	Number of animals			Heterogeneity				Effect estimate
			Controls	Interventional	Total	I^2	Tau	Q	Pq	MD (95% CI)	Pz
	Angiotensin Receptor Blocker	7	74	60	134	0.897905	1.2	58.7686	8e-11	-1.4 (-2.6, -0.2)	0.027
	Biguanide	4	22	38	60	0.841713	0.7	18.9529	0.00028	-1.8 (-3.0, -0.6)	0.018
	Caspase inhibitor	6	45	70	115	0.84329	1.1	31.9061	6.2e-06	-1.0 (-2.2, 0.3)	0.097
	Cholesterol Absorption Inhibitor	4	20	31	51	0.447612	0.6	5.43096	0.14	-1.1 (-2.3, 0.0)	0.051
	DPP4 inhibitor	11	59	109	168	0.935809	1.1	155.786	2.4e-28	-2.2 (-3.0, -1.4)	8e-05
	Eicosapentaenoic acid	5	28	34	62	0.893997	1.3	37.7348	1.3e-07	-0.9 (-2.5, 0.8)	0.22
	Fibrates	6	45	49	94	0.895113	1.2	47.6702	4.1e-09	-3.7 (-5.1, -2.4)	0.00077
	FXR agonist	13	95	165	260	0.853086	0.9	81.6806	2e-12	-1.6 (-2.2, -1.0)	7.4e-05
	GLP-1 agonist	13	88	104	192	0.958476	1.3	288.992	9.6e-55	-2.2 (-3.0, -1.4)	8.7e-05
	Probiotic (mix)	6	58	75	133	0.594803	0.6	12.3397	0.03	-2.1 (-2.8, -1.3)	0.00093
	Silymarin	7	46	56	102	0.948352	1.2	116.172	1e-22	-1.8 (-3.0, -0.6)	0.0095
	Statin	5	30	56	86	0.865497	0.7	29.7392	5.5e-06	-0.7 (-1.6, 0.2)	0.11
	Thiazolidinediones	11	88	87	175	0.911481	0.8	112.971	1.3e-19	-1.7 (-2.4, -1.1)	0.00012
	Vitamin D	4	37	47	84	0.427703	0.4	5.24203	0.15	-2.0 (-2.9, -1.1)	0.0056
	Overall	102	735	981	1716	0.933313	1.2	1514.55	1.1e-250	-1.8 (-2.0, -1.6)	6.3e-27

## Sheet: NAS_univariable
Analysis	Variable	Beta (SE)	p-value	AdjR^2	k
NAS_univariable	Qual_score	0.3 (0.1)	0.031	2.5	144
NAS_univariable	Protocol	0.6 (0.3)	0.078	1.5	144
NAS_univariable	Randomisation	0.2 (0.2)	0.34	0	144
NAS_univariable	Blinding	0.2 (0.2)	0.38	0	144
NAS_univariable	Power_calculation	1.4 (0.7)	0.039	2.2	144
NAS_univariable	Chol_per	0.1 (0.2)	0.69	0	45
NAS_univariable	log_FructGluc_per	-2.0 (1.2)	0.11	9.1	19
NAS_univariable	log_Sucr_kcal	0.7 (0.5)	0.21	6	13
NAS_univariable	log_Fat_kcal	1.0 (0.5)	0.064	2.9	89
NAS_univariable	log_Age_start	0.2 (0.2)	0.25	0.2	137
NAS_univariable	log_Duration	-0.1 (0.2)	0.71	0	144
NAS_univariable	log_Age_end	0.0 (0.2)	0.98	0	137
NAS_univariable	log_Wt_change	2.9 (1.0)	0.0051	6.8	102
NAS_univariable	log_Gluc_change	1.7 (0.5)	0.0016	12.2	72
NAS_univariable	log_Insul_change	0.0 (0.4)	0.96	0	43
NAS_univariable	SexF	2.1 (0.8)	0.0073	NA	140
NAS_univariable	SexM	1.1 (0.7)	0.14	NA	140
NAS_univariable	Sex_overall	NA ( NA)	0.003	6.8	140
NAS_univariable	Drug_dose	0.0 (0.2)	0.88	0	56
NAS_univariable	Indiv_drug_class_3ARB (Telmisartan)	0.1 (0.7)	0.85	NA	70
NAS_univariable	Indiv_drug_class_3DPP4 inhibitor (Linagliptin)	0.1 (0.8)	0.89	NA	70
NAS_univariable	Indiv_drug_class_3DPP4 inhibitor (Sitagliptin)	-0.8 (0.7)	0.25	NA	70
NAS_univariable	Indiv_drug_class_3Eicosapentaenoic acid	0.4 (0.7)	0.57	NA	70
NAS_univariable	Indiv_drug_class_3Ezetimibe	0.7 (0.8)	0.37	NA	70
NAS_univariable	Indiv_drug_class_3Fibrate (Fenofibrate)	-2.7 (0.8)	0.0027	NA	70
NAS_univariable	Indiv_drug_class_3FXR agonist (Obetacholic acid)	0.5 (0.6)	0.42	NA	70
NAS_univariable	Indiv_drug_class_3GLP-1 agonist (Exenatide)	0.0 (0.8)	0.98	NA	70
NAS_univariable	Indiv_drug_class_3Metformin	-0.1 (0.8)	0.91	NA	70
NAS_univariable	Indiv_drug_class_3Probiotics	-0.1 (0.8)	0.93	NA	70
NAS_univariable	Indiv_drug_class_3Silibinin	-0.6 (0.8)	0.45	NA	70
NAS_univariable	Indiv_drug_class_3Silymarin	0.4 (0.8)	0.57	NA	70
NAS_univariable	Indiv_drug_class_3Thiazolidinediones (Pioglitazone)	0.1 (0.8)	0.91	NA	70
NAS_univariable	Indiv_drug_class_3Thiazolidinediones (Rosiglitazone)	-0.1 (0.7)	0.86	NA	70
NAS_univariable	Indiv_drug_class_3_overall	NA ( NA)	0.056	15.1	70
NAS_univariable	Model_simpleHFD + STZ	0.1 (0.9)	0.94	NA	97
NAS_univariable	Model_simpleHigh Fat + High Cholesterol Diet	0.4 (0.9)	0.63	NA	97
NAS_univariable	Model_simpleHigh Fat + High Sucrose	-0.8 (1.0)	0.44	NA	97
NAS_univariable	Model_simpleHigh Fat Diet / HFD	-0.6 (0.9)	0.5	NA	97
NAS_univariable	Model_simpleHigh fat, fructose, cholesterol	-0.4 (1.0)	0.65	NA	97
NAS_univariable	Model_simpleLeptin Receptor Deficiency (db/db)	-0.1 (1.0)	0.91	NA	97
NAS_univariable	Model_simpleLeptin Receptor Deficiency (db/db) + MCD	0.5 (1.0)	0.61	NA	97
NAS_univariable	Model_simpleMethionine and choline deficient diet / MCD	-1.0 (0.9)	0.28	NA	97
NAS_univariable	Model_simpleMSG (L-monosodium glutamate) injection	-0.2 (1.0)	0.8	NA	97
NAS_univariable	Model_simple_overall	NA ( NA)	0.11	5.5	97
NAS_univariable	Background_simpleC57BL/6?	-0.4 (0.3)	0.19	NA	122
NAS_univariable	Background_simpleC57BL/6J	0.0 (0.3)	0.87	NA	122
NAS_univariable	Background_simpleLong Evans	0.6 (0.6)	0.35	NA	122
NAS_univariable	Background_simpleMixed	-0.2 (0.5)	0.74	NA	122
NAS_univariable	Background_simpleNot stated	0.7 (0.5)	0.13	NA	122
NAS_univariable	Background_simpleSprague Dawley	-1.5 (0.4)	0.00016	NA	122
NAS_univariable	Background_simple_overall	NA ( NA)	0.00046	14.6	122
NAS_NoWtLoss	log_Wt_change	3.5 (1.1)	0.0012	11.2	84
NAS_NoWtLoss	log_Gluc_change	1.6 (0.5)	0.0032	12.2	62
NAS_NoWtLoss	log_Insul_change	0.4 (0.4)	0.33	0	39

## Sheet: NAS_multivariable
Analysis	Variable	Model 1: Beta (SE)	Model 1: p-value	Model 2: Beta (SE)	Model 2: p-value
NAS_multivariable	Background_simpleC57BL/6?	1.7 (0.7)	0.039	2.2 (1.1)	0.043
NAS_multivariable	Background_simpleC57BL/6J	1.2 (0.6)	0.055	1.7 (1.0)	0.11
NAS_multivariable	intrcpt	-13.8 (7.5)	0.091	6.0 (5.9)	0.32
NAS_multivariable	log_Fat_kcal	2.8 (1.9)	0.17	-2.3 (1.4)	0.11
NAS_multivariable	log_Age_start	-0.5 (0.4)	0.32	NA	NA
NAS_multivariable	log_Wt_change	1.3 (2.0)	0.52	5.7 (2.3)	0.024
NAS_multivariable	log_Gluc_change	0.3 (0.9)	0.78	NA	NA
NAS_multivariable	Background_simpleMixed	NA	NA	-2.4 (2.4)	0.33
NAS_multivariable	Background_simpleSprague Dawley	NA	NA	-0.1 (1.1)	0.91
