# Supplementary material for: Weight loss, insulin resistance, and study design confound results in a meta-analysis of animal models of fatty liver
Source: eLife. 2020 Oct 16;9:e56573. doi: 10.7554/eLife.56573 (PMC7647398; doi:10.7554/eLife.56573)
Supplement: Figure 8—source data 1. — Tab 1. Results from meta-analysis of fibrosis stage with subgroup by drug class. Tab 2. Results from meta-analysis of fibrosis stage with subgroup by individual drug. Tab 3. Results from meta-analysis of fibrosis stage with subgroup by drug class, after removal of outlier studies. Tab 4. Results from univariable meta-regression analyses. Tab 5. Results from multivariable meta-regression analyses. [file elife-56573-fig8-data1.xlsx]

## Sheet: Fib_metan_class
	Drug class	k (cohorts)	Number of animals			Heterogeneity				Effect estimate
			Controls	Interventional	Total	I^2	Tau	Q	Pq	MD (95% CI)	Pz
	Angiotensin Receptor Blocker	6	42	37	79	0.926796	0.7	68.302	2.3e-13	-0.7 (-1.5, 0.1)	0.08
	Biguanide	6	57	83	140	0.424988	0.1	8.69547	0.12	-0.1 (-0.3, 0.1)	0.13
	FXR agonist	9	91	168	259	0.707519	0.2	27.3522	0.00061	-0.5 (-0.7, -0.2)	0.0019
	GLP-1 agonist	5	24	40	64	0.82018	0.4	22.2445	0.00018	-0.5 (-1.0, 0.0)	0.062
	Statin	8	29	82	111	0	0.3	4.27146	0.75	-0.5 (-0.8, -0.2)	0.0062
	Overall	34	243	410	653	0.824182	0.4	187.694	1.5e-23	-0.5 (-0.6, -0.3)	7.5e-07

## Sheet: Fib_metan_drug
	Drug	k (cohorts)	Number of animals			Heterogeneity				Effect estimate
			Controls	Interventional	Total	I^2	Tau	Q	Pq	MD (95% CI)	Pz
	FXR agonist (Obetacholic acid)	7	71	127	198	0.694769	0.2	19.6573	0.0032	-0.4 (-0.7, -0.1)	0.016
	Metformin	6	57	83	140	0.424988	0.1	8.69547	0.12	-0.1 (-0.3, 0.1)	0.13
	Overall	13	128	210	338	0.701034	0.2	40.1384	6.8e-05	-0.3 (-0.5, -0.1)	0.0033

## Sheet: Fib_metan_class_NoOutlier
	Drug class	k (cohorts)	Number of animals			Heterogeneity				Effect estimate
			Controls	Interventional	Total	I^2	Tau	Q	Pq	MD (95% CI)	Pz
	Angiotensin Receptor Blocker	4	33	27	60	0.58485	0.4	7.2263	0.065	-0.7 (-1.5, 0.2)	0.086
	Biguanide	4	31	46	77	0.102592	0.1	3.34296	0.34	-0.2 (-0.5, 0.1)	0.11
	FXR agonist	9	91	168	259	0.707519	0.2	27.3522	0.00061	-0.5 (-0.7, -0.2)	0.0019
	GLP-1 agonist	4	18	34	52	0.654714	0.2	8.68844	0.034	-0.3 (-0.8, 0.1)	0.099
	Statin	7	21	66	87	0	0.3	4.10962	0.66	-0.5 (-0.8, -0.1)	0.014
	Overall	28	194	341	535	0.546319	0.3	59.5132	0.00031	-0.4 (-0.6, -0.3)	1.9e-07

## Sheet: Fibrosis_univariable
Analysis	Variable	Beta (SE)	p-value	AdjR^2	k
Fibrosis_univariable	Qual_score	0.0 (0.1)	0.94	0	58
Fibrosis_univariable	Protocol	0.1 (0.2)	0.35	0	58
Fibrosis_univariable	Randomisation	-0.1 (0.1)	0.5	0	58
Fibrosis_univariable	Blinding	0.0 (0.1)	0.82	0	58
Fibrosis_univariable	Power_calculation	0.1 (0.3)	0.61	0	58
Fibrosis_univariable	Chol_per	0.1 (0.1)	0.72	0	22
Fibrosis_univariable	log_FructGluc_per	-0.4 (1.0)	0.69	0	16
Fibrosis_univariable	log_Sucr_kcal	-2.9 (0.9)	0.048	61.5	5
Fibrosis_univariable	log_Fat_kcal	0.4 (0.4)	0.32	0	38
Fibrosis_univariable	log_Age_start	-0.1 (0.1)	0.28	0.6	57
Fibrosis_univariable	log_Duration	-0.1 (0.1)	0.47	0	58
Fibrosis_univariable	log_Age_end	-0.2 (0.2)	0.15	2.4	57
Fibrosis_univariable	log_Wt_change	1.5 (0.5)	0.002	18	43
Fibrosis_univariable	log_Gluc_change	-0.5 (0.3)	0.12	5.8	25
Fibrosis_univariable	log_Insul_change	0.1 (0.3)	0.77	0	11
Fibrosis_univariable	SexF	0.0 (0.5)	0.93	NA	57
Fibrosis_univariable	SexM	-0.4 (0.4)	0.35	NA	57
Fibrosis_univariable	Sex_overall	NA ( NA)	0.35	0	57
Fibrosis_univariable	Drug_dose	-0.1 (0.1)	0.22	6.6	13
Fibrosis_univariable	Indiv_drug_class_3FXR agonist (Obetacholic acid)	-0.2 (0.2)	0.17	NA	13
Fibrosis_univariable	Indiv_drug_class_3_overall	NA ( NA)	0.17	8.1	13
Fibrosis_univariable	Model_simpleCholine deficient diet	-0.1 (0.4)	0.88	NA	17
Fibrosis_univariable	Model_simpleHigh Fat Diet / HFD	-0.5 (0.4)	0.21	NA	17
Fibrosis_univariable	Model_simple_overall	NA ( NA)	0.44	0	17
Fibrosis_univariable	Background_simpleC57BL/6?	-0.2 (0.2)	0.29	NA	34
Fibrosis_univariable	Background_simpleC57BL/6J	-0.4 (0.1)	0.0067	NA	34
Fibrosis_univariable	Background_simple_overall	NA ( NA)	0.023	14.6	34
Fibrosis_NoWtLoss	log_Wt_change	1.4 (0.4)	0.0043	26.8	24
Fibrosis_NoWtLoss	log_Gluc_change	-0.5 (0.4)	0.2	4.3	18
Fibrosis_NoWtLoss	log_Insul_change	-0.3 (0.4)	0.53	0	9

## Sheet: Fibrosis_multivariable
Analysis	Variable	Model 1: Beta (SE)	Model 1: p-value
Fibrosis_multivariable	log_Fat_kcal	-0.9 ( 3.7)	0.86
Fibrosis_multivariable	Qual_score	-0.6 ( 0.4)	0.38
Fibrosis_multivariable	log_Wt_change	2.7 ( 5.6)	0.71
Fibrosis_multivariable	log_Gluc_change	2.6 ( 4.0)	0.63
Fibrosis_multivariable	log_Duration	-0.2 ( 0.5)	0.78
Fibrosis_multivariable	Model_simpleApoE knockout (ApoE -/-) + HFD + STZ	1.6 ( 1.3)	0.44
Fibrosis_multivariable	Model_simpleCDAA + HFD (CDAHFD)	-0.9 ( 1.4)	0.64
Fibrosis_multivariable	Model_simpleHFD + CCl4	1.0 ( 2.6)	0.77
Fibrosis_multivariable	Model_simpleHFD + STZ	0.8 ( 1.3)	0.67
Fibrosis_multivariable	Model_simpleHigh Fat Diet / HFD	0.2 ( 1.6)	0.91
Fibrosis_multivariable	Model_simpleLeptin Deficiency (ob/ob) + FFC	-1.0 ( 0.9)	0.45
Fibrosis_multivariable	Model_simpleMC4R KO + Western diet	1.3 ( 3.8)	0.79
Fibrosis_multivariable	Model_simpleMC4R-KO + Western diet	-1.0 ( 0.8)	0.44
Fibrosis_multivariable	log_Age_start	-0.8 ( 1.2)	0.63
