# Supplementary figures and images for: Weight loss, insulin resistance, and study design confound results in a meta-analysis of animal models of fatty liver
Source: eLife journal article supplement (doi:10.7554/elife.56573), 2020-10-16

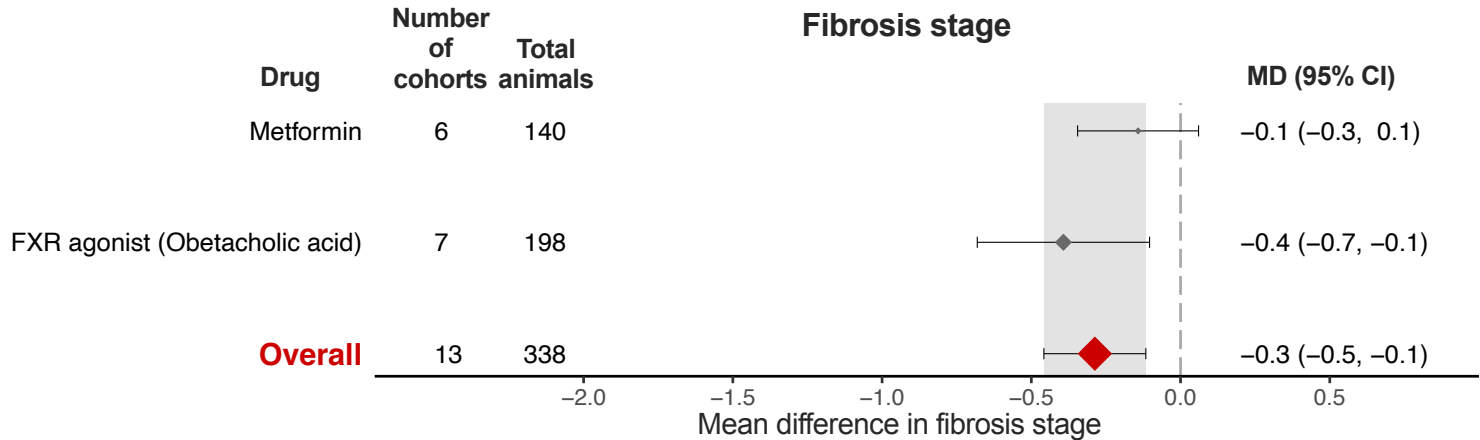

Supplement: supp [file elife-56573-supp-v1.zip]

## Hepatocellular ballooning

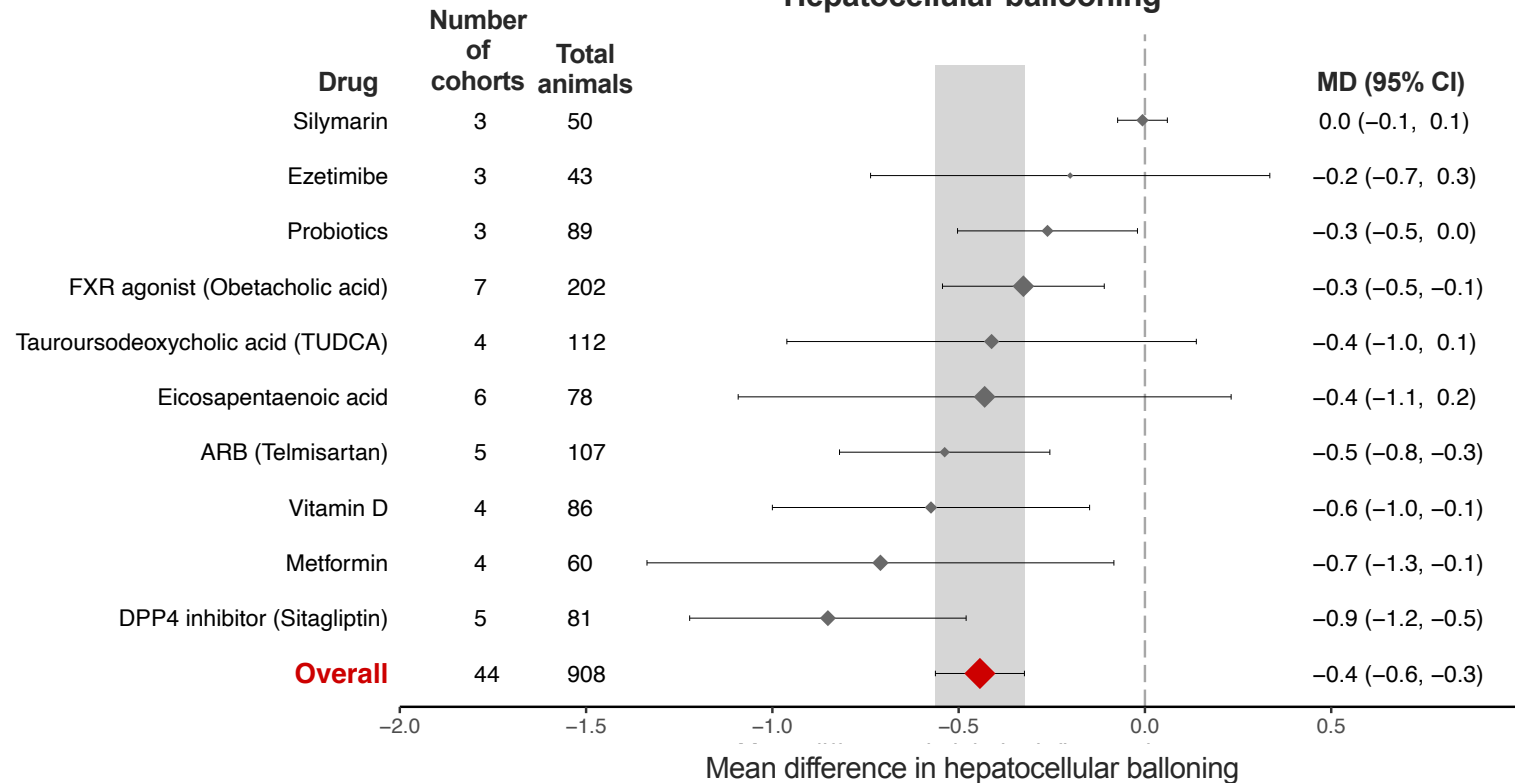

Supplement: supp [file elife-56573-supp-v1.zip]

# Hepatic triglyceride

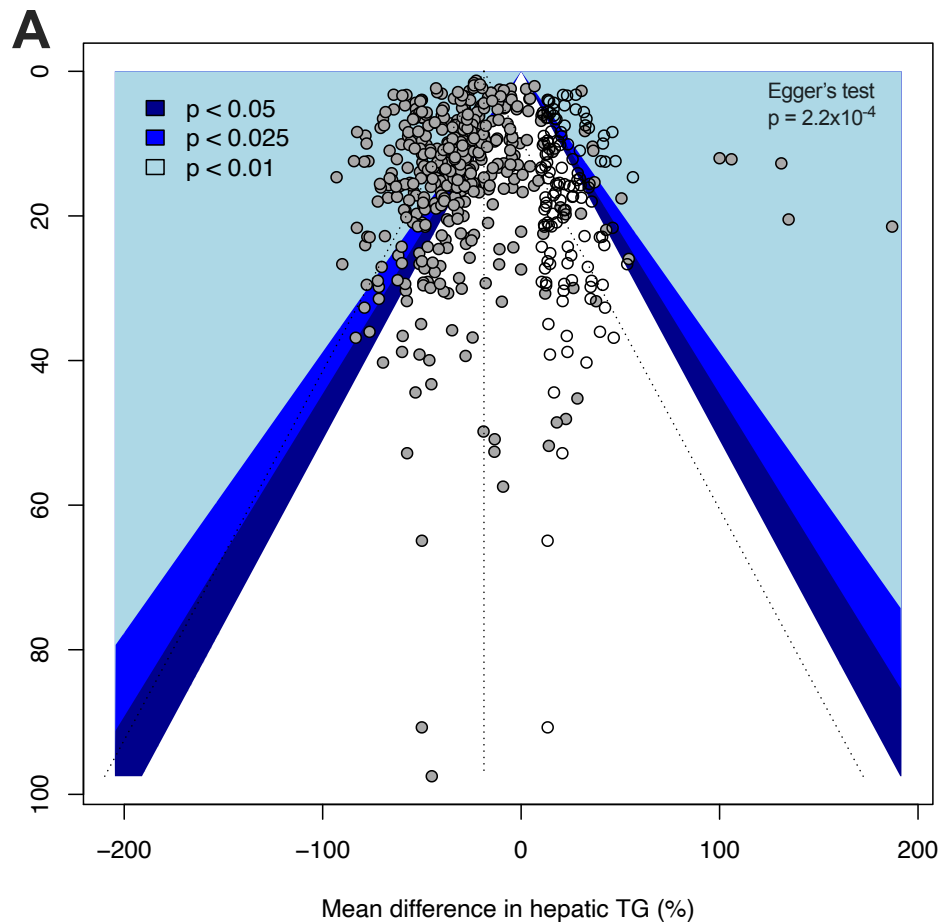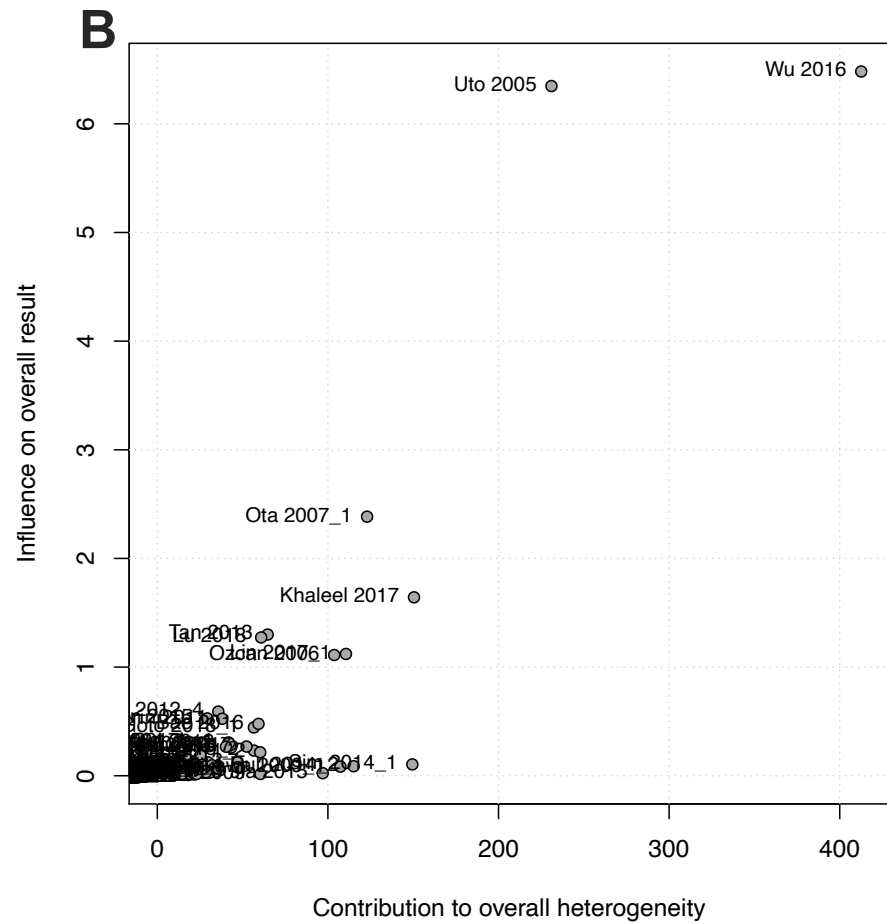

Supplement: supp [file elife-56573-supp-v1.zip]

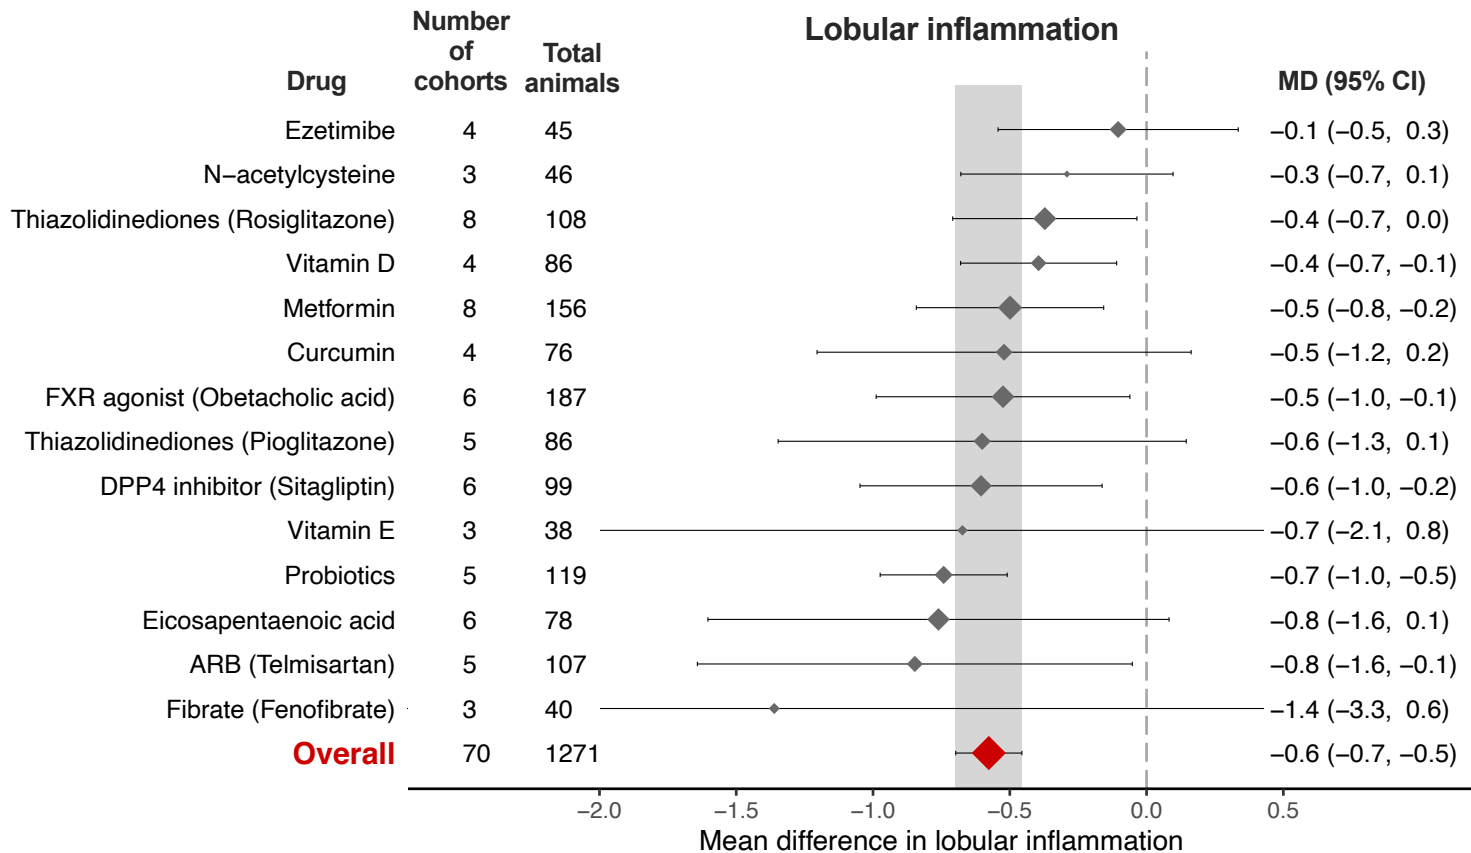

Supplement: supp [file elife-56573-supp-v1.zip]

## A Overall quality score

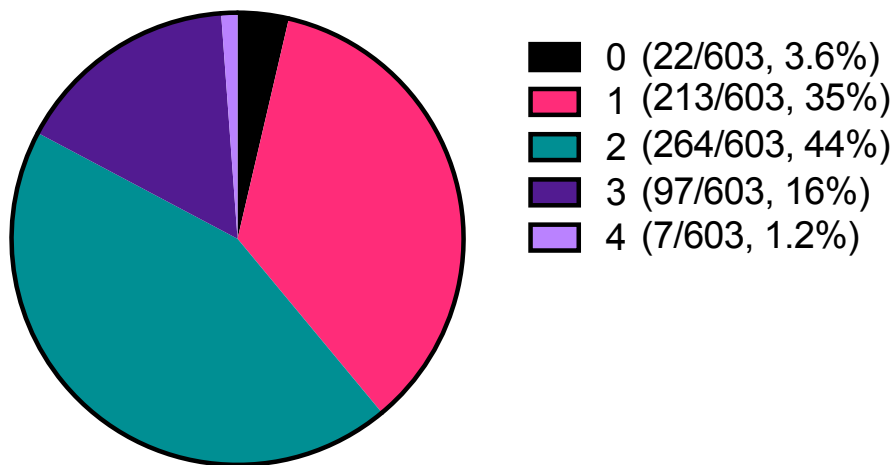

## B

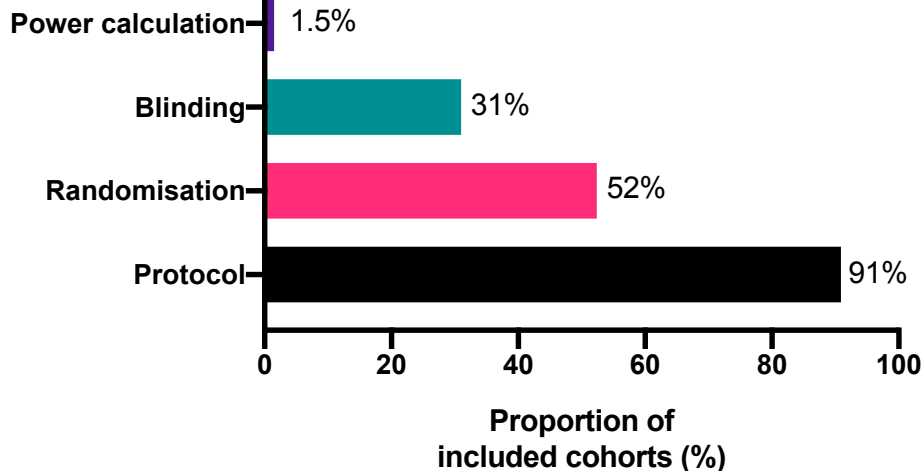

Supplement: supp [file elife-56573-supp-v1.zip]

# Steatosis grade

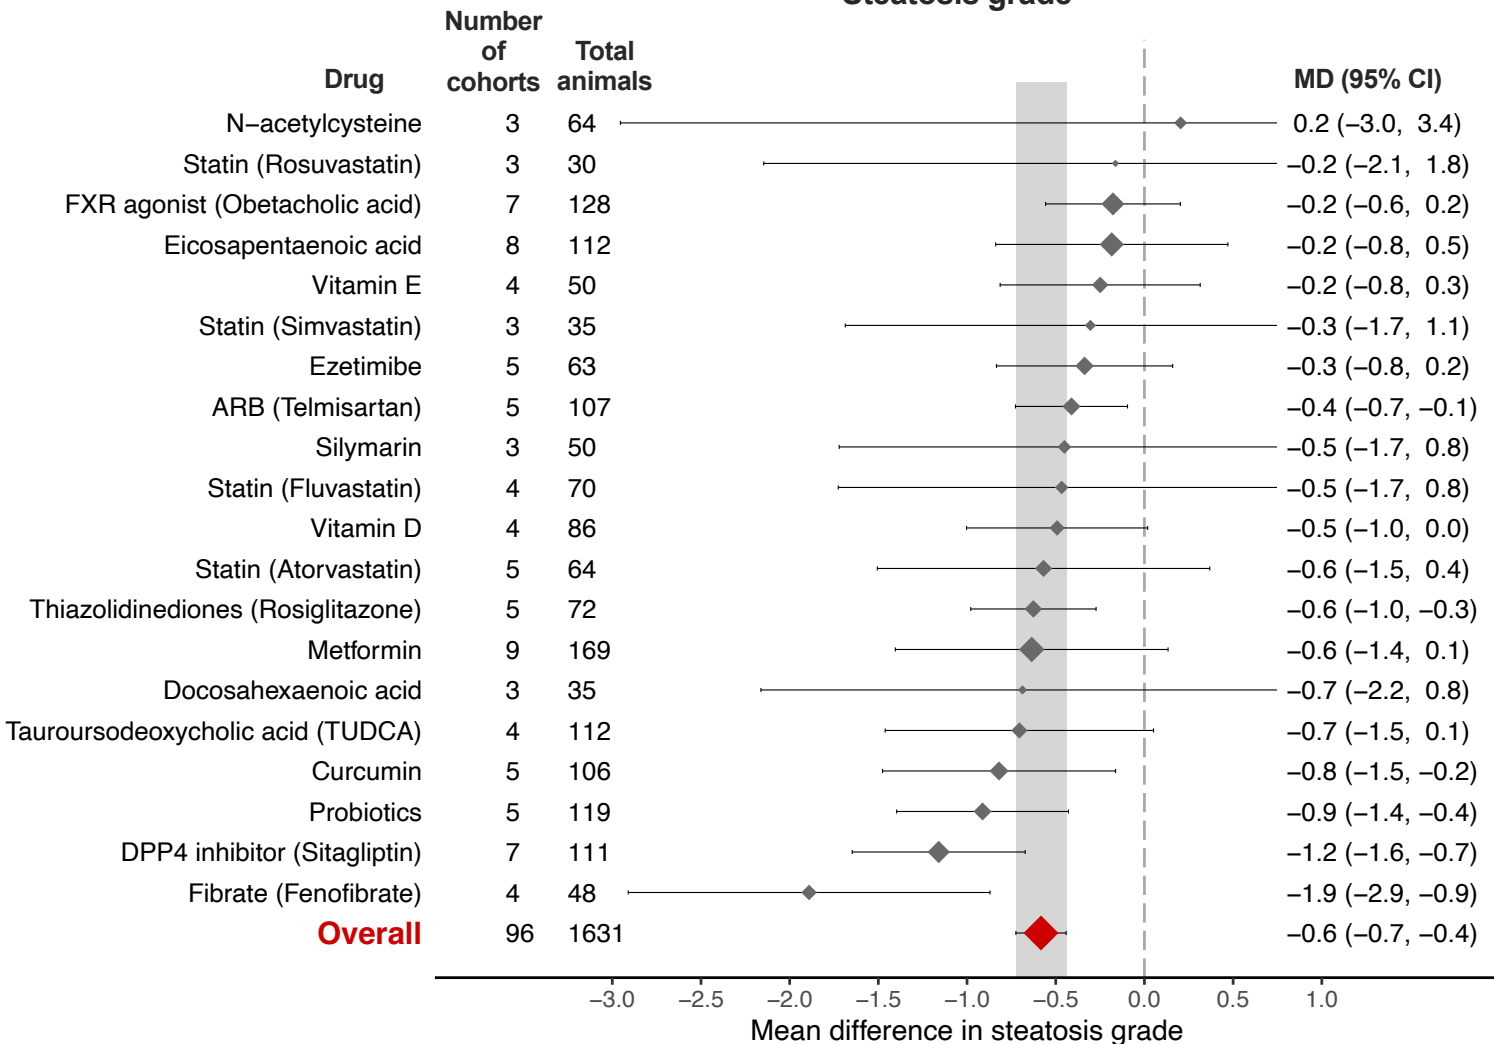

Supplement: supp [file elife-56573-supp-v1.zip]

# NAFLD Activity Score

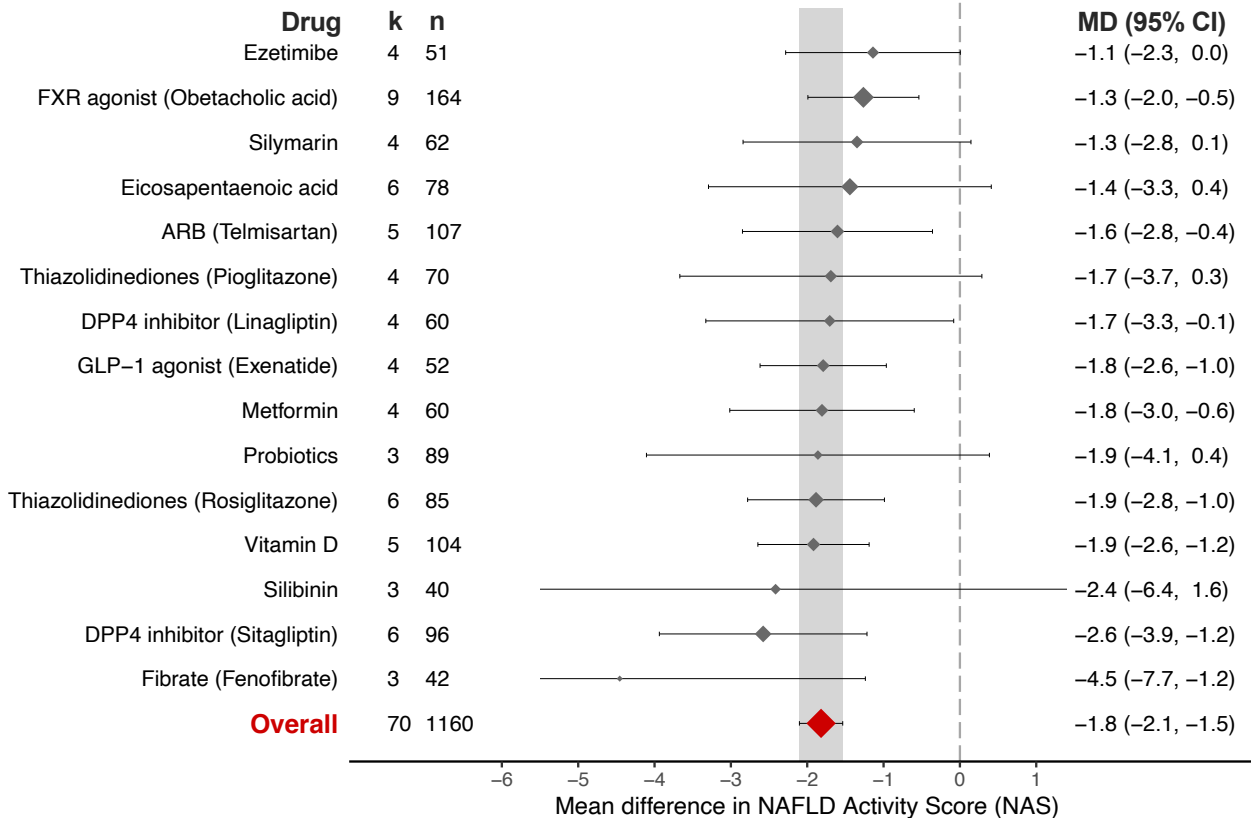

Supplement: supp [file elife-56573-supp-v1.zip]

## Insulin

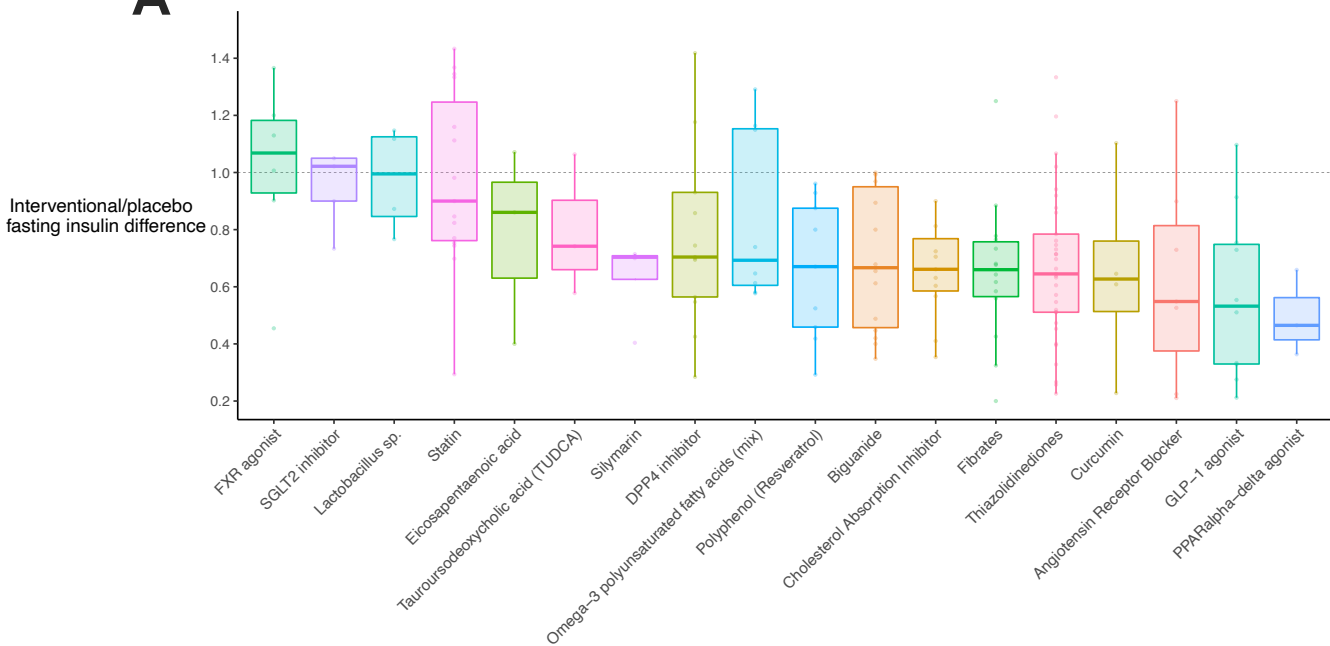

# B

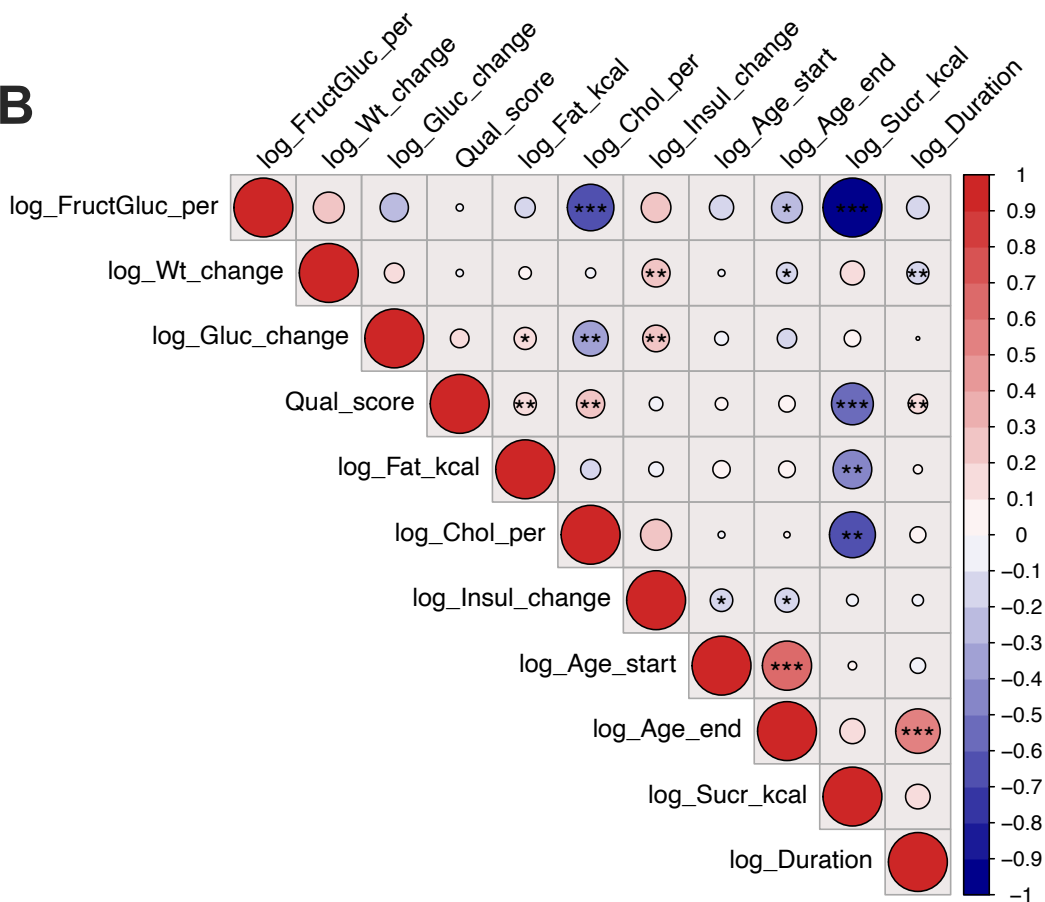

Supplement: supp [file elife-56573-supp-v1.zip]

# Hepatic triglyceride

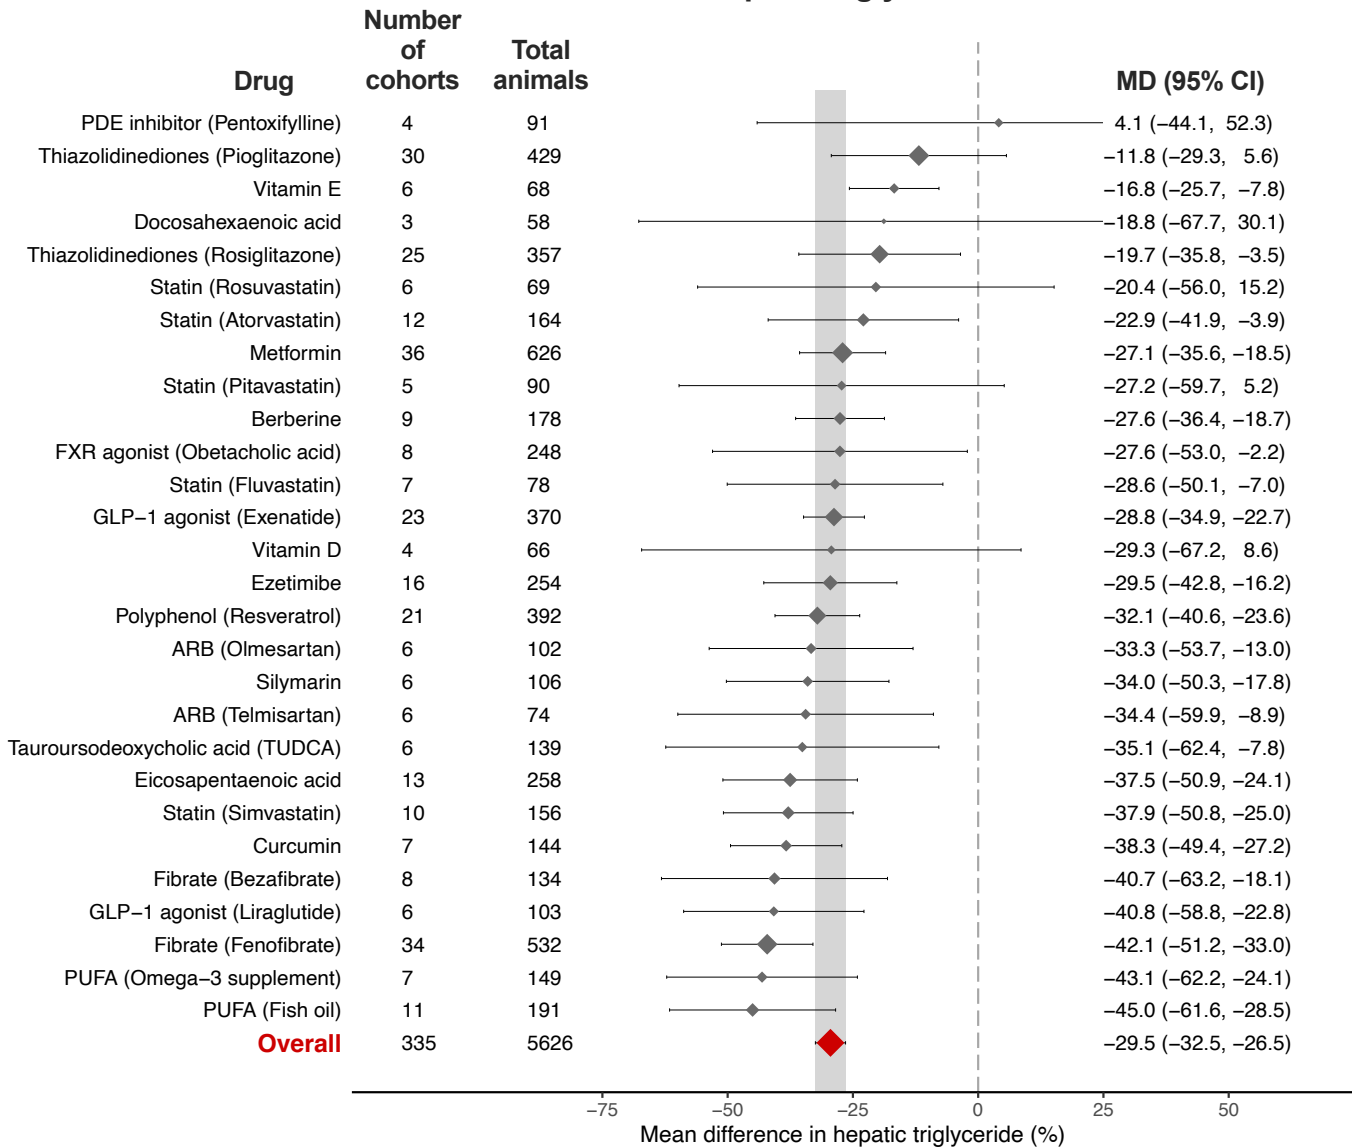

Supplement: supp [file elife-56573-supp-v1.zip]
